# Supplementary material for: Neuronal Modulators from the Coral-Associated Fungi Aspergillus candidus
Source: MDPI journal article supplement (doi:10.3390/md19050281), 2021-05-19
Supplement: s1 [file s1]

# Neuronal Modulators from the Coral-Associated Fungi *Aspergillus candidus*

Gao-Yang Peng <sup>1,2,3</sup>, Tibor Kurtán <sup>4</sup>, Attila Mándi <sup>4</sup>, Jing He <sup>5</sup>, Zheng-Yu Cao <sup>5</sup>, Hua Tang <sup>6</sup>, Shui-Chun Mao <sup>1,\*</sup> and Wen Zhang <sup>2,3,\*</sup>

<sup>1</sup>School of Pharmacy, Nanchang University, 461 Bayi Road, Nanchang 330006, P. R. China

<sup>2</sup>Tongji University School of Medicine, 1239 Si-Ping Rd., Shanghai 200092, P. R. China

<sup>3</sup>School of Pharmacy, Second Military Medical University, 325 Guo-He Rd., Shanghai 200433, P. R. China

<sup>4</sup>Department of Organic Chemistry, University of Debrecen, POB 400, H-4002 Debrecen, Hungary

<sup>5</sup>State Key Laboratory of Natural Medicines and Department of TCM Pharmacology, School of Traditional Chinese Pharmacy, China Pharmaceutical University, 639 Long-Mian Ave., Nanjing 211198, P. R. China

<sup>6</sup>Institute of Translational Medicine, Shanghai University, 99 Shang-Da Rd., Shanghai 200444, P. R. China

\*Correspondence: [wenzhang1968@163.com](mailto:wenzhang1968@163.com) (W.Z.); [maoshuichun@ncu.edu.cn](mailto:maoshuichun@ncu.edu.cn) (S.-C.M.)

## Table of contents

|                                                                                            |     |
|--------------------------------------------------------------------------------------------|-----|
| Table S1. $^1\text{H}$ and $^{13}\text{C}$ NMR Data for <b>20</b>                          | S1  |
| Table S2. Computed and experimental $^{13}\text{C}$ NMR data comparison of <b>24</b>       | S3  |
| Figure S1. Selected COSY, HMBC, and NOESY correlations of <b>1-3</b>                       | S4  |
| Figure S2. MS of <b>1</b>                                                                  | S5  |
| Figure S3. IR (film) of <b>1</b>                                                           | S5  |
| Figure S4. UV of <b>1</b> in MeCN                                                          | S6  |
| Figure S5. $^1\text{H}$ -NMR spectrum of <b>1</b> in $\text{CDCl}_3$ at 500 MHz            | S7  |
| Figure S6. $^{13}\text{C}$ -NMR spectrum of <b>1</b> in $\text{CDCl}_3$ at 125 MHz         | S8  |
| Figure S7. DEPT spectrum of <b>1</b> in $\text{CDCl}_3$ at 125 MHz                         | S9  |
| Figure S8. HSQC spectrum of <b>1</b> in $\text{CDCl}_3$                                    | S10 |
| Figure S9. COSY spectrum of <b>1</b> in $\text{CDCl}_3$                                    | S10 |
| Figure S10. HMBC spectrum of <b>1</b> in $\text{CDCl}_3$                                   | S11 |
| Figure S11. NOESY spectrum of <b>1</b> in $\text{CDCl}_3$                                  | S11 |
| Figure S12. MS of <b>2</b>                                                                 | S12 |
| Figure S13. IR (film) of <b>2</b>                                                          | S12 |
| Figure S14. UV of <b>2</b> in MeCN                                                         | S13 |
| Figure S15. $^1\text{H}$ -NMR spectrum of <b>2</b> in $\text{CD}_3\text{OD}$ at 500 MHz    | S14 |
| Figure S16. $^{13}\text{C}$ -NMR spectrum of <b>2</b> in $\text{CD}_3\text{OD}$ at 125 MHz | S15 |
| Figure S17. DEPT spectrum of <b>2</b> in $\text{CD}_3\text{OD}$ at 125 MHz                 | S16 |
| Figure S18. HSQC spectrum of <b>2</b> in $\text{CD}_3\text{OD}$                            | S17 |
| Figure S19. COSY spectrum of <b>2</b> in $\text{CD}_3\text{OD}$                            | S17 |
| Figure S20. HMBC spectrum of <b>2</b> in $\text{CD}_3\text{OD}$                            | S18 |
| Figure S21. NOESY spectrum of <b>2</b> in $\text{CD}_3\text{OD}$                           | S18 |
| Figure S22. MS of <b>3</b>                                                                 | S19 |
| Figure S23. IR (film) of <b>3</b>                                                          | S19 |
| Figure S24. UV of <b>3</b> in MeCN                                                         | S20 |
| Figure S25. $^1\text{H}$ -NMR spectrum of <b>3</b> in $\text{CDCl}_3$ at 500 MHz           | S21 |
| Figure S26. $^{13}\text{C}$ -NMR spectrum of <b>3</b> in $\text{CDCl}_3$ at 125 MHz        | S22 |

|                                                                                      |     |
|--------------------------------------------------------------------------------------|-----|
| Figure S27. DEPT spectrum of <b>3</b> in CDCl <sub>3</sub> at 125 MHz                | S23 |
| Figure S28. HSQC spectrum of <b>3</b> in CDCl <sub>3</sub>                           | S24 |
| Figure S29. COSY spectrum of <b>3</b> in CDCl <sub>3</sub>                           | S24 |
| Figure S30. HMBC spectrum of <b>3</b> in CDCl <sub>3</sub>                           | S25 |
| Figure S31. NOESY spectrum of <b>3</b> in CDCl <sub>3</sub>                          | S25 |
| Figure S32. MS of <b>17</b>                                                          | S26 |
| Figure S33. IR (film) of <b>17</b>                                                   | S26 |
| Figure S34. UV of <b>17</b> in MeCN                                                  | S27 |
| Figure S35. <sup>1</sup> H-NMR spectrum of <b>17</b> in DMSO at 600 MHz              | S28 |
| Figure S36. <sup>13</sup> C-NMR spectrum of <b>17</b> in DMSO at 125 MHz             | S29 |
| Figure S37. DEPT spectrum of <b>17</b> in DMSO at 125 MHz                            | S30 |
| Figure S38. HSQC spectrum of <b>17</b> in DMSO                                       | S31 |
| Figure S39. COSY spectrum of <b>17</b> in DMSO                                       | S31 |
| Figure S40. HMBC spectrum of <b>17</b> in DMSO                                       | S32 |
| Figure S41. NOESY spectrum of <b>17</b> in DMSO                                      | S32 |
| Figure S42. MS of <b>18</b>                                                          | S33 |
| Figure S43. IR (film) of <b>18</b>                                                   | S33 |
| Figure S44. UV of <b>18</b> in MeCN                                                  | S34 |
| Figure S45. <sup>1</sup> H-NMR spectrum of <b>18</b> in DMSO at 500 MHz              | S35 |
| Figure S46. <sup>13</sup> C-NMR spectrum of <b>18</b> in DMSO at 125 MHz             | S36 |
| Figure S47. DEPT spectrum of <b>18</b> in DMSO at 125 MHz                            | S37 |
| Figure S48. HSQC spectrum of <b>18</b> in DMSO                                       | S38 |
| Figure S49. COSY spectrum of <b>18</b> in DMSO                                       | S38 |
| Figure S50. HMBC spectrum of <b>18</b> in DMSO                                       | S39 |
| Figure S51. NOESY spectrum of <b>18</b> in DMSO                                      | S39 |
| Figure S52. MS of <b>22</b>                                                          | S40 |
| Figure S53. IR (film) of <b>22</b>                                                   | S40 |
| Figure S54. UV of <b>22</b> in MeCN                                                  | S41 |
| Figure S55. <sup>1</sup> H-NMR spectrum of <b>22</b> in CDCl <sub>3</sub> at 500 MHz | S42 |

|                                                                                                                                                                             |     |
|-----------------------------------------------------------------------------------------------------------------------------------------------------------------------------|-----|
| Figure S56. $^{13}\text{C}$ -NMR spectrum of <b>22</b> in $\text{CDCl}_3$ at 125 MHz                                                                                        | S43 |
| Figure S57. DEPT spectrum of <b>22</b> in $\text{CDCl}_3$ at 125 MHz                                                                                                        | S44 |
| Figure S58. HSQC spectrum of <b>22</b> in $\text{CDCl}_3$                                                                                                                   | S45 |
| Figure S59. COSY spectrum of <b>22</b> in $\text{CDCl}_3$                                                                                                                   | S45 |
| Figure S60. HMBC spectrum of <b>22</b> in $\text{CDCl}_3$                                                                                                                   | S46 |
| Figure S61. NOESY spectrum of <b>22</b> in $\text{CDCl}_3$                                                                                                                  | S46 |
| Figure S62. MS of <b>23</b>                                                                                                                                                 | S47 |
| Figure S63. IR (film) of <b>23</b>                                                                                                                                          | S47 |
| Figure S64. UV of <b>23</b> in MeCN                                                                                                                                         | S48 |
| Figure S65. $^1\text{H}$ -NMR spectrum of <b>23</b> in $\text{CDCl}_3$ at 600 MHz                                                                                           | S49 |
| Figure S66. $^{13}\text{C}$ -NMR spectrum of <b>23</b> in $\text{CDCl}_3$ at 125 MHz                                                                                        | S50 |
| Figure S67. DEPT spectrum of <b>23</b> in $\text{CDCl}_3$ at 125 MHz                                                                                                        | S51 |
| Figure S68. HSQC spectrum of <b>23</b> in $\text{CDCl}_3$                                                                                                                   | S52 |
| Figure S69. COSY spectrum of <b>23</b> in $\text{CDCl}_3$                                                                                                                   | S52 |
| Figure S70. HMBC spectrum of <b>23</b> in $\text{CDCl}_3$                                                                                                                   | S53 |
| Figure S71. NOESY spectrum of <b>23</b> in $\text{CDCl}_3$                                                                                                                  | S53 |
| Figure S72. MS of <b>24</b>                                                                                                                                                 | S54 |
| Figure S73. IR (film) of <b>24</b>                                                                                                                                          | S54 |
| Figure S74. UV of <b>24</b> in MeCN                                                                                                                                         | S55 |
| Figure S75. $^1\text{H}$ -NMR spectrum of <b>24</b> in DMSO at 500 MHz                                                                                                      | S56 |
| Figure S76. $^{13}\text{C}$ -NMR spectrum of <b>24</b> in DMSO at 125 MHz                                                                                                   | S57 |
| Figure S77. DEPT spectrum of <b>24</b> in DMSO at 125 MHz                                                                                                                   | S58 |
| Figure S78. HSQC spectrum of <b>24</b> in DMSO                                                                                                                              | S59 |
| Figure S79. COSY spectrum of <b>24</b> in DMSO                                                                                                                              | S59 |
| Figure S80. HMBC spectrum of <b>24</b> in DMSO                                                                                                                              | S60 |
| Figure S81. NOESY spectrum of <b>24</b> in DMSO                                                                                                                             | S60 |
| Figure S82. NOESY spectrum (enlarged) of <b>24</b> in DMSO                                                                                                                  | S61 |
| Figure S83. Structure and population of the low-energy conformers<br>( $> 1\%$ ) of (3 <i>S</i> ,4 <i>R</i> ,9 <i>R</i> ,13 <i>S</i> ,16 <i>S</i> ,27 <i>S</i> )- <b>24</b> | S61 |
| Figure S84. Structure and population of the low-energy conformers                                                                                                           | S62 |

(> 1%) of (3*S*,4*R*,9*S*,13*S*,16*S*,27*S*)-**24**.

|                                                          |     |
|----------------------------------------------------------|-----|
| Figure S85. Effects of <b>6</b> on SCOs <i>in vitro</i>  | S62 |
| Figure S86. Effects of <b>9</b> on SCOs <i>in vitro</i>  | S63 |
| Figure S87. Effects of <b>14</b> on SCOs <i>in vitro</i> | S63 |
| Figure S88. Effects of <b>17</b> on SCOs <i>in vitro</i> | S64 |
| Figure S89. Effects of <b>18</b> on SCOs <i>in vitro</i> | S64 |
| Figure S90. Effects of <b>24</b> on SCOs <i>in vitro</i> | S65 |

Table S1. <sup>1</sup>H and <sup>13</sup>C NMR Data for **20**

| position    | <b>20</b> (in DMSO)                              |                                     | <b>20</b> (in CDCl <sub>3</sub> )                |                                     |
|-------------|--------------------------------------------------|-------------------------------------|--------------------------------------------------|-------------------------------------|
|             | $\delta_{\text{H}}^{\text{a}}$ ( <i>J</i> in Hz) | $\delta_{\text{C}}^{\text{b}}$ type | $\delta_{\text{H}}^{\text{a}}$ ( <i>J</i> in Hz) | $\delta_{\text{C}}^{\text{b}}$ type |
| 1-NH        | 10.79 s                                          |                                     | 7.69 s                                           |                                     |
| 2           |                                                  | 154.2, C                            |                                                  | 152.9, C                            |
| 3           |                                                  | 51.4, C                             |                                                  | 52.1, C                             |
| 4           |                                                  | 38.6, C                             |                                                  | 39.4, C                             |
| 5 $\alpha$  | 1.94, ov <sup>c</sup>                            | 26.2, CH <sub>2</sub>               | 1.86, ov <sup>c</sup>                            | 27.2, CH <sub>2</sub>               |
| 5 $\beta$   | 2.40 dd (12.0, 9.5)                              |                                     | 2.60, ov <sup>c</sup>                            |                                     |
| 6 $\alpha$  | 1.95, ov <sup>c</sup>                            | 30.1, CH <sub>2</sub>               | 2.16 m                                           | 30.6, CH <sub>2</sub>               |
| 6 $\beta$   | 2.55 m                                           |                                     | 2.61, ov <sup>c</sup>                            |                                     |
| 7           |                                                  | 93.6, C                             |                                                  | 94.0, C                             |
| 9           | 4.64 d (2.5)                                     | 78.6, CH                            | 4.76 d (2.5)                                     | 79.6, CH                            |
| 10          |                                                  | 195.8, C                            |                                                  | 196.2, C                            |
| 11          | 6.13 s                                           | 120.0, CH                           | 6.21 s                                           | 120.4, CH                           |
| 12          |                                                  | 159.2, C                            |                                                  | 159.9, C                            |
| 13          |                                                  | 77.1, C                             |                                                  | 78.7, C                             |
| 14 $\alpha$ | 2.12 dt (13.2, 3.0)                              | 31.6, CH <sub>2</sub>               | 1.99, ov <sup>c</sup>                            | 33.8, CH <sub>2</sub>               |
| 14 $\beta$  | 1.76 td (13.2, 4.5)                              |                                     | 1.95, ov <sup>c</sup>                            |                                     |
| 15 $\alpha$ | 1.95, ov <sup>c</sup>                            | 20.9, CH <sub>2</sub>               | 2.08, ov <sup>c</sup>                            | 21.3, CH <sub>2</sub>               |
| 15 $\beta$  | 1.66 m                                           |                                     | 1.82, ov <sup>c</sup>                            |                                     |
| 16          | 2.72 m                                           | 48.5, CH                            | 2.82 m                                           | 48.7, CH                            |
| 17 $\alpha$ | 2.31 dd (13.0, 10.5)                             | 27.1, CH <sub>2</sub>               | 2.42 dd (13.0, 10.5)                             | 27.7, CH <sub>2</sub>               |
| 17 $\beta$  | 2.61 dd (13.0, 6.0)                              |                                     | 2.71 dd (13.0, 6.5)                              |                                     |
| 18          |                                                  | 115.1, C                            |                                                  | 117.4, C                            |
| 19          |                                                  | 123.4, C                            |                                                  | 123.9, C                            |
| 20          | 7.27 d (8.0)                                     | 118.8, CH                           | 7.32 d (8.0)                                     | 119.3, CH                           |
| 21          | 6.92 dd (8.0, 1.7)                               | 118.7, CH                           | 7.04 dd (8.0, 1.5)                               | 120.4, CH                           |
| 22          |                                                  | 123.8, C                            |                                                  | 126.4, C                            |
| 23          | 7.26 d (1.7)                                     | 111.4, CH                           | 7.27 d (1.5)                                     | 111.6, CH                           |
| 24          |                                                  | 140.3, C                            |                                                  | 140.2, C                            |
| 25          | 1.31 s                                           | 16.3, CH <sub>3</sub>               | 1.37 s                                           | 16.4, CH <sub>3</sub>               |
| 26          | 1.01 s                                           | 23.5, CH <sub>3</sub>               | 1.15 s                                           | 24.5, CH <sub>3</sub>               |
| 27          |                                                  | 75.8, C                             |                                                  | 76.4, C                             |
| 28 $\alpha$ | 4.12 dd (13.2, 2.5)                              | 64.2, CH <sub>2</sub>               | 4.24 dd (13.0, 2.5)                              | 65.1, CH <sub>2</sub>               |
| 28 $\beta$  | 3.69 d (13.2)                                    |                                     | 3.66 d (13.0)                                    |                                     |
| 29          | 1.18 s                                           | 16.5, CH <sub>3</sub>               | 1.34 s                                           | 16.9, CH <sub>3</sub>               |
| 1'          |                                                  | 171.3, C                            |                                                  | 171.8, C                            |
| 2'          |                                                  | 78.0, C                             |                                                  | 78.8, C                             |
| 3'          | 1.52 s                                           | 24.0, CH <sub>3</sub>               | 1.62 s                                           | 24.5, CH <sub>3</sub>               |

|       |        |                       |        |                       |
|-------|--------|-----------------------|--------|-----------------------|
| 4'    | 1.54 s | 24.3, CH <sub>3</sub> | 1.62 s | 24.9, CH <sub>3</sub> |
| 5'    |        | 169.5, C              |        | 170.1, C              |
| 6'    | 2.05 s | 20.9, CH <sub>3</sub> | 2.09 s | 21.3, CH <sub>3</sub> |
| 13-OH | 5.17 s |                       |        |                       |

<sup>b</sup>500 MHz; <sup>b</sup>125MHz; <sup>c</sup>overlapped signals.

Table S2. Comparison of the experimental and the mPW1PW91/6-311+G(2d,p)//B3LYP/6-31+G(d,p)  $^{13}\text{C}$  NMR data of (3*S*,4*R*,9*R*,13*S*,16*S*,27*S*)-**24** and (3*S*,4*R*,9*S*,13*S*,16*S*,27*S*)-**24**.

| Carbon | Exp.  | calcd (9 <i>R</i> ) | calcd (9 <i>S</i> ) | $\Delta\delta$ (9 <i>R</i> ) | $\Delta\delta$ (9 <i>S</i> ) |
|--------|-------|---------------------|---------------------|------------------------------|------------------------------|
| C-2    | 153.9 | 150.21              | 150.42              | 3.69                         | 3.48                         |
| C-3    | 50.4  | 54.80               | 54.90               | 4.40                         | 4.50                         |
| C-4    | 42.7  | 47.91               | 47.71               | 5.21                         | 5.01                         |
| C-5    | 30.6  | 32.71               | 33.00               | 2.11                         | 2.40                         |
| C-6    | 111.5 | 117.68              | 118.90              | 6.18                         | 7.40                         |
| C-7    | 145.0 | 147.95              | 147.95              | 2.95                         | 2.95                         |
| C-9    | 82.1  | 81.62               | 82.57               | 0.48                         | 0.47                         |
| C-10   | 194.7 | 200.87              | 198.58              | 6.17                         | 3.88                         |
| C-11   | 116.1 | 116.33              | 116.65              | 0.23                         | 0.55                         |
| C-12   | 154.5 | 156.48              | 157.67              | 1.98                         | 3.17                         |
| C-13   | 73.8  | 78.40               | 77.22               | 4.60                         | 3.42                         |
| C-14   | 31.7  | 33.46               | 33.17               | 1.76                         | 1.47                         |
| C-15   | 21.1  | 22.40               | 22.48               | 1.30                         | 1.38                         |
| C-16   | 49.3  | 50.14               | 50.18               | 0.84                         | 0.88                         |
| C-17   | 26.8  | 28.25               | 28.29               | 1.45                         | 1.49                         |
| C-18   | 115.3 | 118.96              | 118.87              | 3.66                         | 3.57                         |
| C-19   | 123.3 | 123.87              | 123.87              | 0.57                         | 0.57                         |
| C-20   | 118.9 | 118.99              | 118.96              | 0.09                         | 0.06                         |
| C-21   | 118.8 | 121.41              | 121.34              | 2.61                         | 2.54                         |
| C-22   | 123.9 | 135.76              | 135.68              | 11.86                        | 11.78                        |
| C-23   | 111.3 | 110.79              | 110.78              | 0.51                         | 0.52                         |
| C-24   | 140.3 | 139.80              | 139.77              | 0.50                         | 0.53                         |
| C-25   | 16.4  | 15.28               | 15.29               | 1.12                         | 1.11                         |
| C-26   | 19.7  | 18.06               | 18.28               | 1.64                         | 1.42                         |
| C-27   | 74.3  | 75.86               | 75.13               | 1.56                         | 0.83                         |
| C-28   | 67.9  | 69.30               | 69.89               | 1.40                         | 1.99                         |
| C-29   | 21.9  | 21.65               | 18.97               | 0.25                         | 2.93                         |
| C-1'   | 175.5 | 179.61              | 180.01              | 4.11                         | 4.51                         |
| C-2'   | 71.3  | 73.74               | 74.04               | 2.44                         | 2.74                         |
| C-3'   | 27.3  | 26.32               | 24.89               | 0.98                         | 2.41                         |
| C-4'   | 27.3  | 24.81               | 25.89               | 2.49                         | 1.41                         |
| CMAE   | N/A   | N/A                 | N/A                 | 2.55                         | 2.63                         |



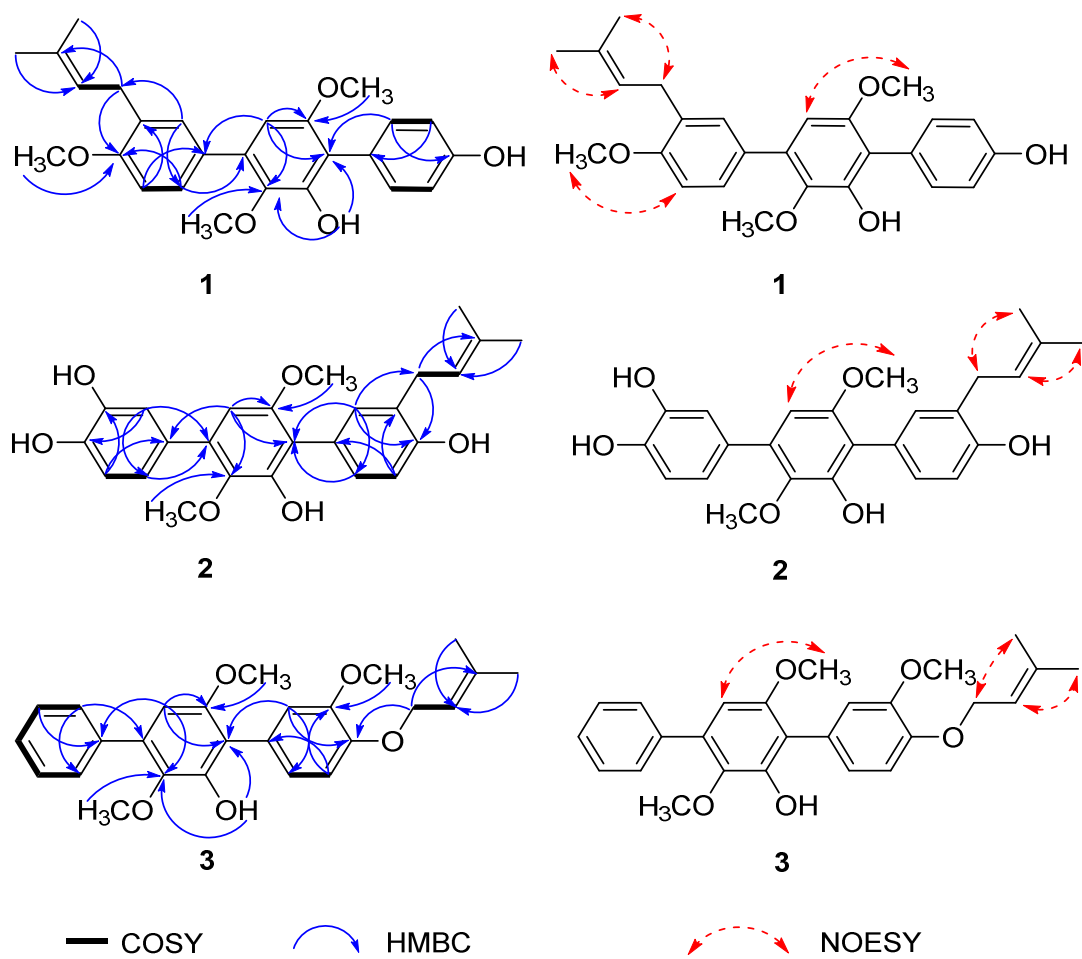

Figure S1. Selected COSY, HMBC, and NOESY correlations of **1-3**

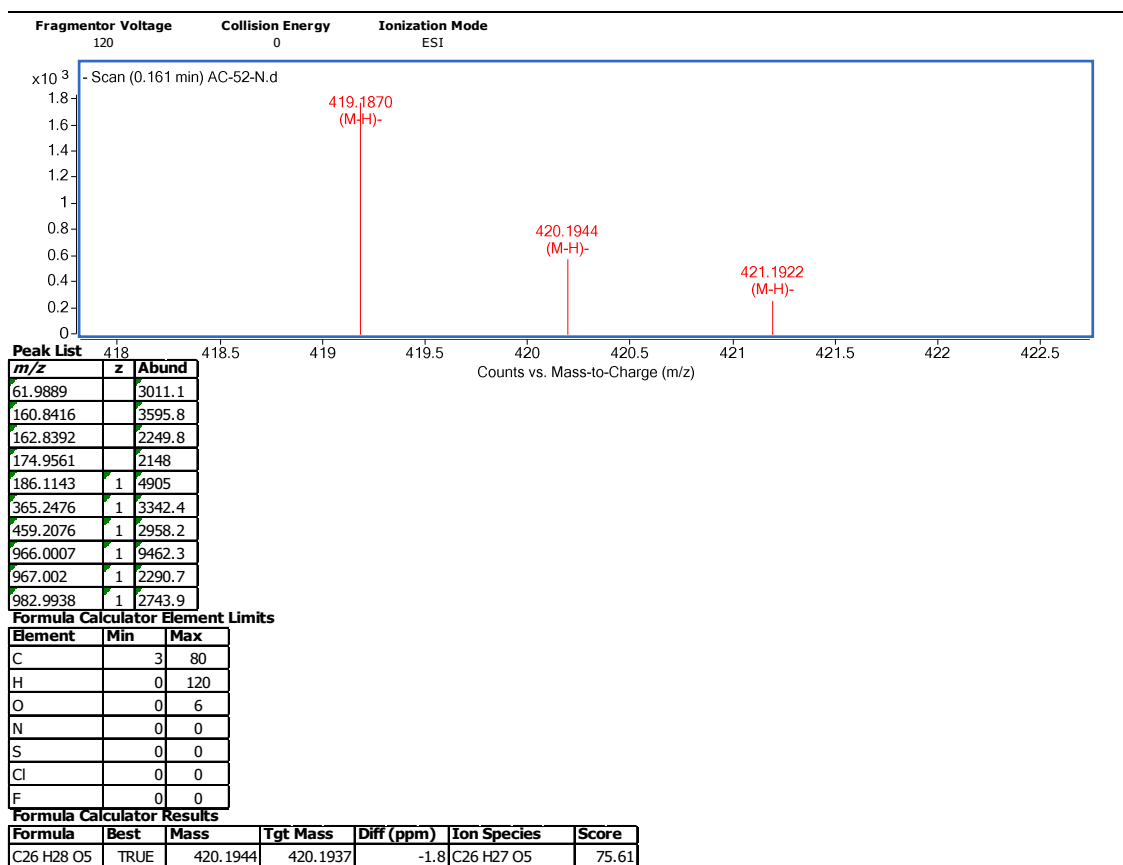

Figure S2. MS of **1**

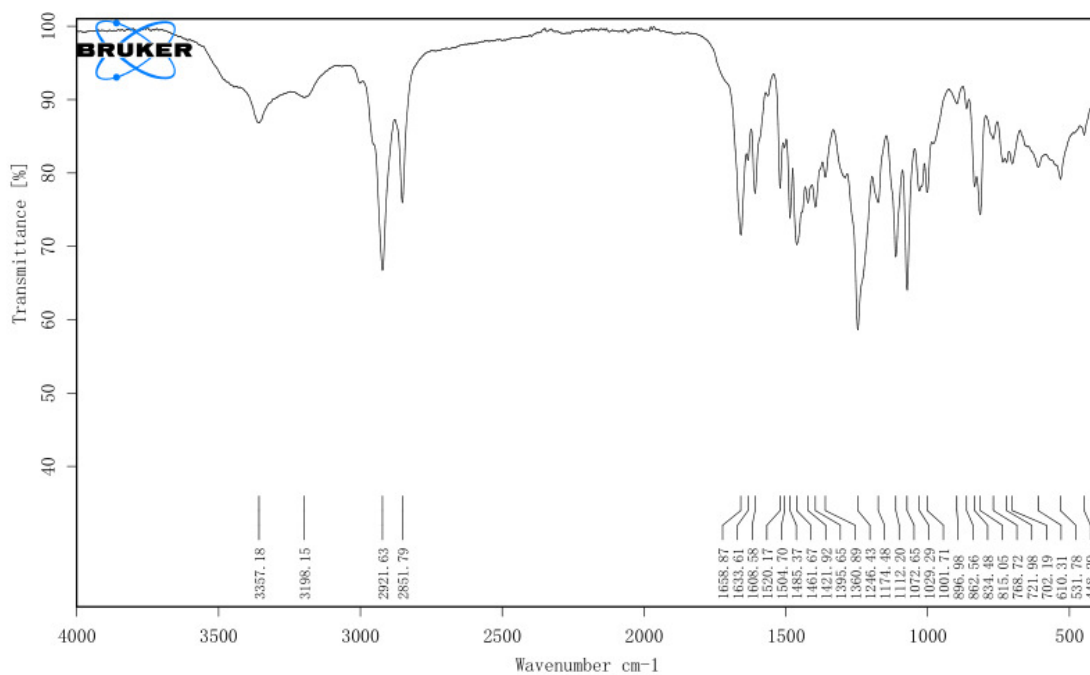

Figure S3. IR (film) of **1**

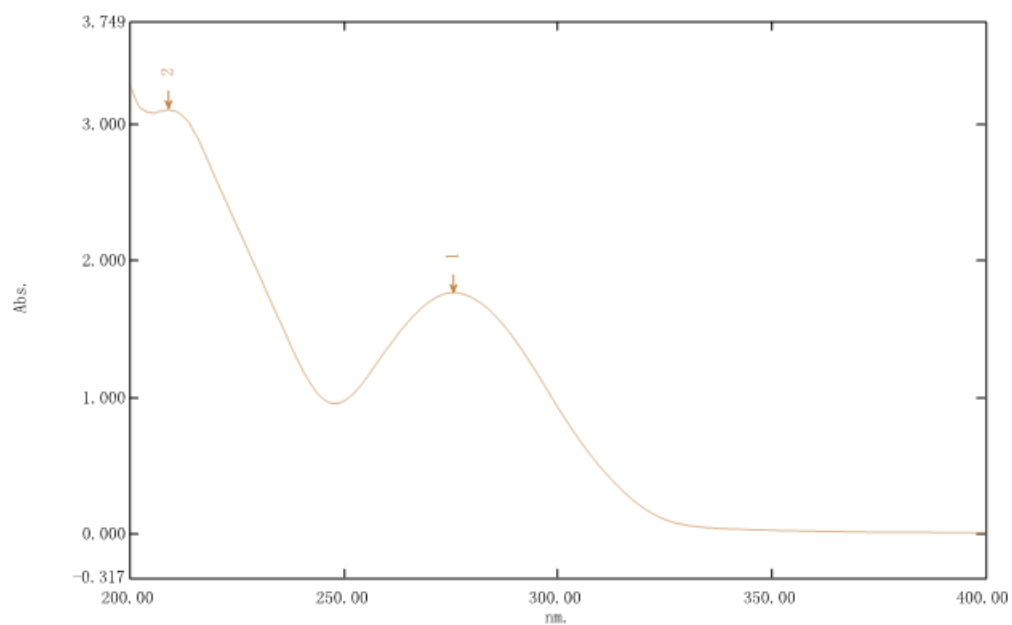

< 峰值检测表 >

| No. | P/V | 波长 (nm) | Abs.  | 描述 |
|-----|-----|---------|-------|----|
| 1   |     | 275.80  | 1.770 |    |
| 2   |     | 209.00  | 3.112 |    |
| 3   |     | 247.80  | 0.956 |    |
| 4   |     | 205.40  | 3.080 |    |

Figure S4. UV of **1** in MeCN

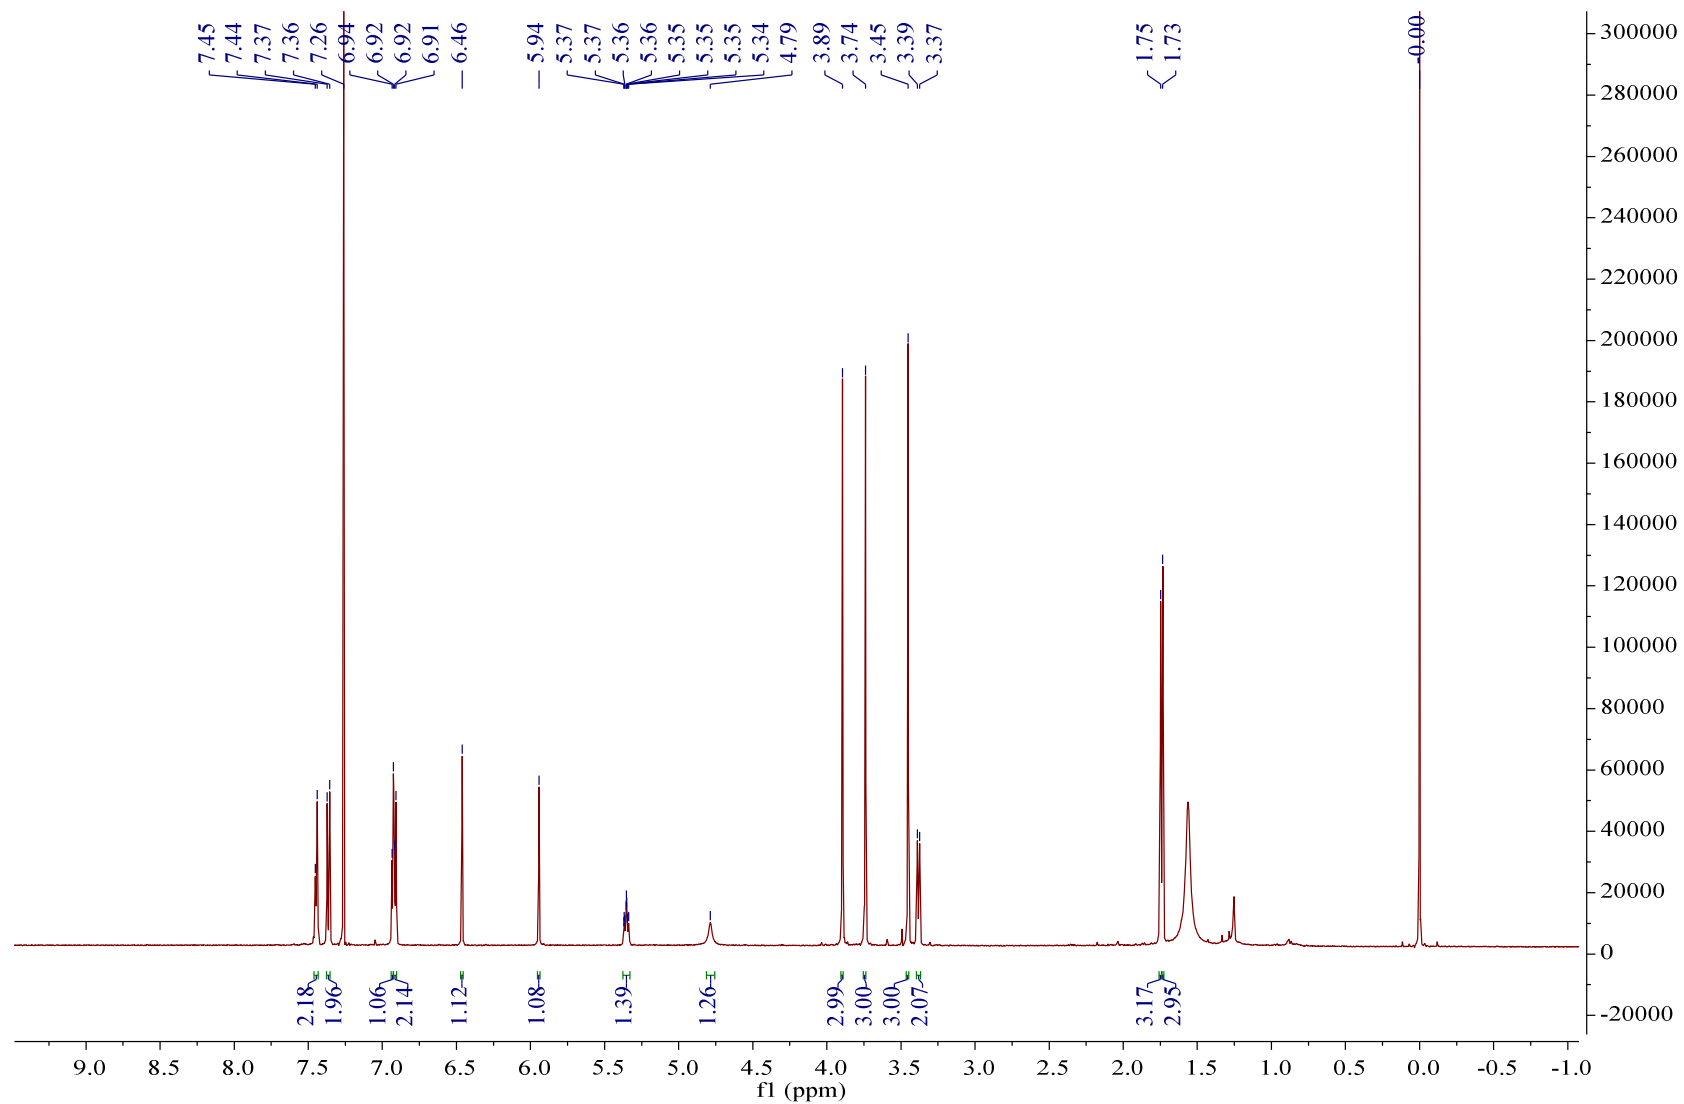

Figure S5. <sup>1</sup>H-NMR spectrum of **1** in CDCl<sub>3</sub> at 500 MHz

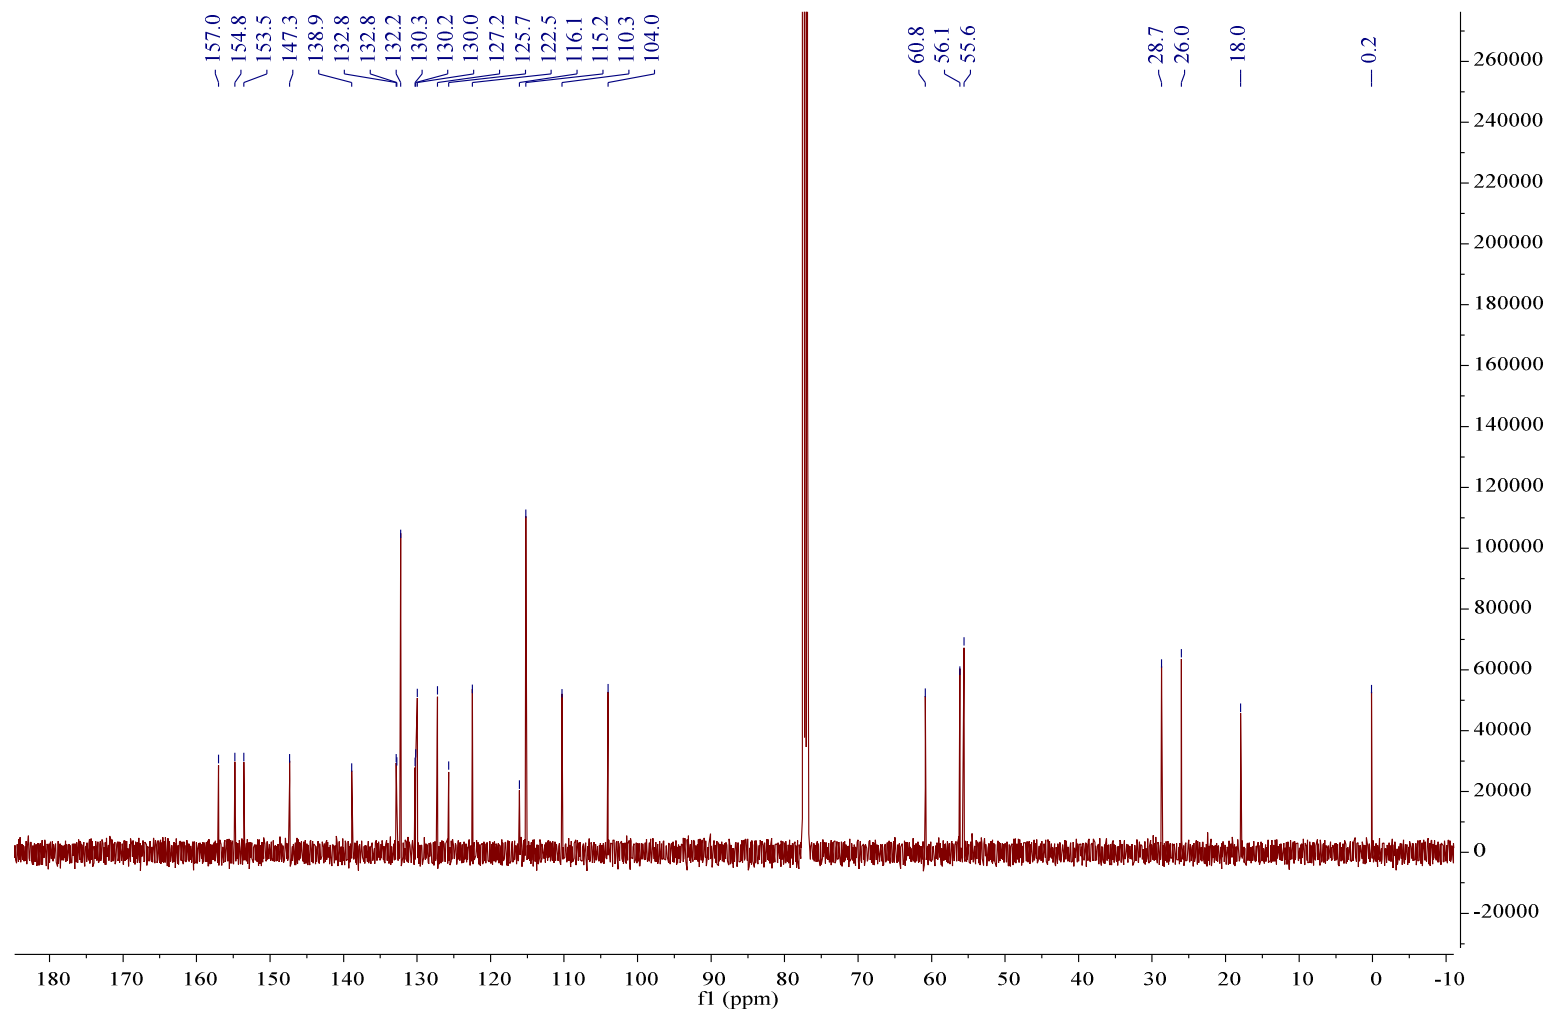

Figure S6.  $^{13}\text{C}$ -NMR spectrum of **1** in  $\text{CDCl}_3$  at 125 MHz

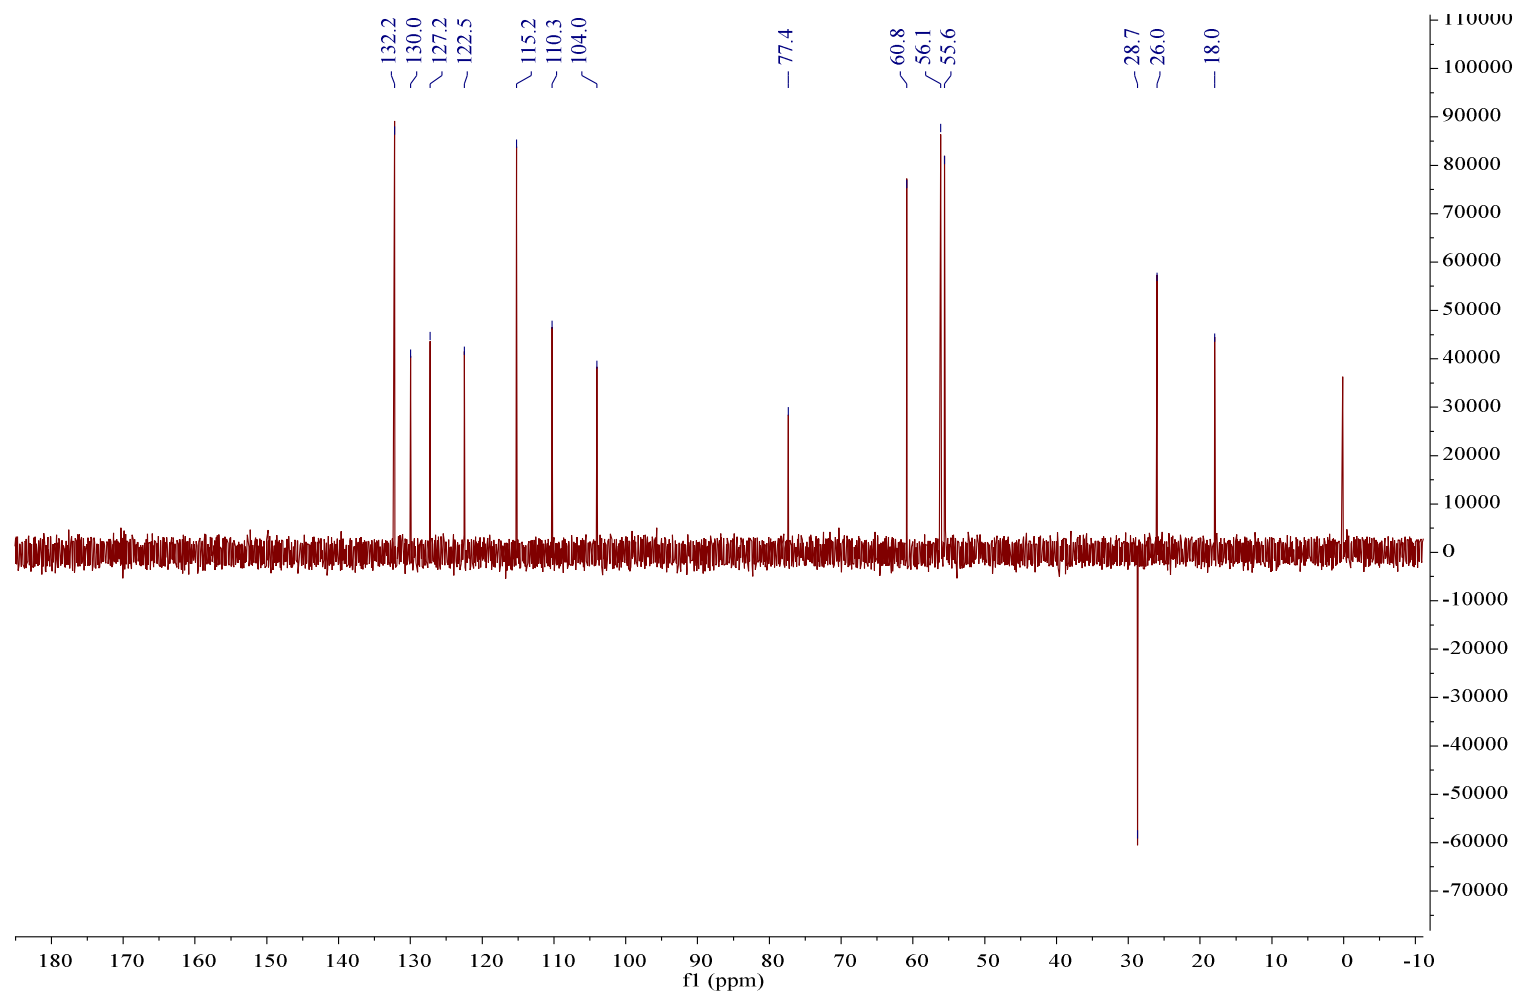

Figure S7. DEPT spectrum of **1** in CDCl<sub>3</sub> at 125 MHz

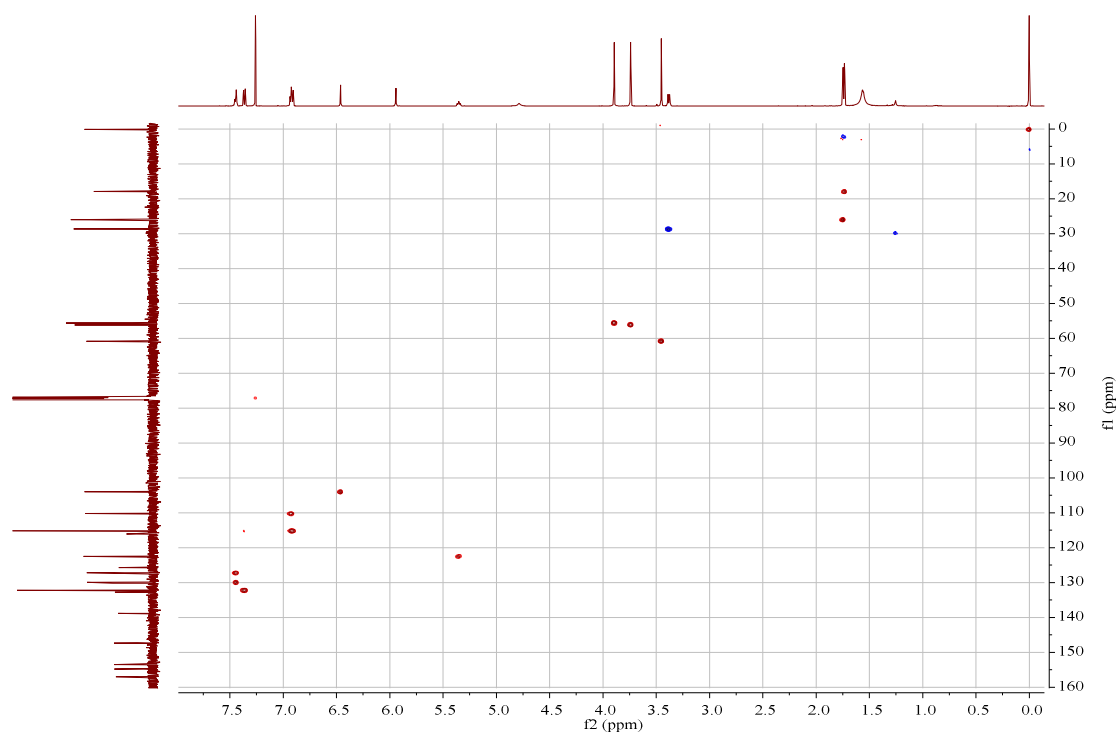

Figure S8. HSQC spectrum of **1** in CDCl<sub>3</sub>

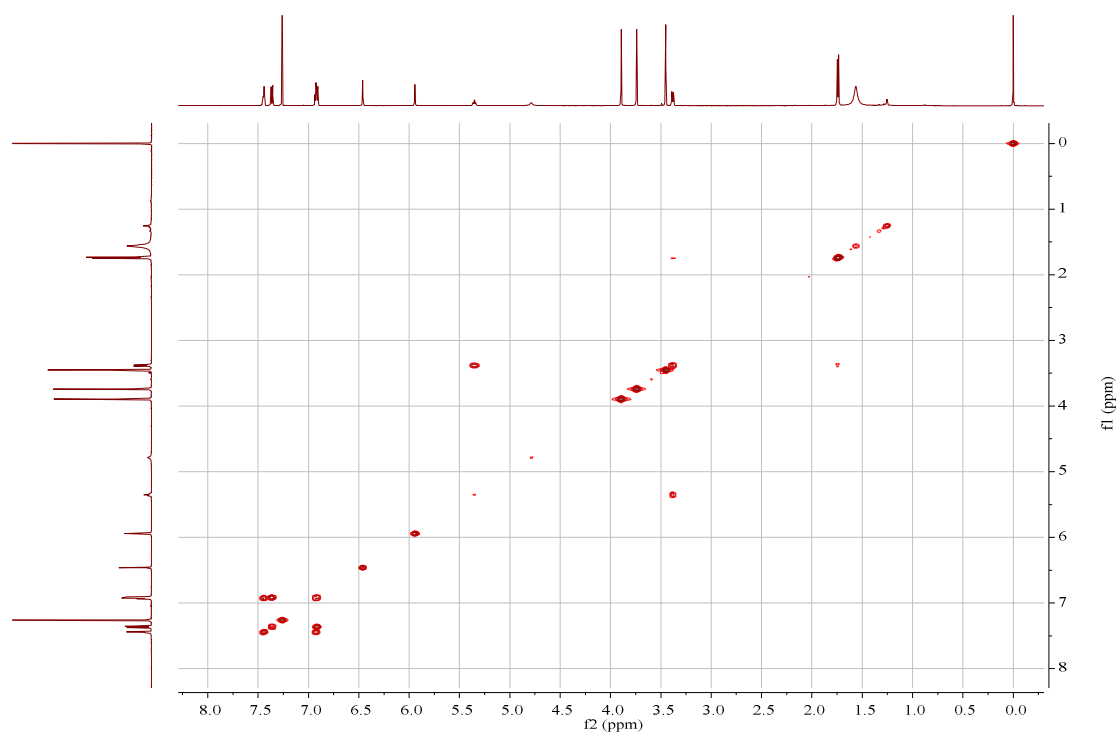

Figure S9. COSY spectrum of **1** in CDCl<sub>3</sub>

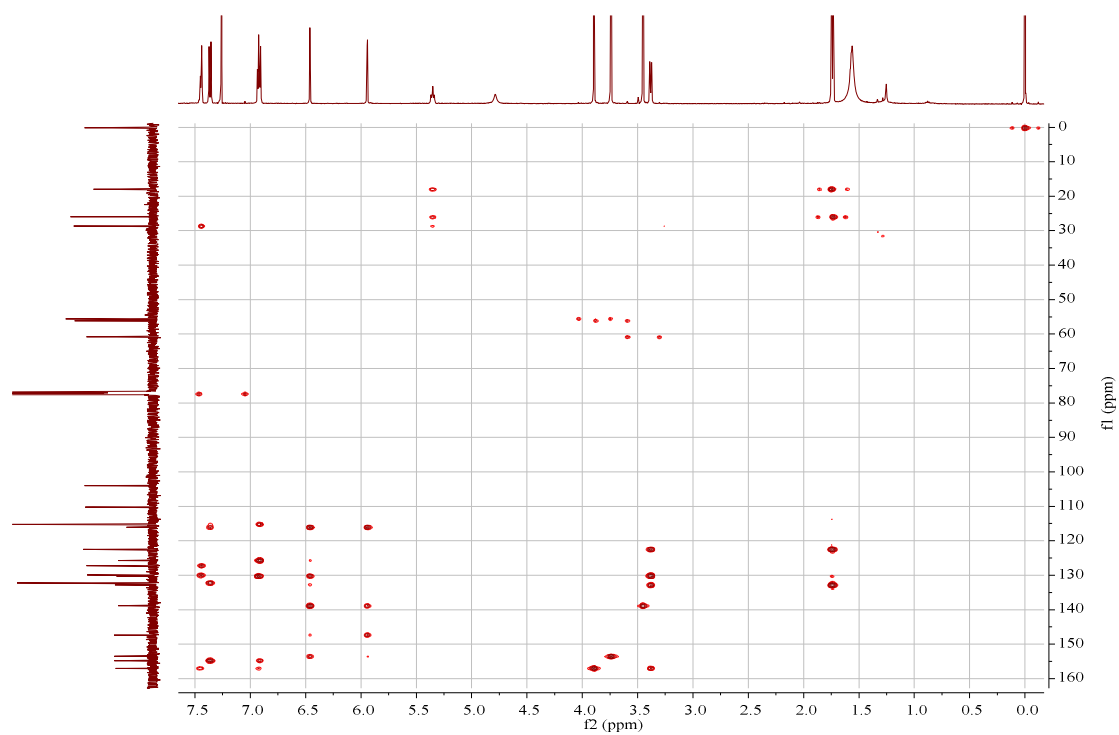

Figure S10. HMBC spectrum of **1** in CDCl<sub>3</sub>

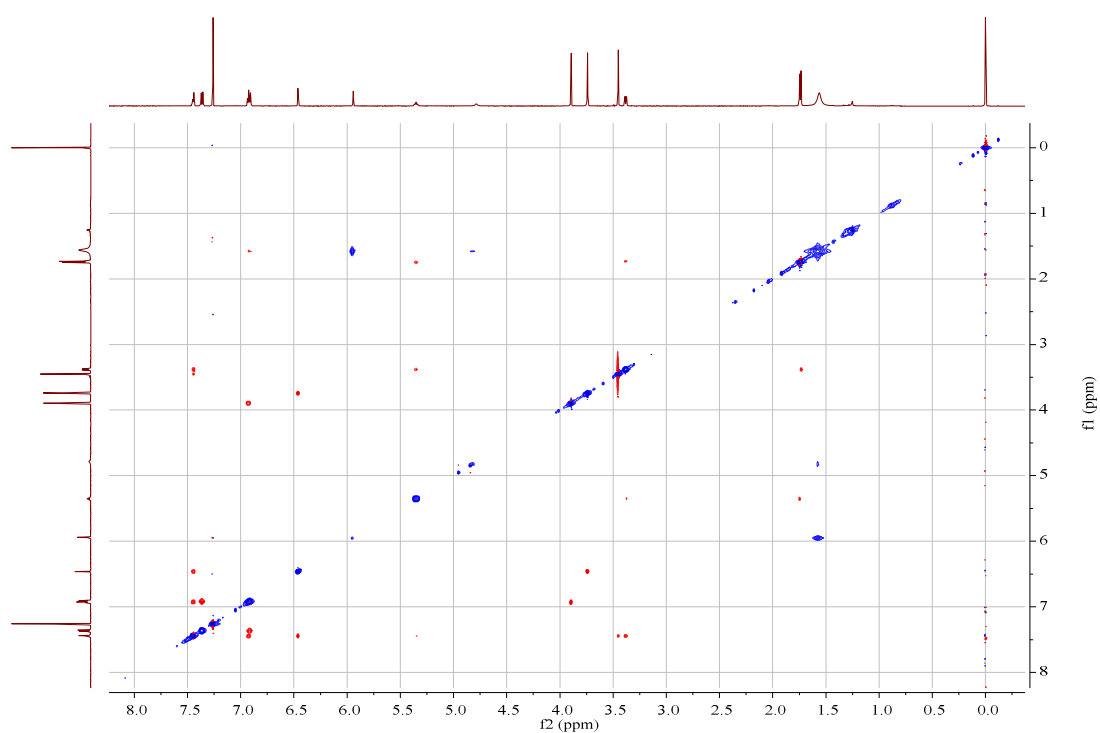

Figure S11. NOESY spectrum of **1** in CDCl<sub>3</sub>



# User Spectra

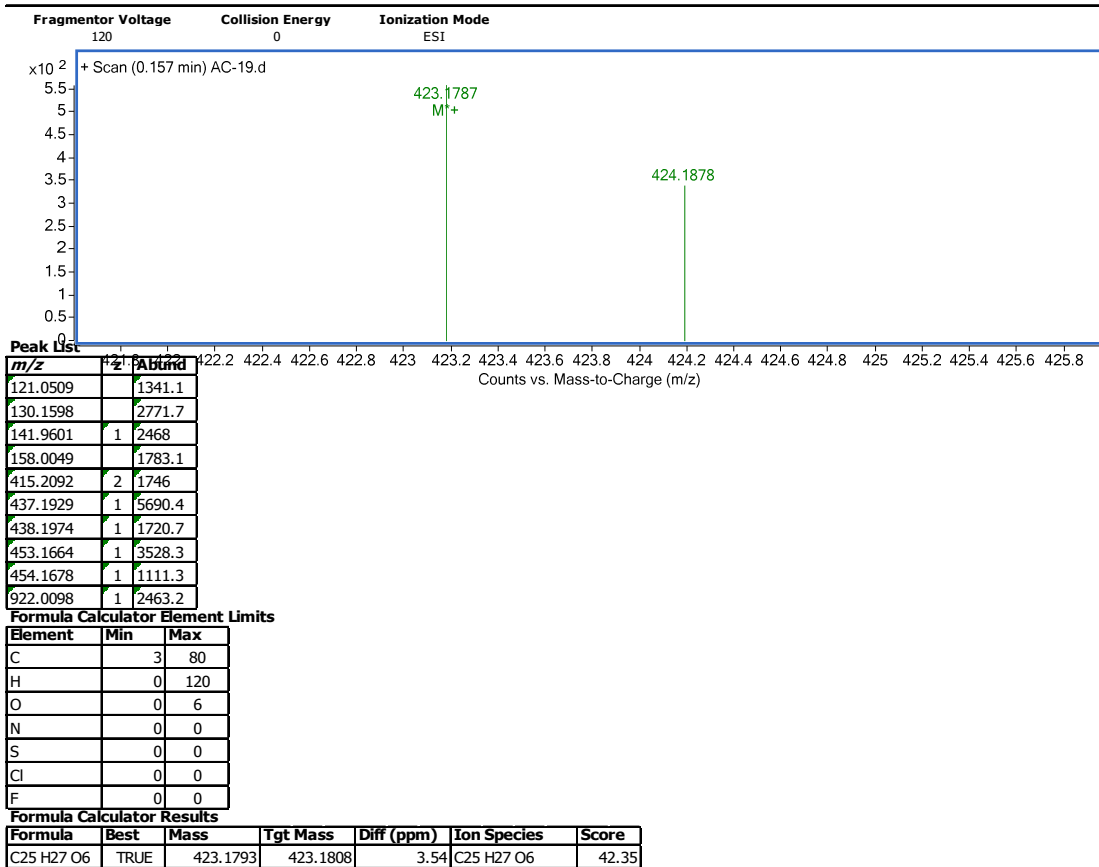

Figure S12. MS of **2**

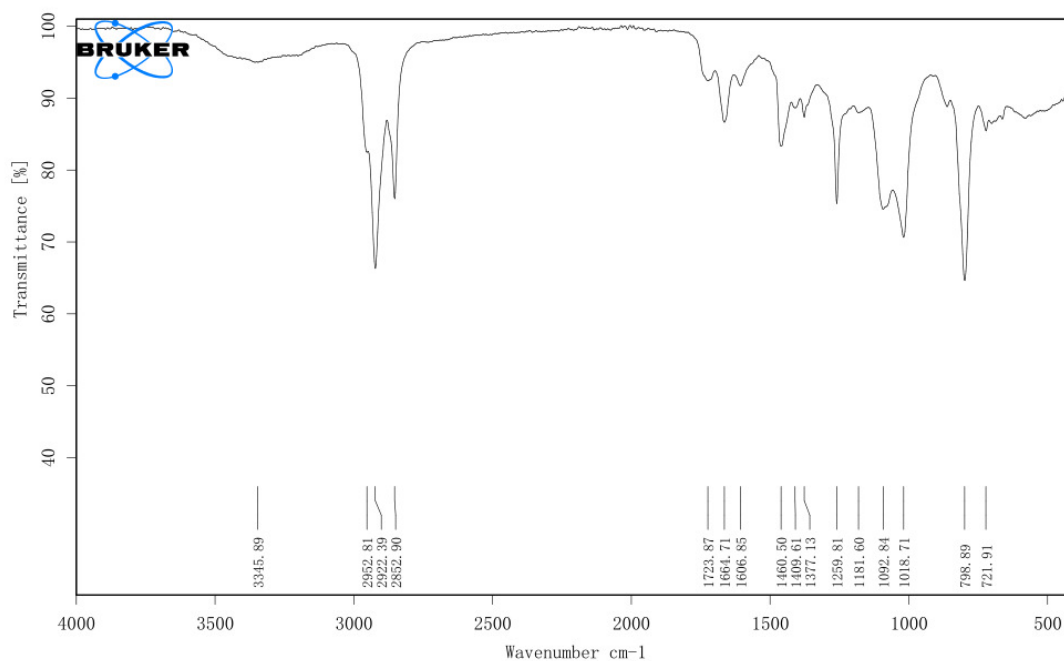

Figure S13. IR (film) of **2**

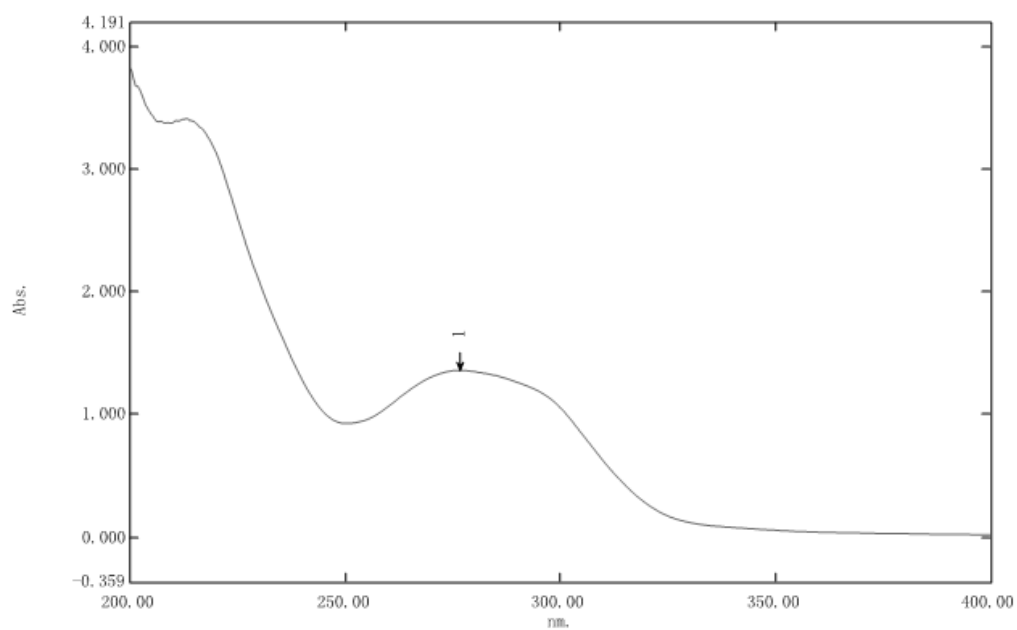

< 峰值检测表 >

| No. | P/V                                                                                | 波长 (nm) | Abs.  | 描述 |
|-----|------------------------------------------------------------------------------------|---------|-------|----|
| 1   |   | 276.60  | 1.359 |    |
| 2   |  | 250.20  | 0.927 |    |

Figure S14. UV of **2** in MeCN

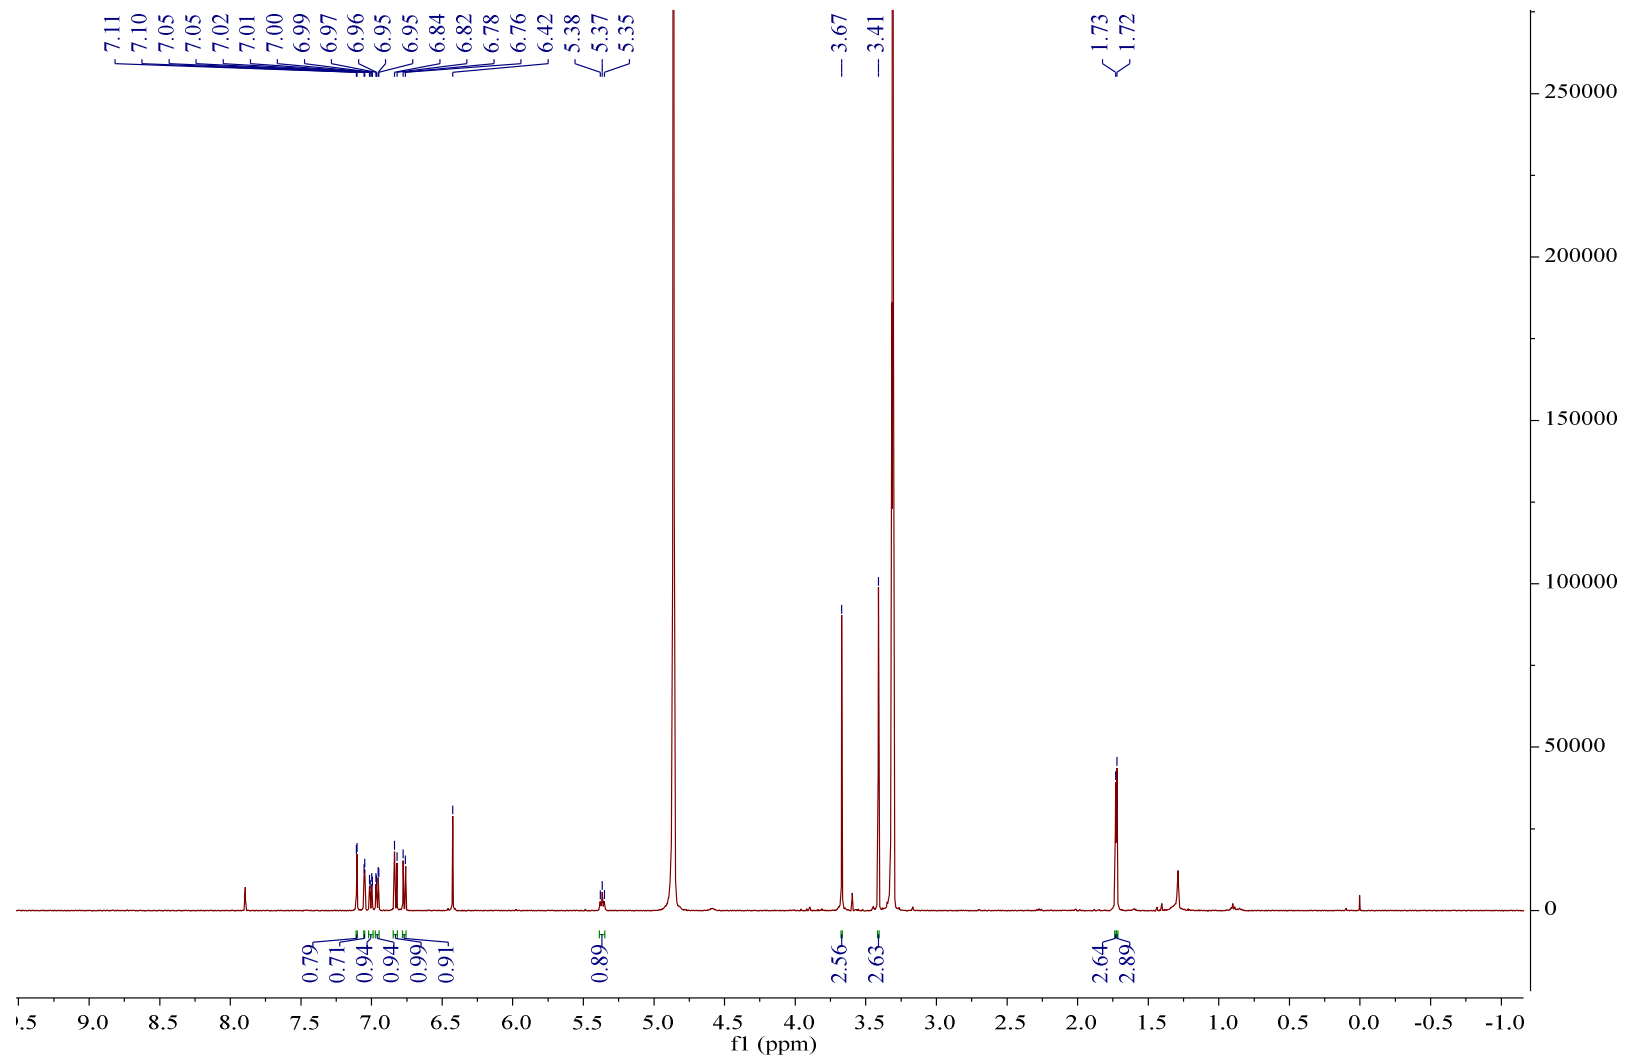

Figure S15. <sup>1</sup>H-NMR spectrum of **2** in CD<sub>3</sub>OD at 500 MHz

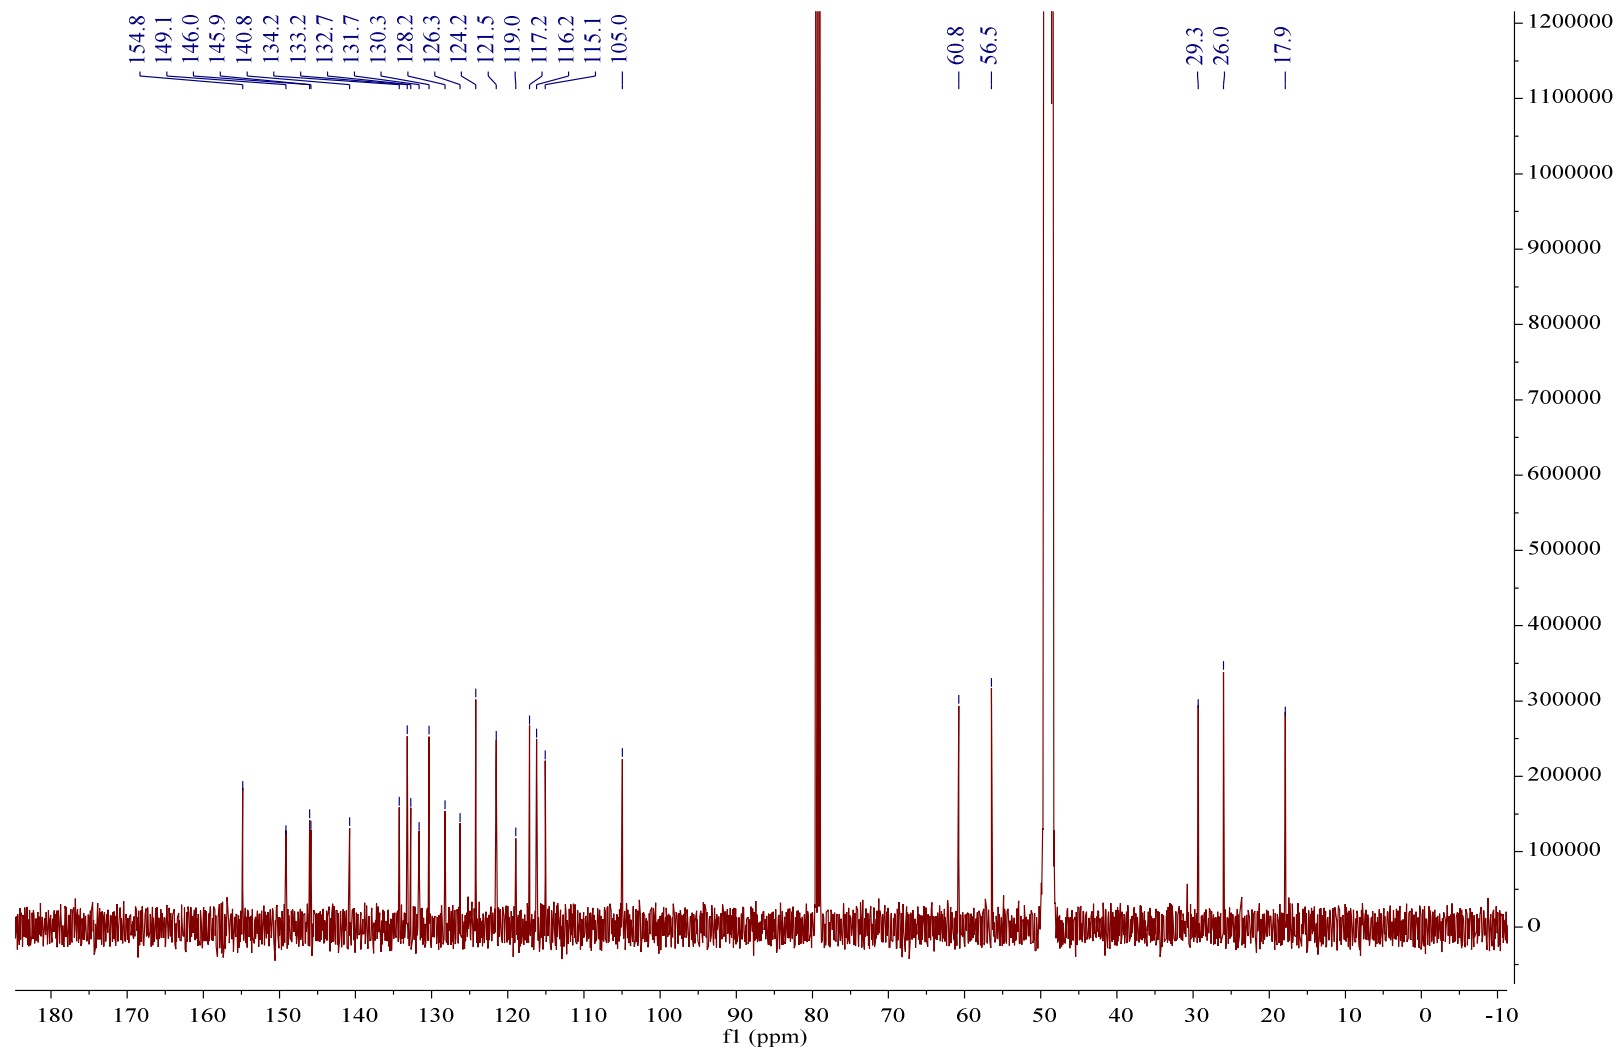

Figure S16. <sup>13</sup>C-NMR spectrum of **2** in CD<sub>3</sub>OD at 125 MHz

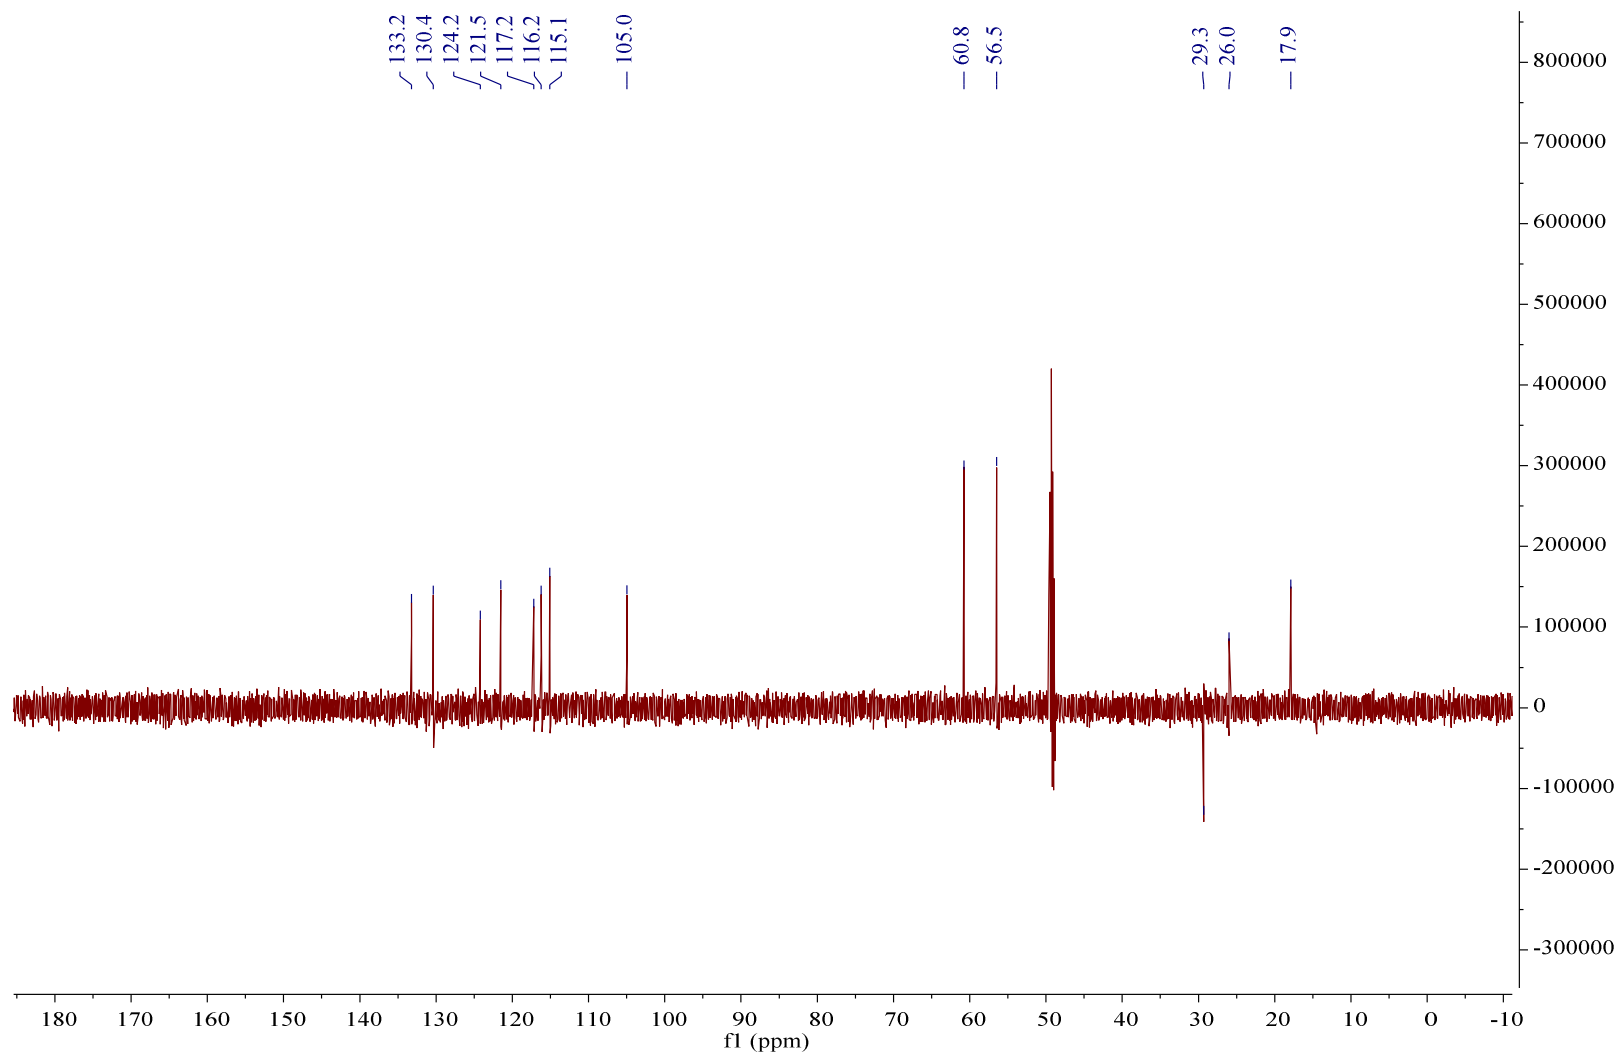

Figure S17. DEPT spectrum of **2** in CD<sub>3</sub>OD at 125 MHz

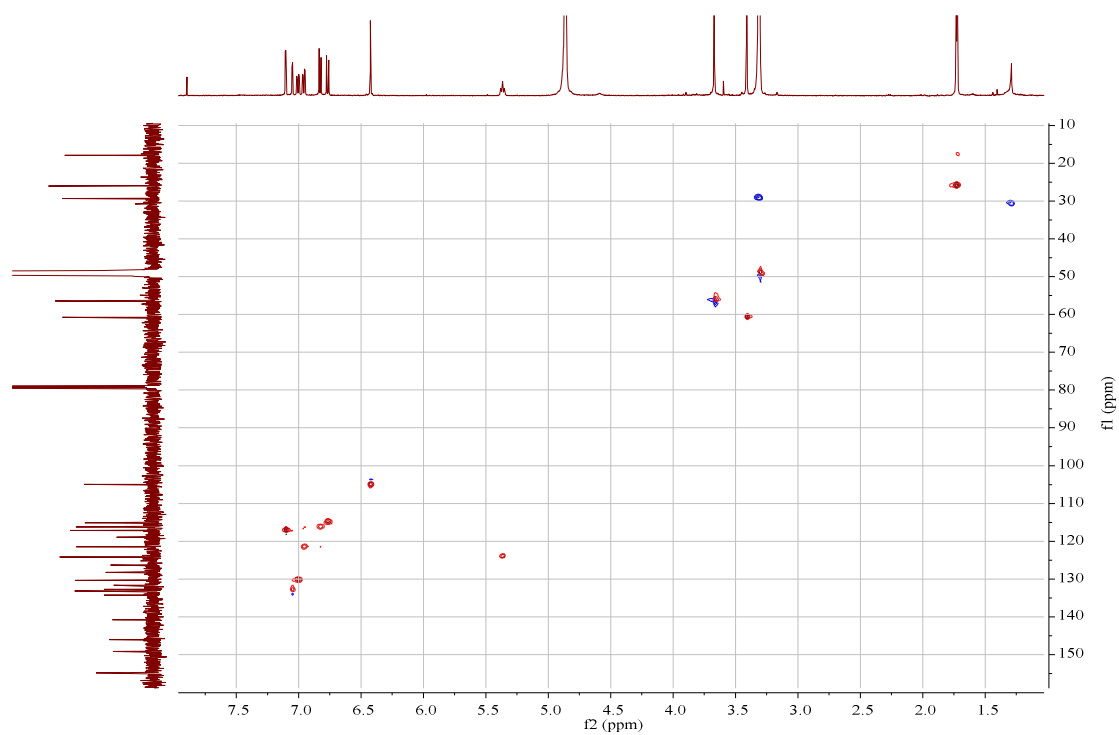

Figure S18. HSQC spectrum of **2** in CD<sub>3</sub>OD

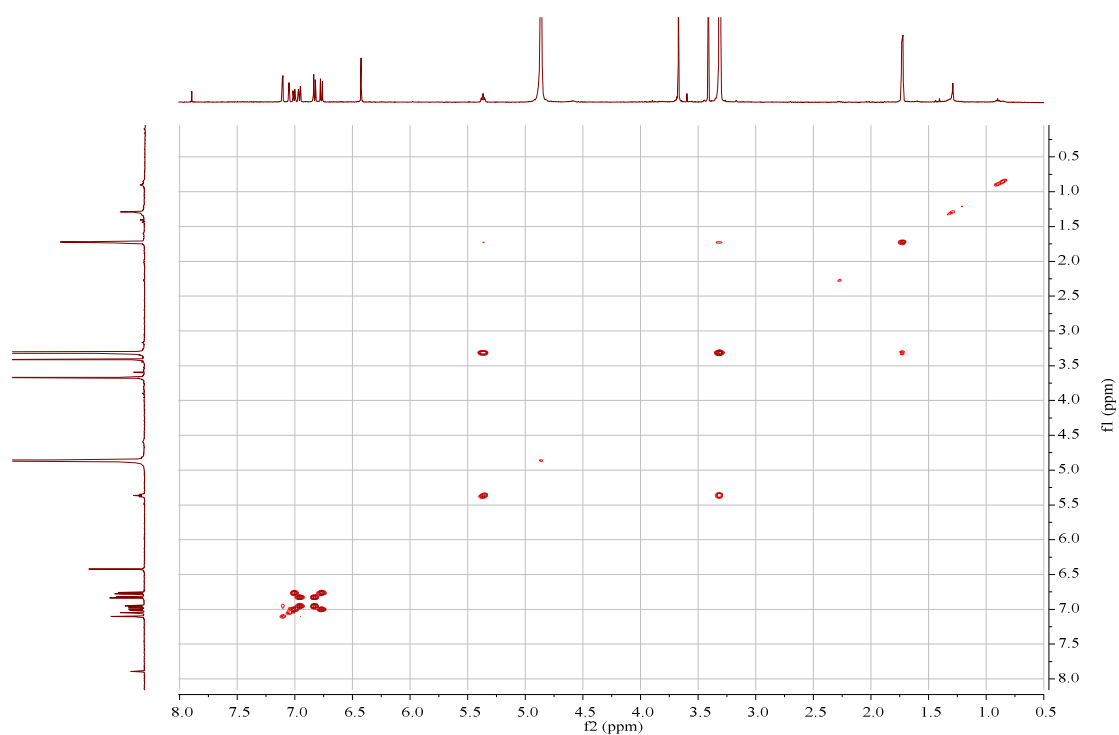

Figure S19. COSY spectrum of **2** in CD<sub>3</sub>OD

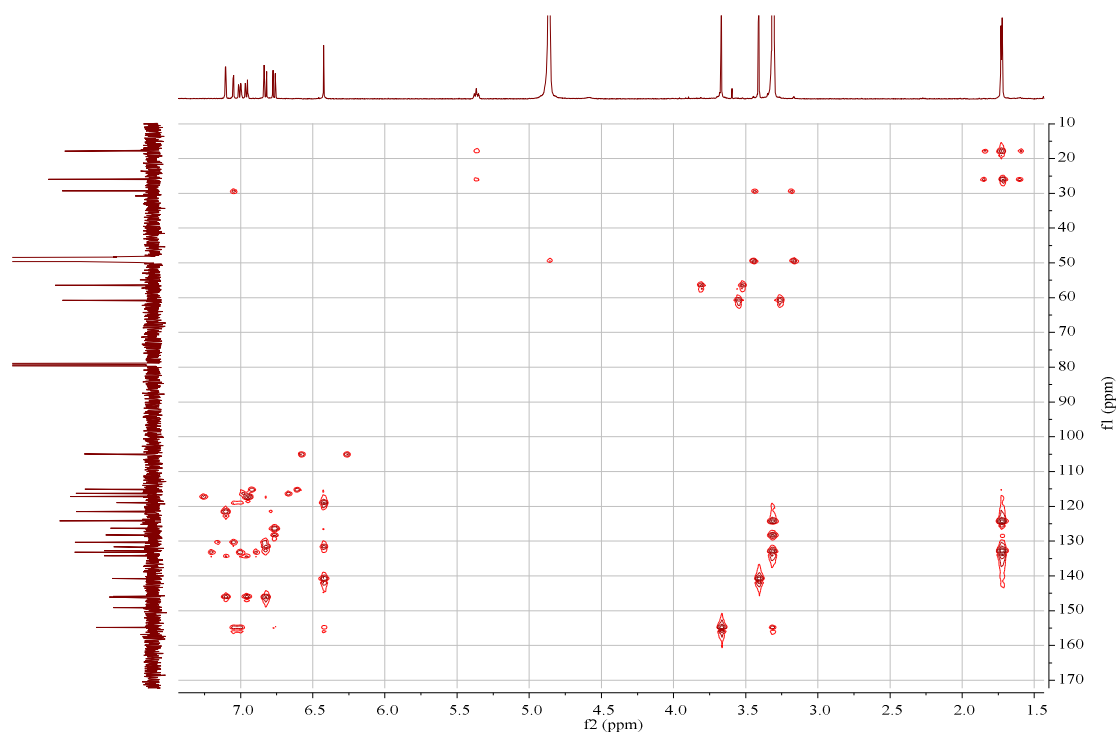

Figure S20. HMBC spectrum of **2** in CD<sub>3</sub>OD

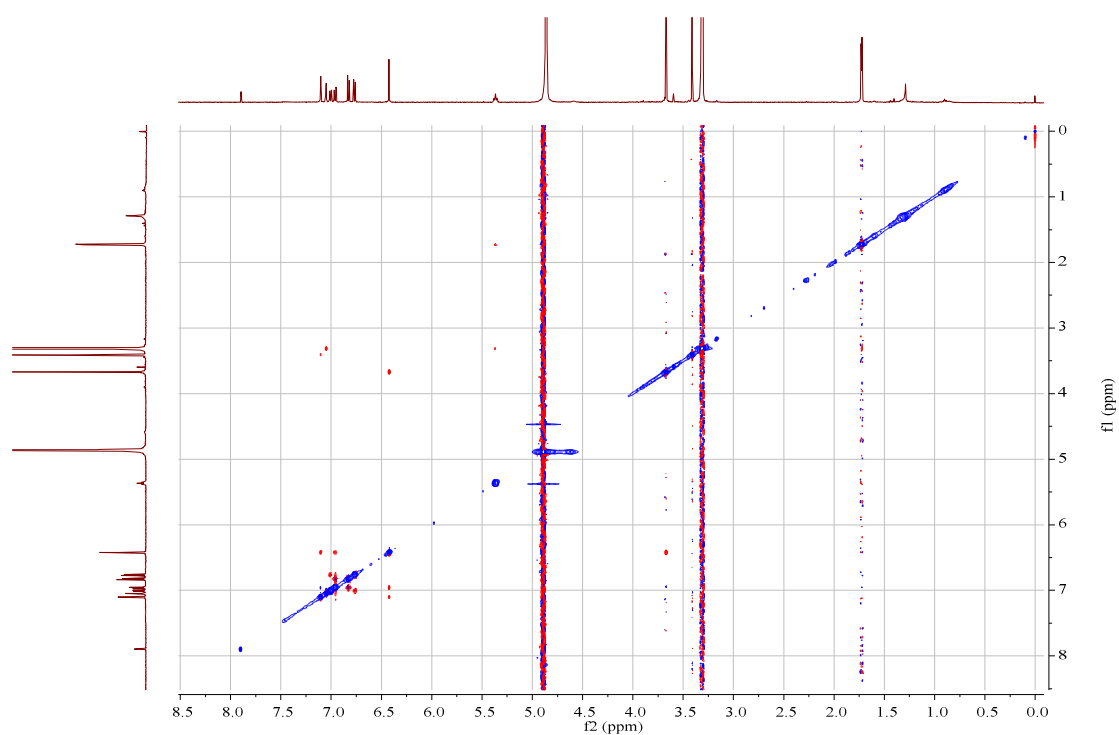

Figure S21. NOESY spectrum of **2** in CD<sub>3</sub>OD

# User Spectra

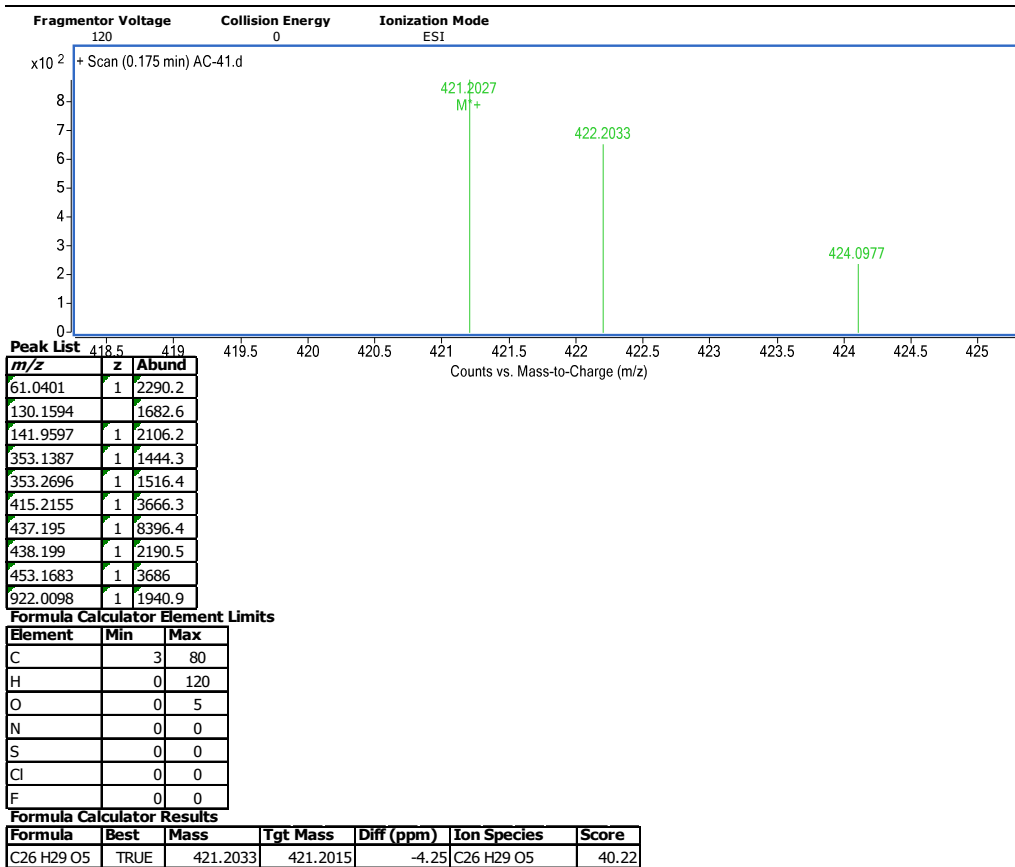

Figure S22. MS of **3**

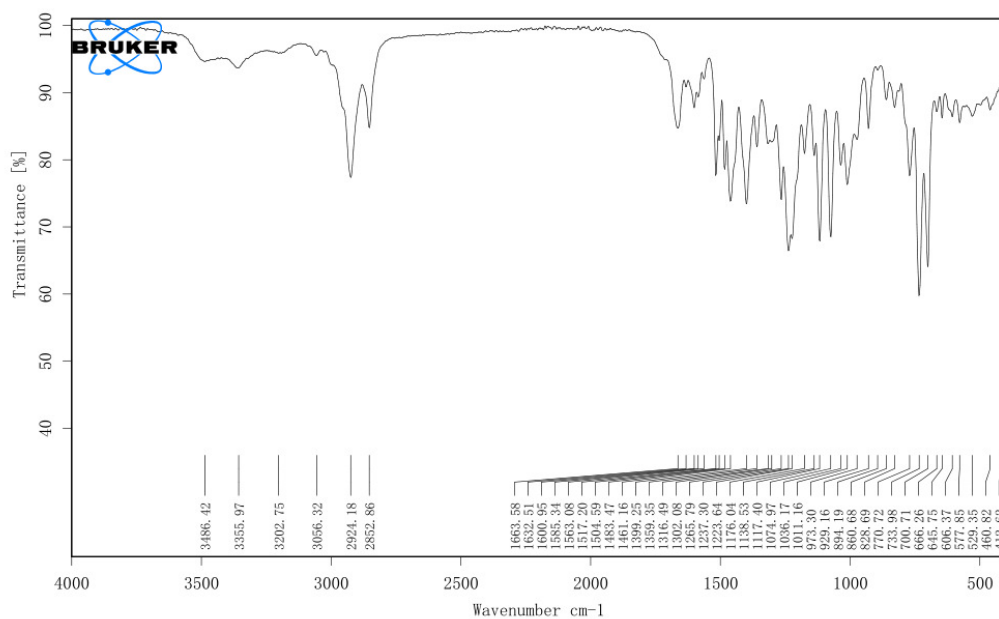

Figure S23. IR (film) of **3**



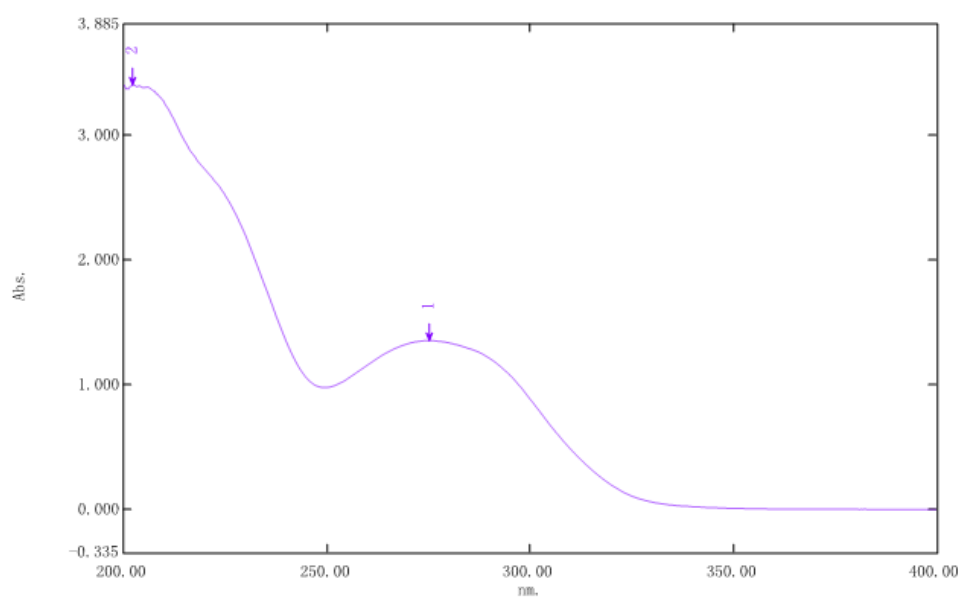

< 峰值检测表 >

| No. | P/V | 波长 (nm) | Abs.  | 描述 |
|-----|-----|---------|-------|----|
| 1   | ⬆   | 275.20  | 1.355 |    |
| 2   | ⬆   | 202.40  | 3.399 |    |
| 3   | ⬇   | 249.60  | 0.980 |    |

Figure S24. UV of **3** in MeCN

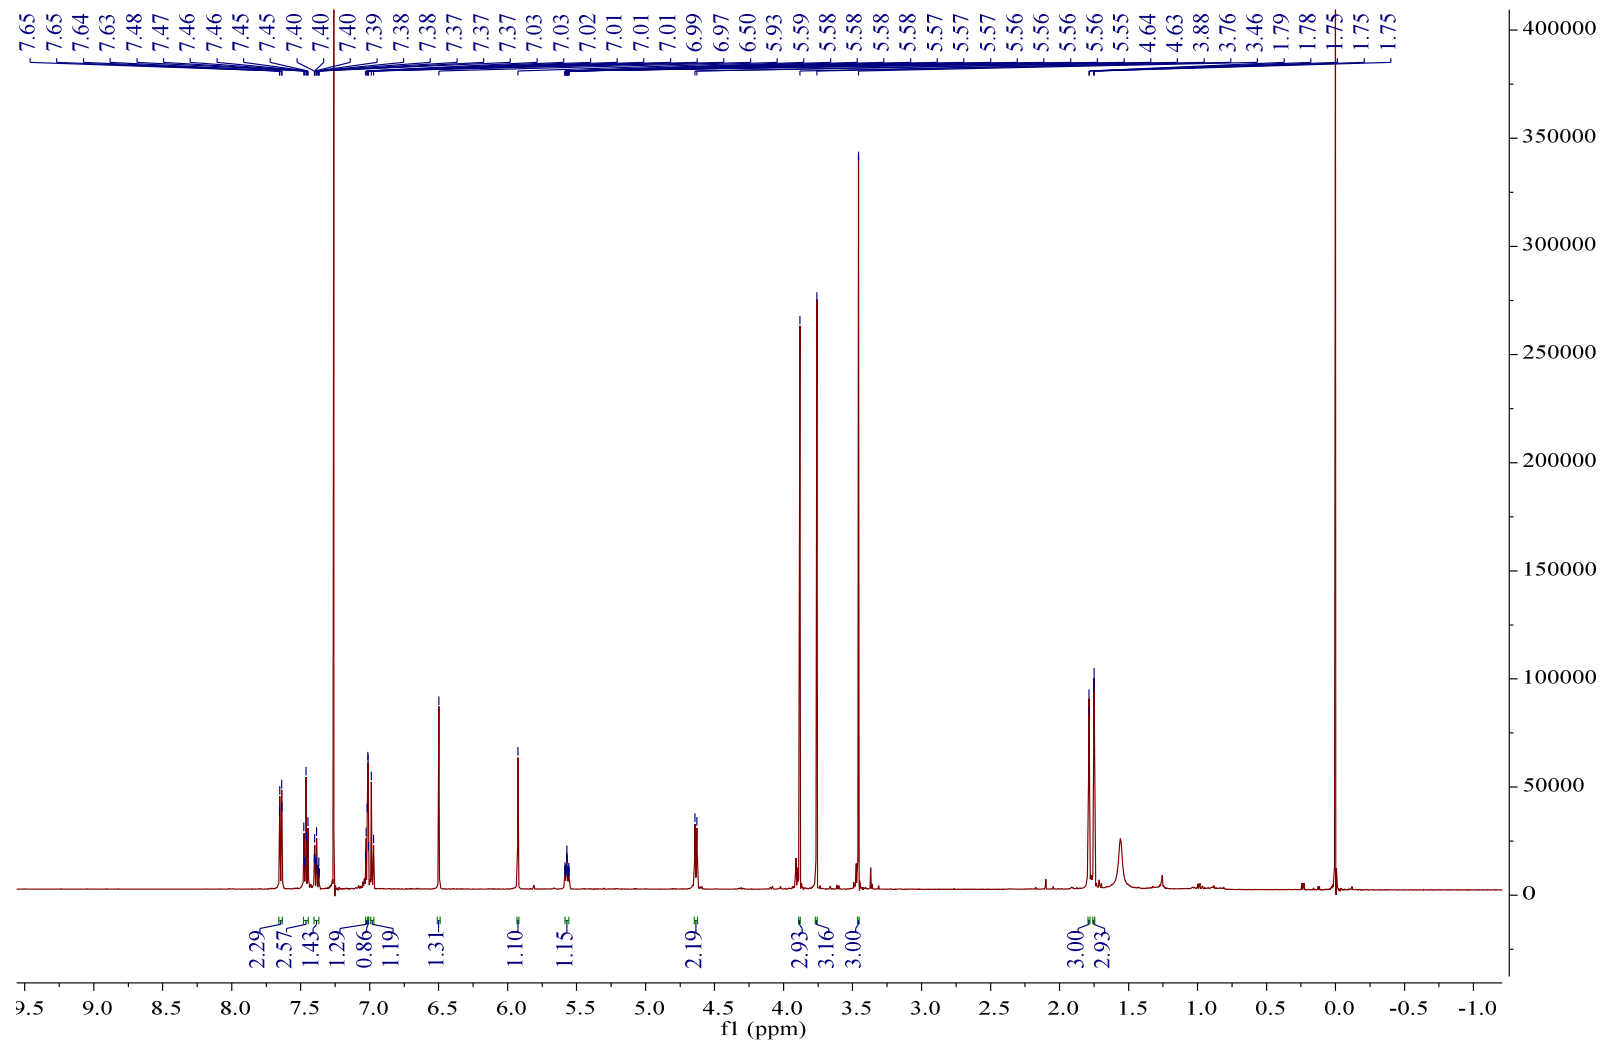

Figure S25. <sup>1</sup>H-NMR spectrum of **3** in CDCl<sub>3</sub> at 500 MHz

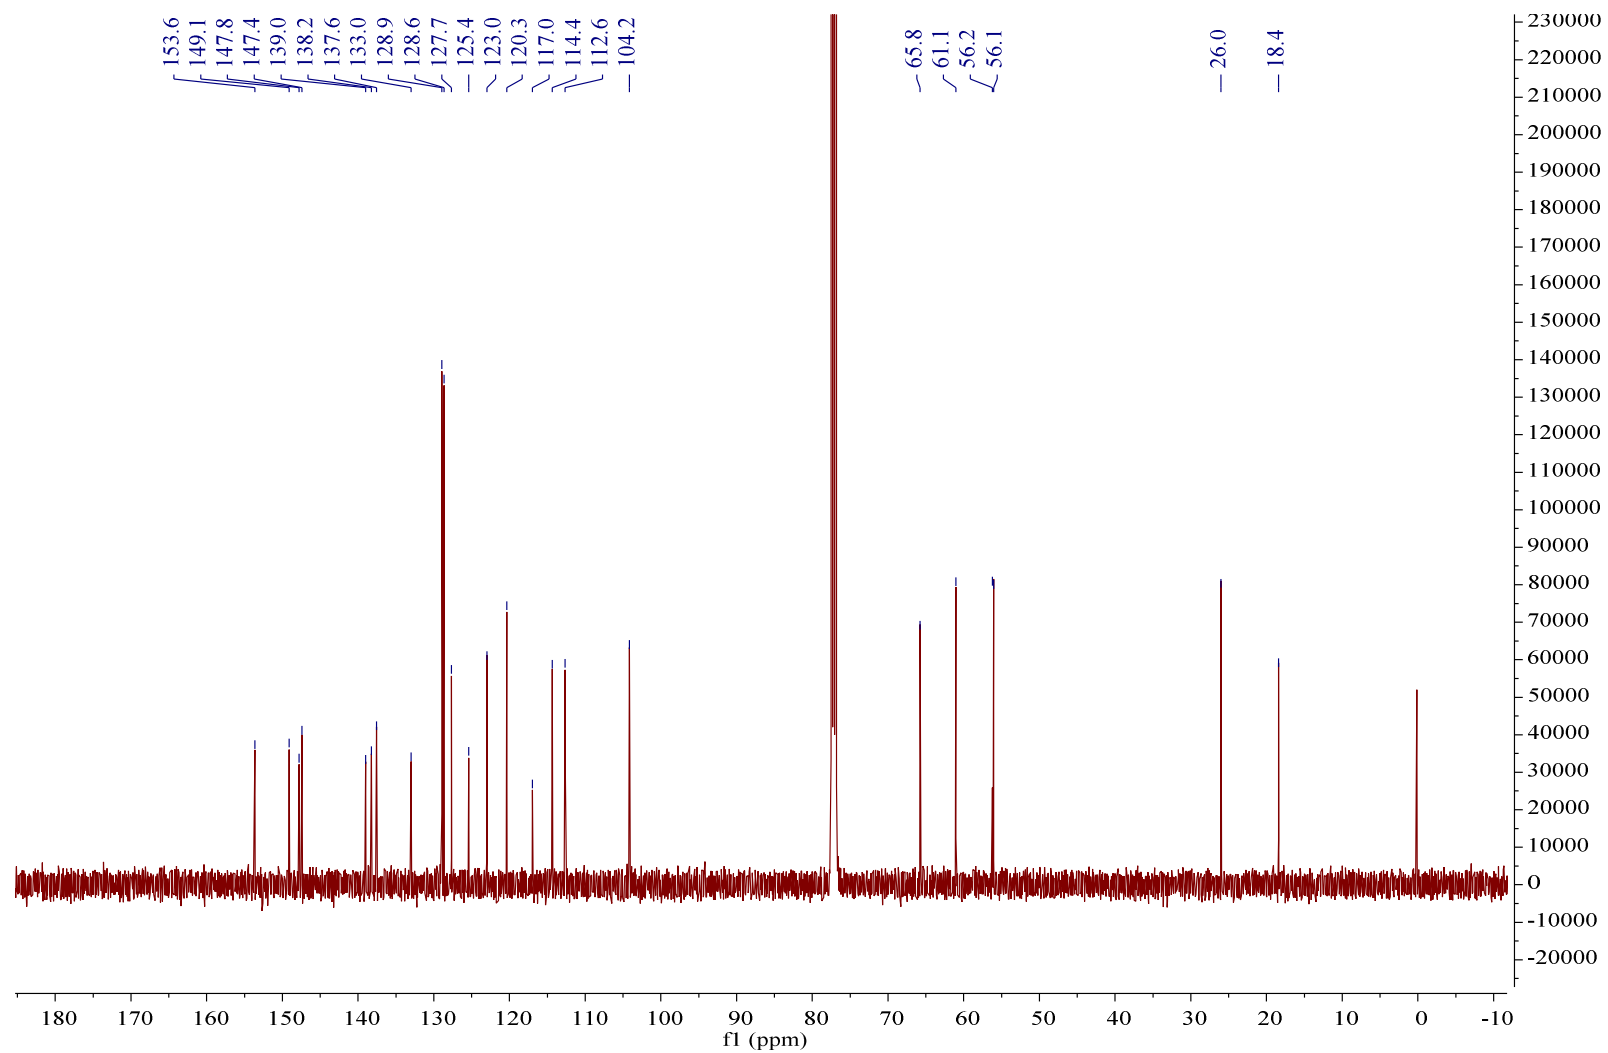

Figure S26. <sup>13</sup>C-NMR spectrum of **3** in CDCl<sub>3</sub> at 125 MHz

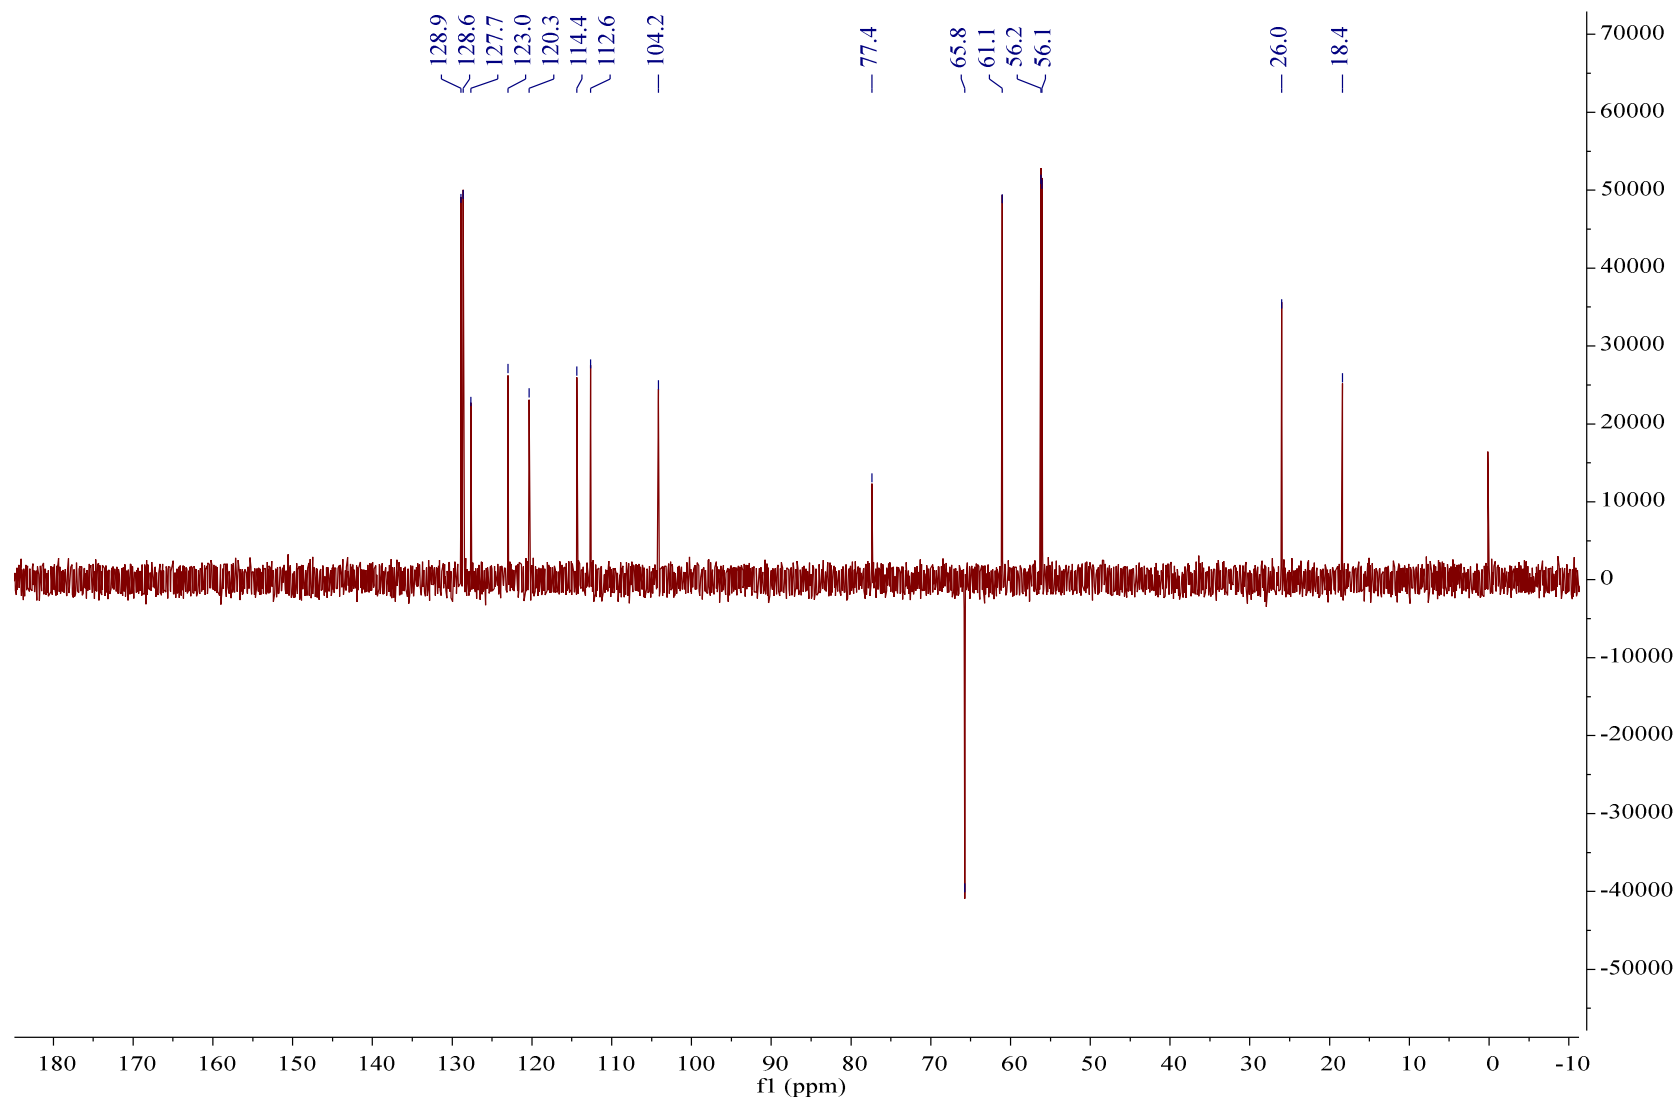

Figure S27. DEPT spectrum of **3** in CDCl<sub>3</sub> at 125 MHz

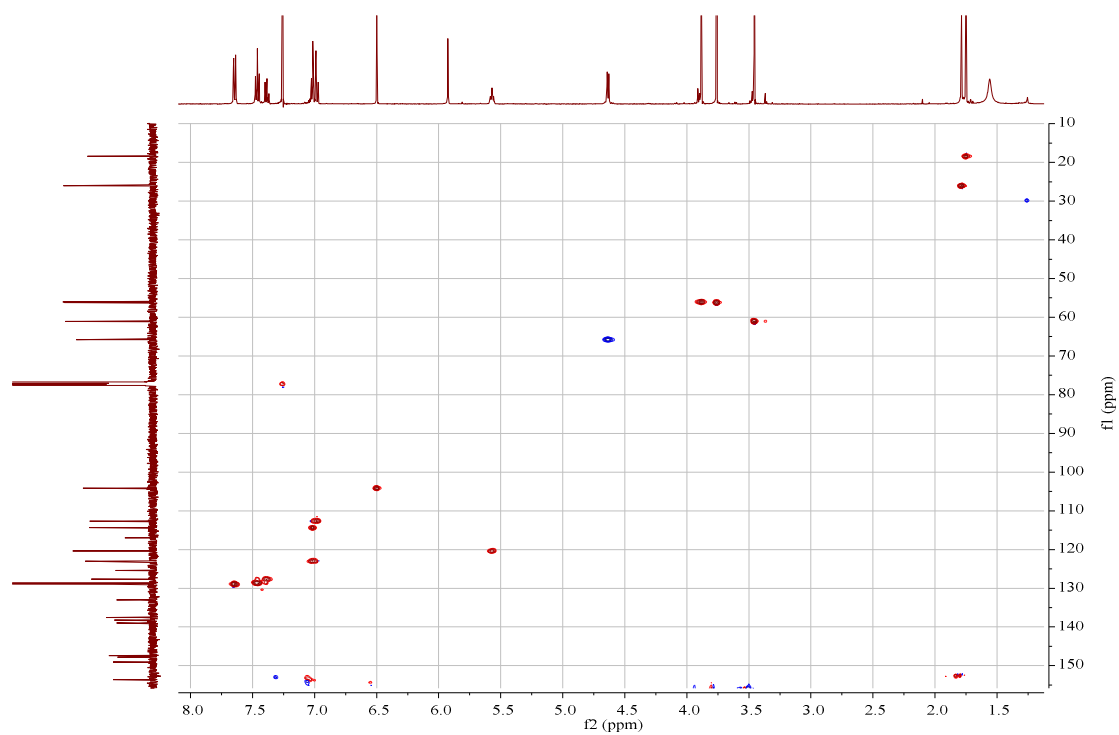

Figure S28. HSQC spectrum of **3** in  $\text{CDCl}_3$

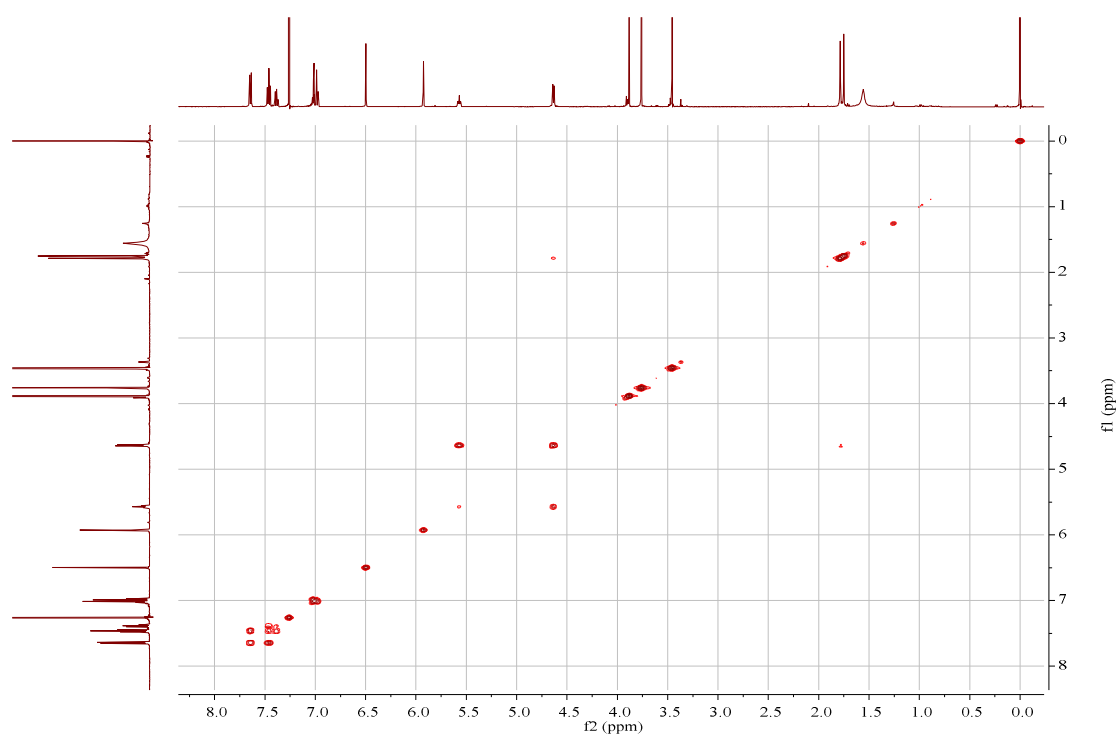

Figure S29. COSY spectrum of **3** in  $\text{CDCl}_3$

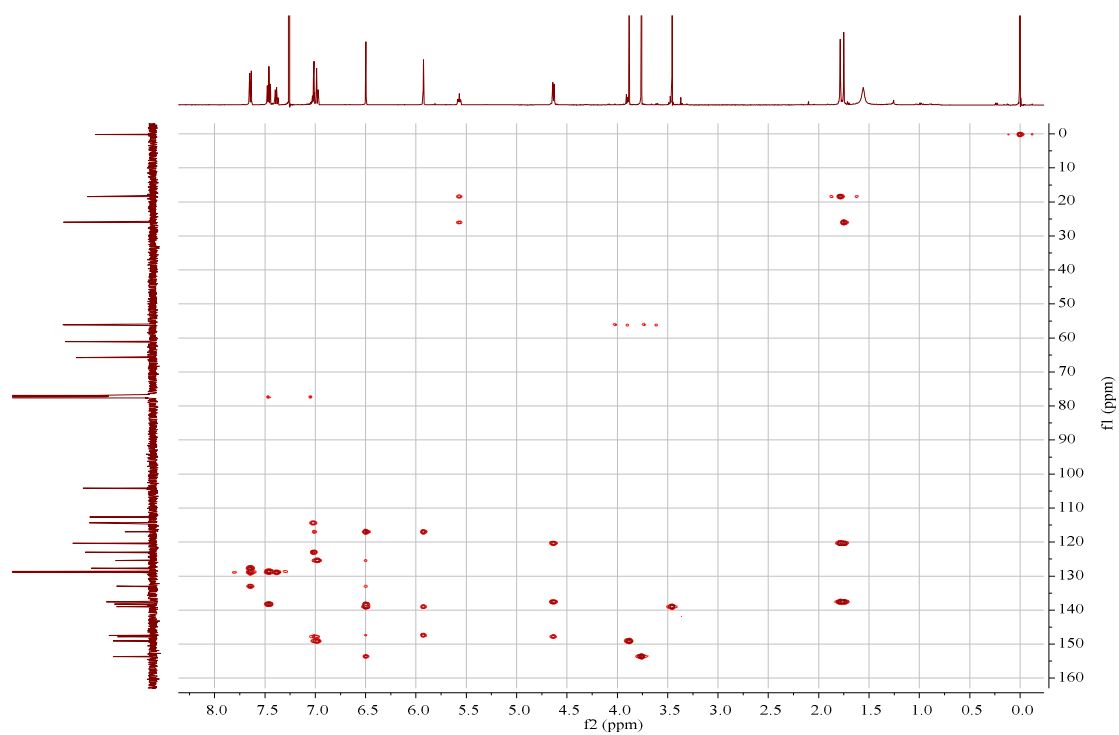

Figure S30. HMBC spectrum of **3** in CDCl<sub>3</sub>

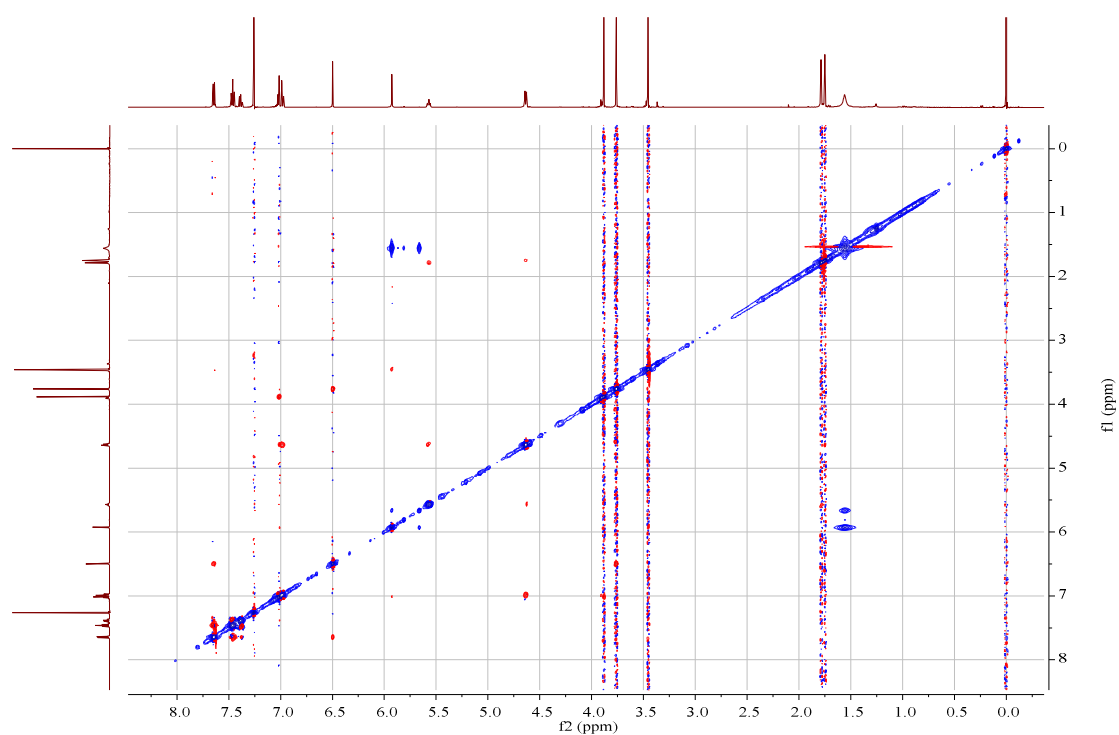

Figure S31. NOESY spectrum of **3** in CDCl<sub>3</sub>

## User Spectra

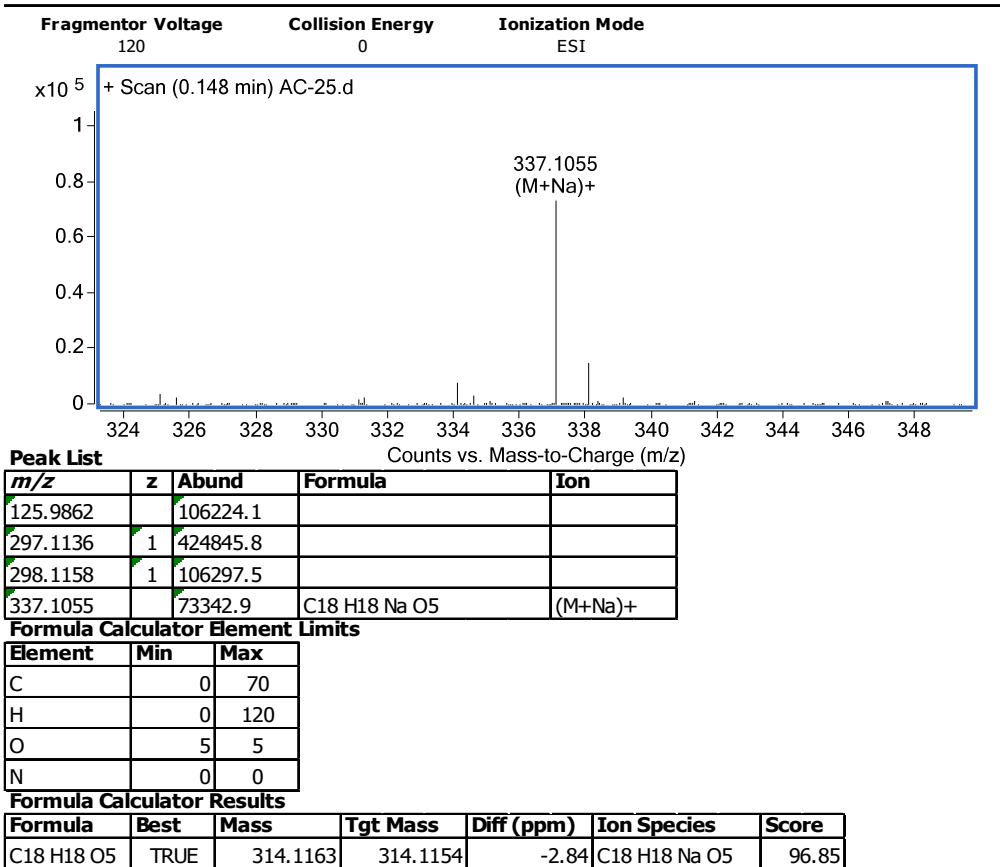

Figure S32. MS of 17

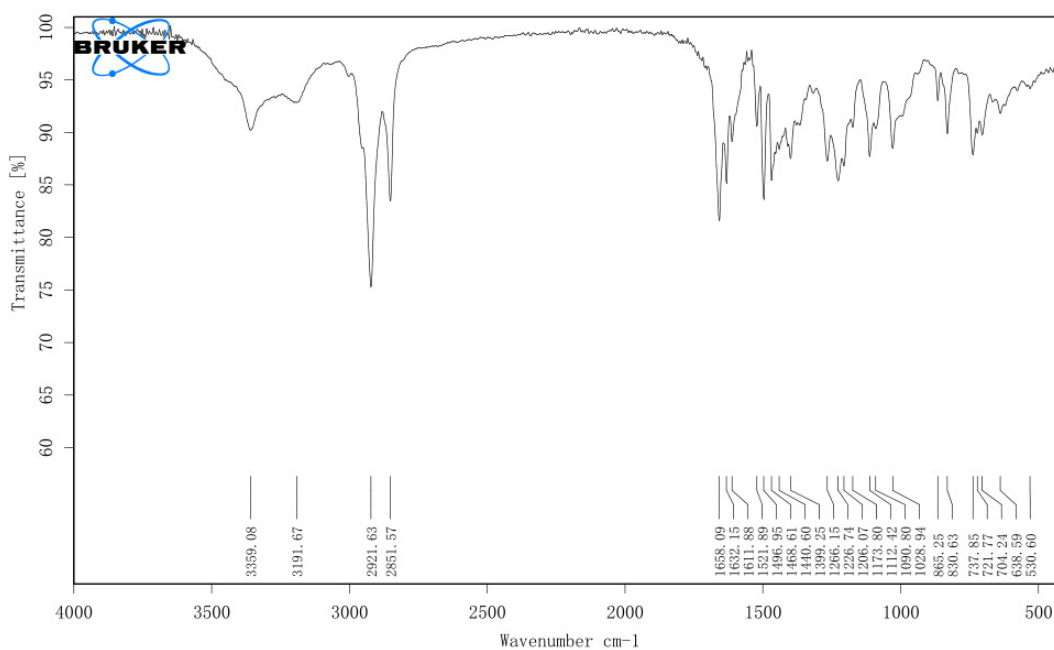

Figure S33. IR (film) of 17

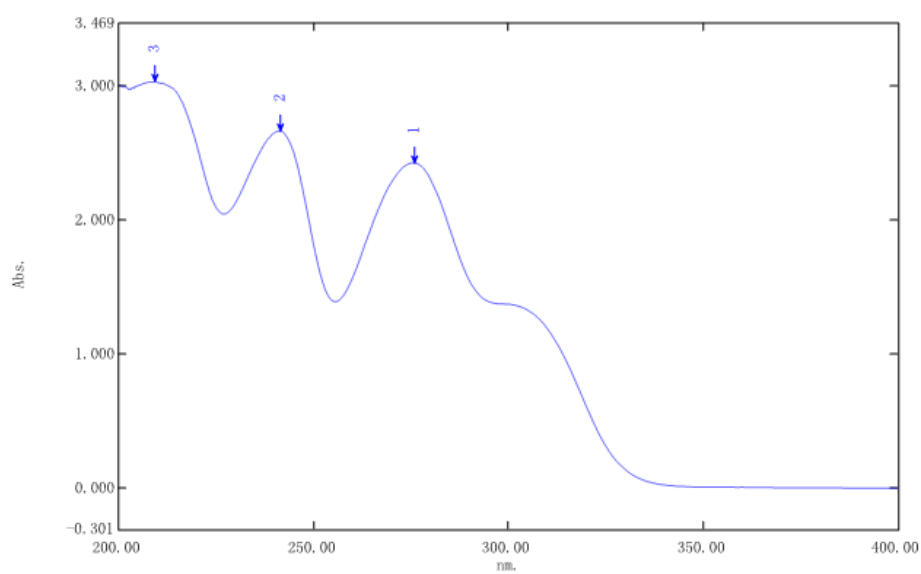

< 峰值检测表 >

| No. | P/V                                                                                 | 波长 (nm) | Abs.  | 描述 |
|-----|-------------------------------------------------------------------------------------|---------|-------|----|
| 1   |    | 276.00  | 2.429 |    |
| 2   |    | 241.60  | 2.666 |    |
| 3   |    | 209.20  | 3.035 |    |
| 4   |    | 255.60  | 1.393 |    |
| 5   |   | 227.20  | 2.048 |    |
| 6   |  | 202.80  | 2.975 |    |

Figure S34. UV of **17** in MeCN



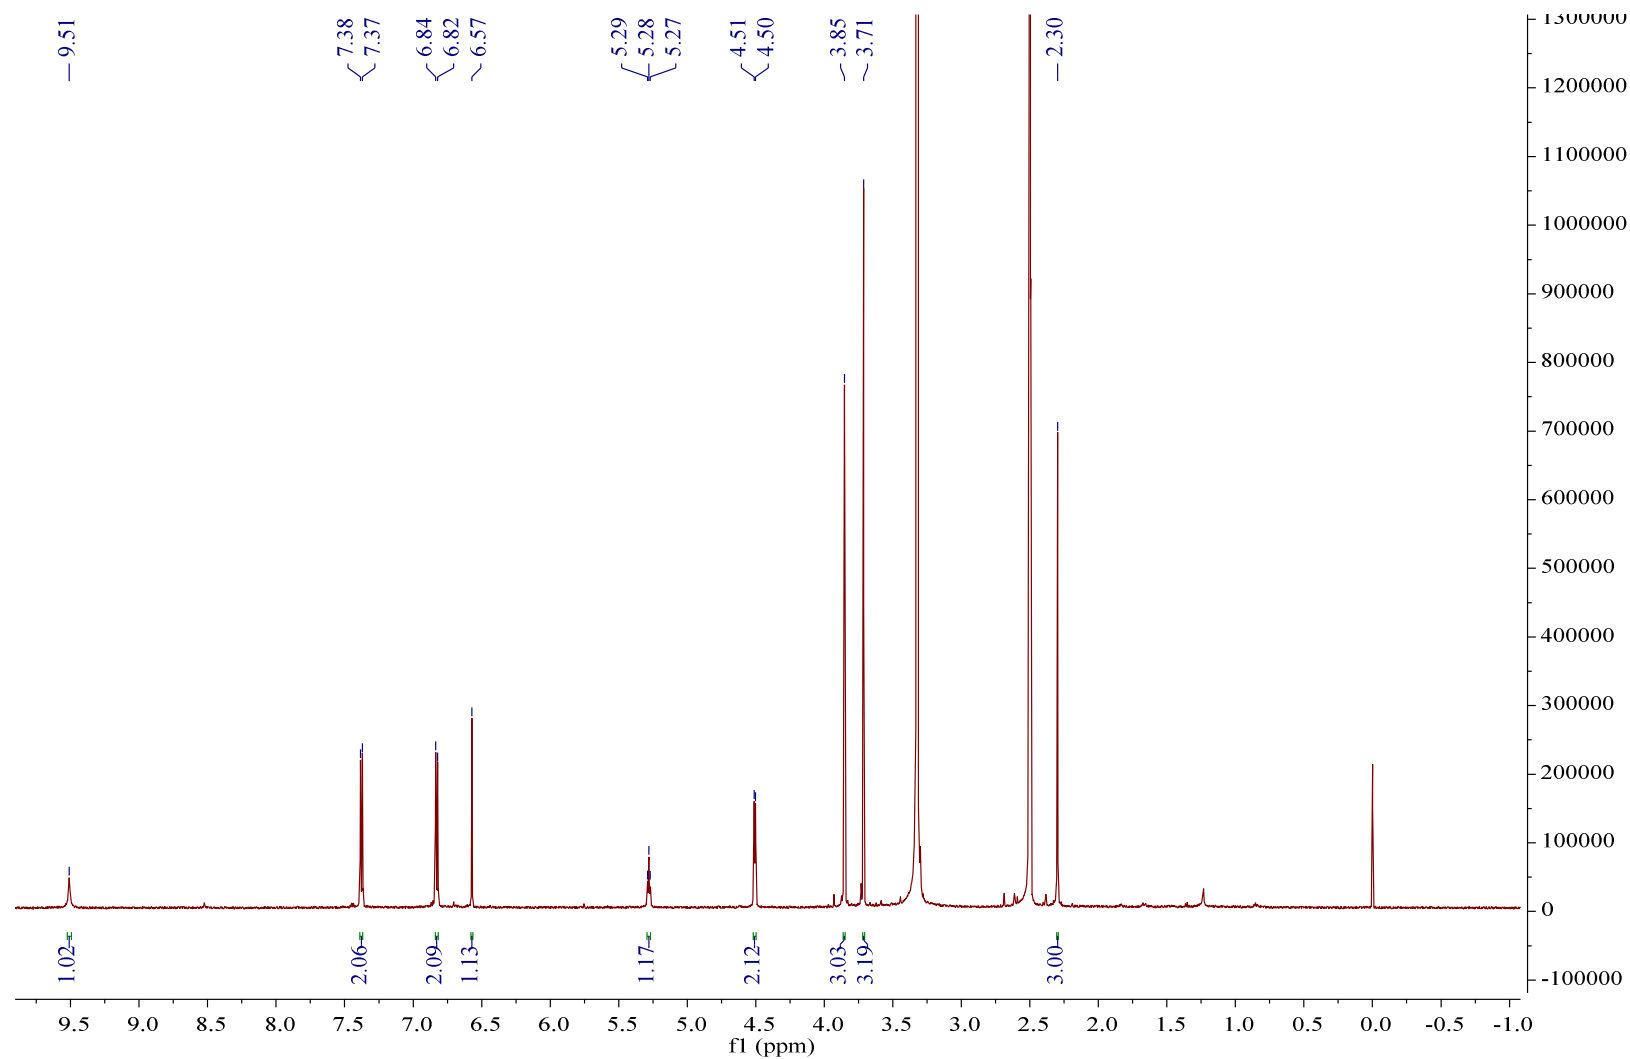

Figure S35. <sup>1</sup>H-NMR spectrum of **17** in DMSO at 600 MHz

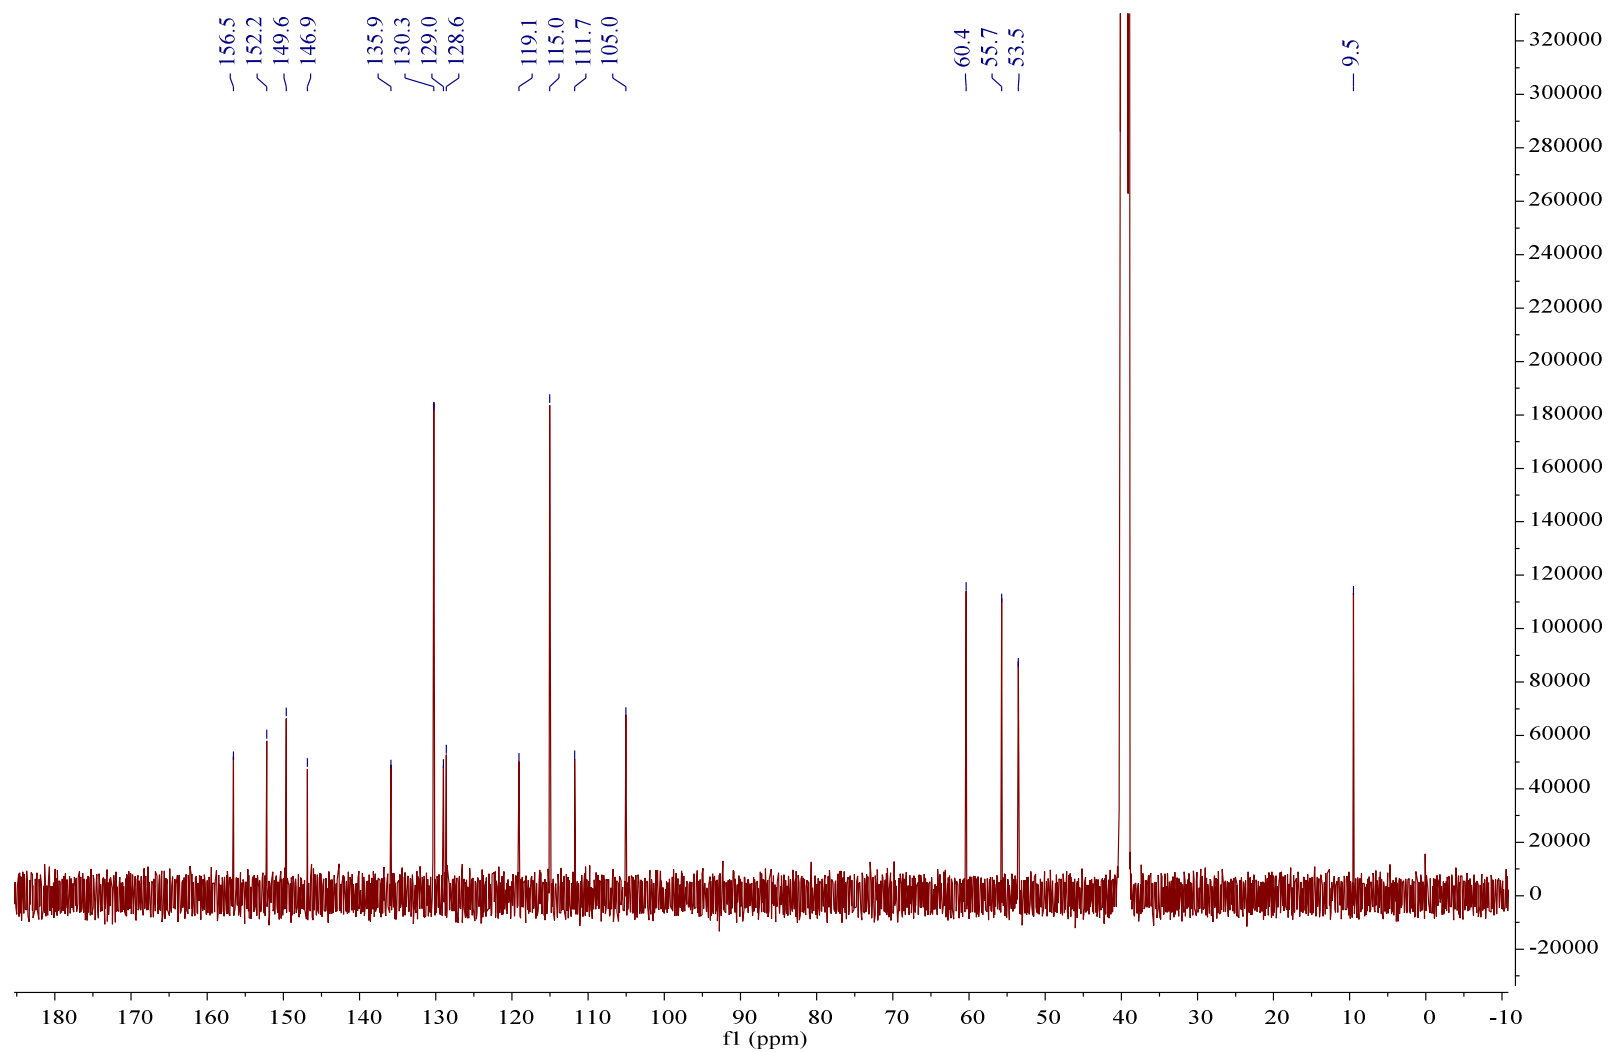

Figure S36. <sup>13</sup>C-NMR spectrum of **17** in DMSO at 125 MHz

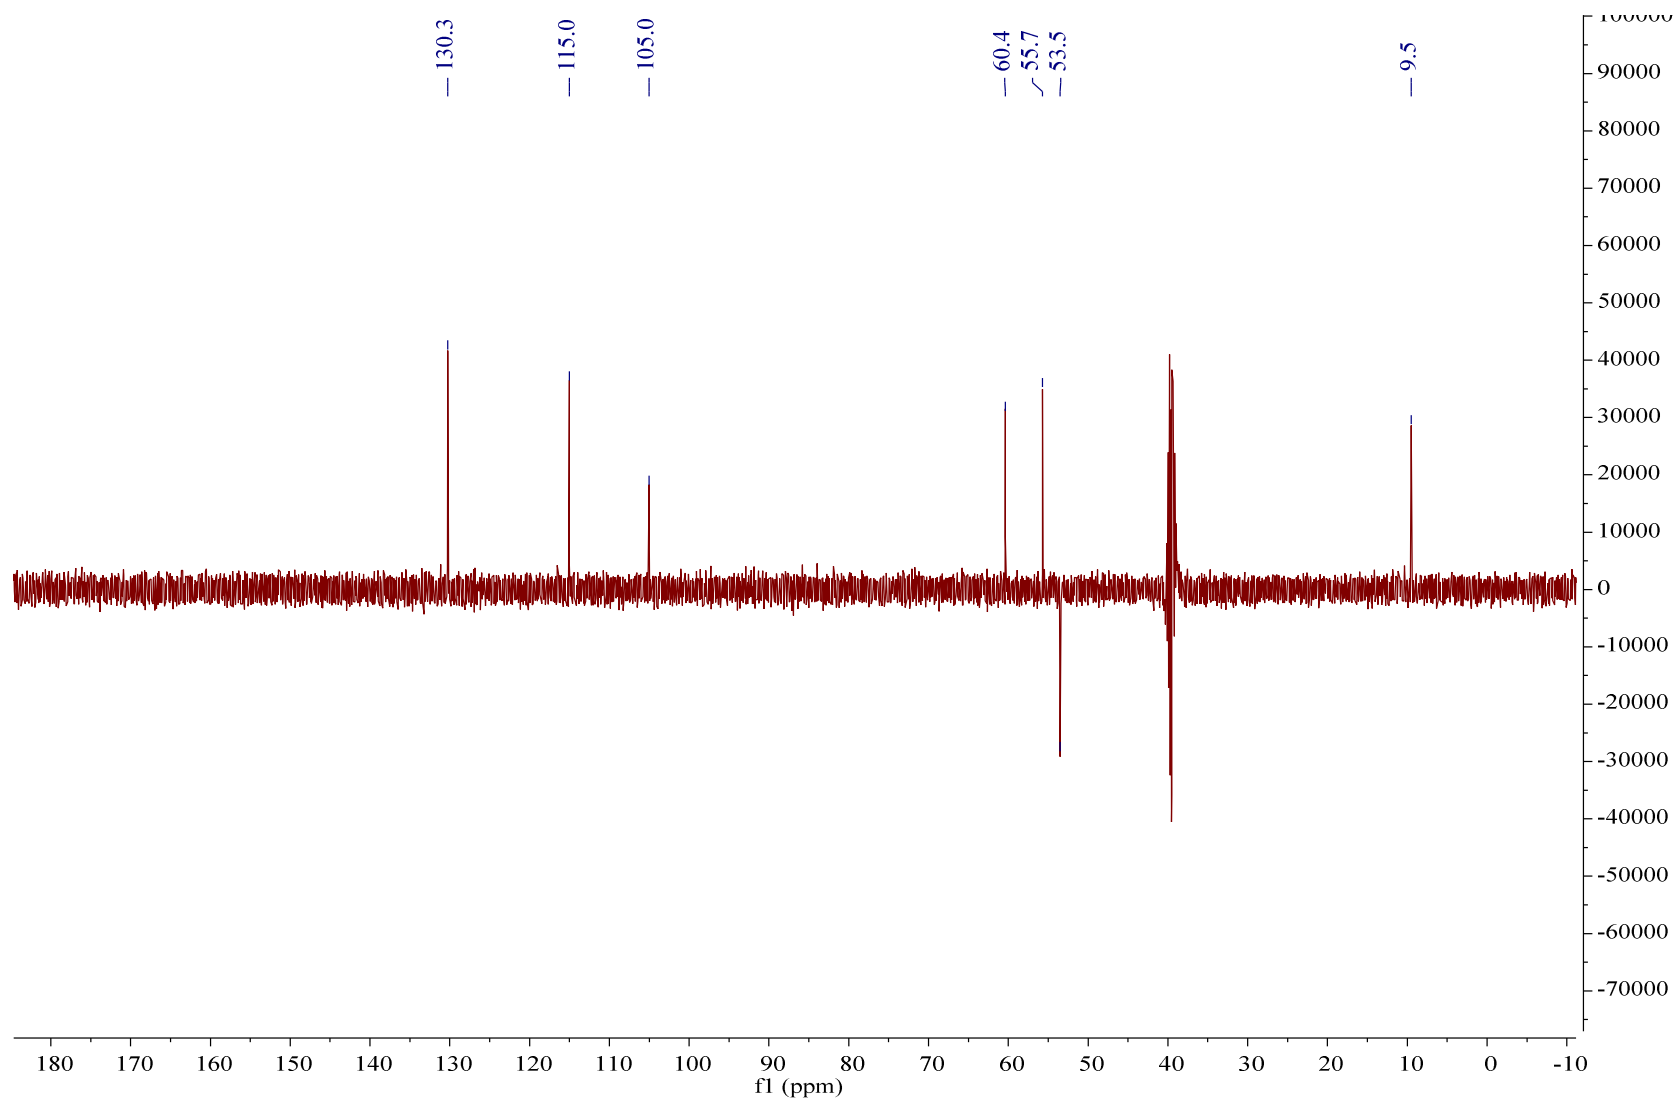

Figure S37. DEPT spectrum of **17** in DMSO at 125 MHz

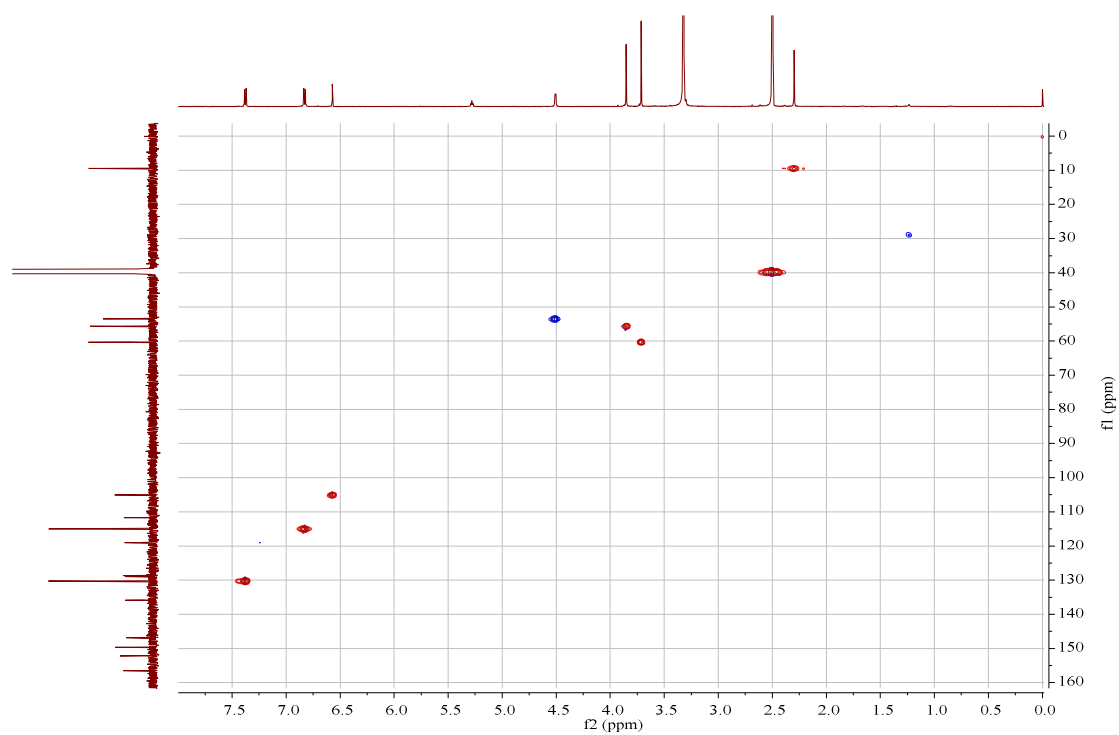

Figure S38. HSQC spectrum of **17** in DMSO

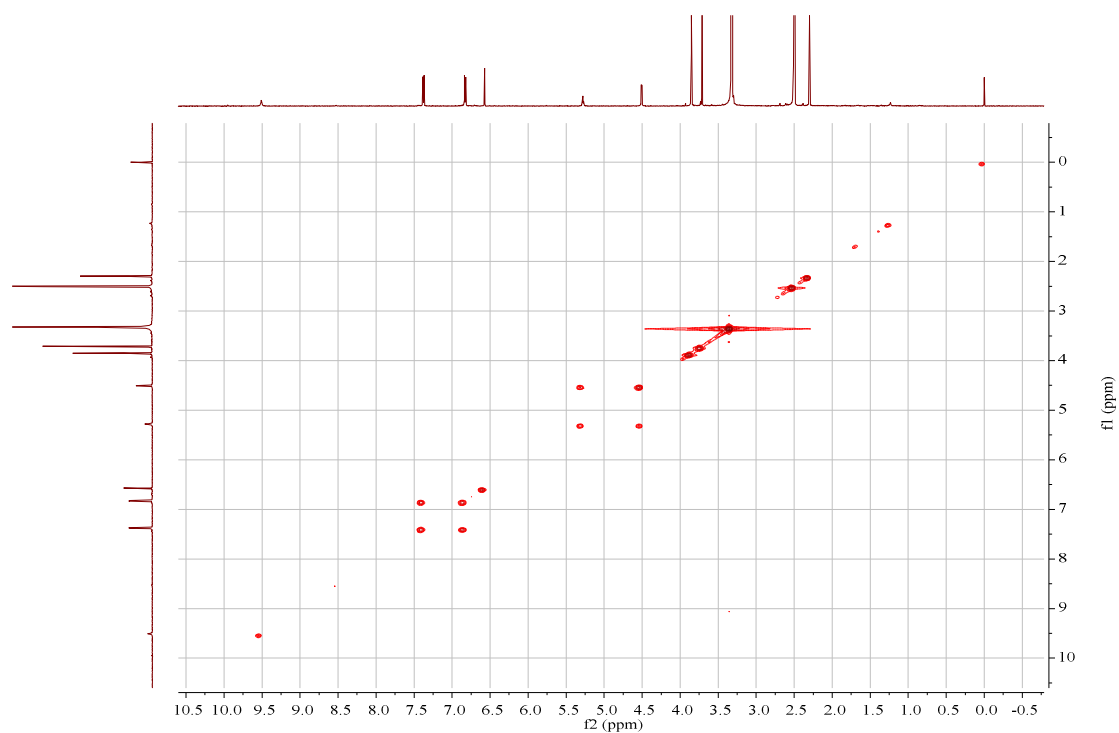

Figure S39. COSY spectrum of **17** in DMSO

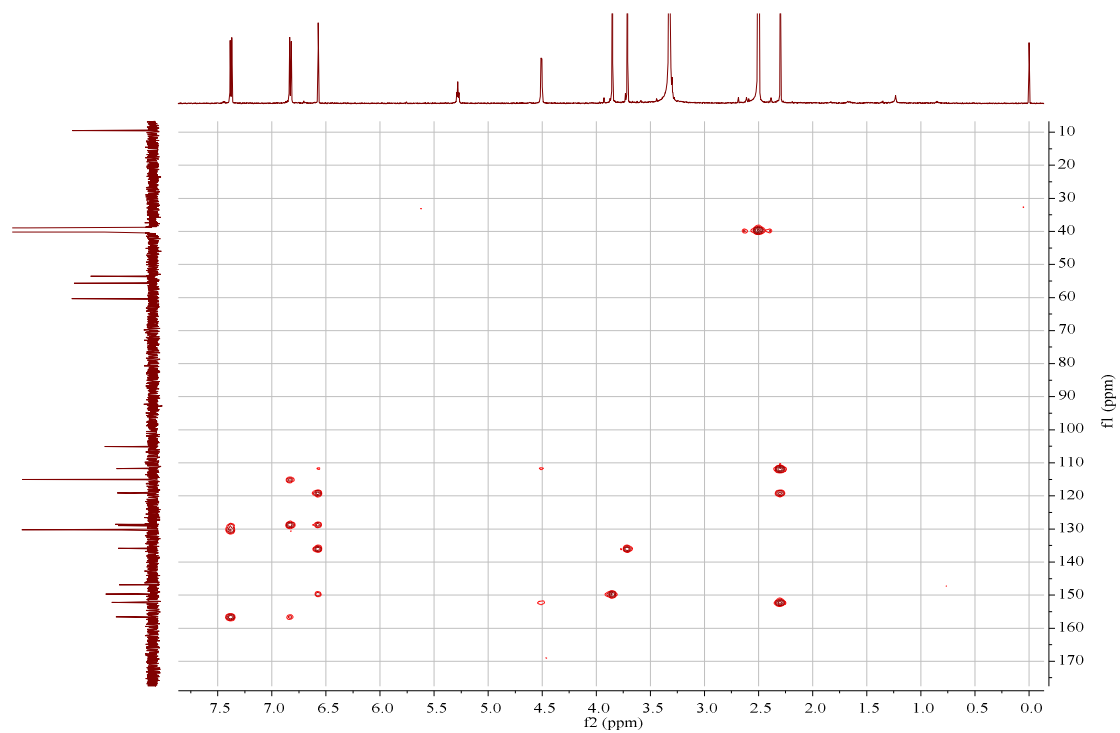

Figure S40. HMBC spectrum of **17** in DMSO

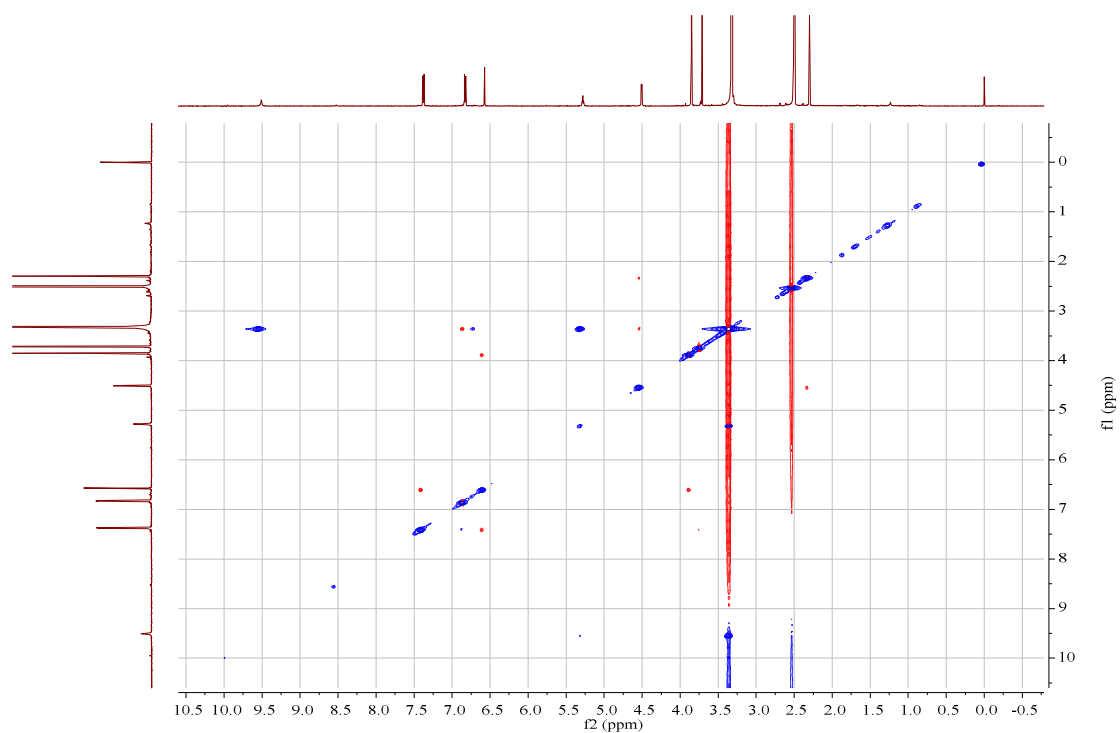

Figure S41. NOESY spectrum of **17** in DMSO

## User Spectra

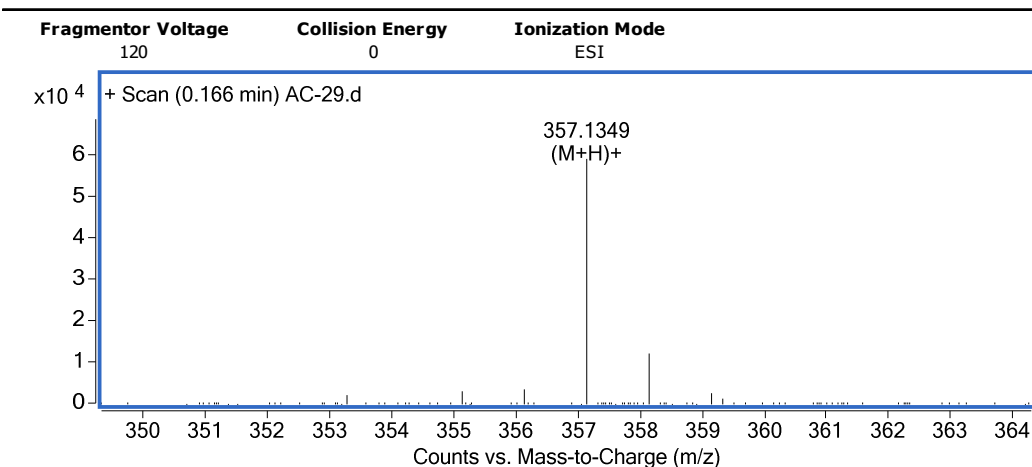

### Peak List

| m/z      | Abund   | Formula    | Ion    |
|----------|---------|------------|--------|
| 125.9866 | 44687.1 |            |        |
| 357.1349 | 59318   | C20 H21 O6 | (M+H)+ |
| 374.1614 | 53866.2 |            |        |
| 379.117  | 46411.6 |            |        |

### Formula Calculator Element Limits

| Element | Min | Max |
|---------|-----|-----|
| C       | 0   | 70  |
| H       | 0   | 120 |
| O       | 6   | 6   |
| N       | 0   | 0   |

### Formula Calculator Results

| Formula    | Best | Mass     | Tgt Mass | Diff (ppm) | Ion Species | Score |
|------------|------|----------|----------|------------|-------------|-------|
| C20 H20 O6 | TRUE | 356.1276 | 356.126  | -4.61      | C20 H21 O6  | 91.08 |

Figure S42. MS of **18**

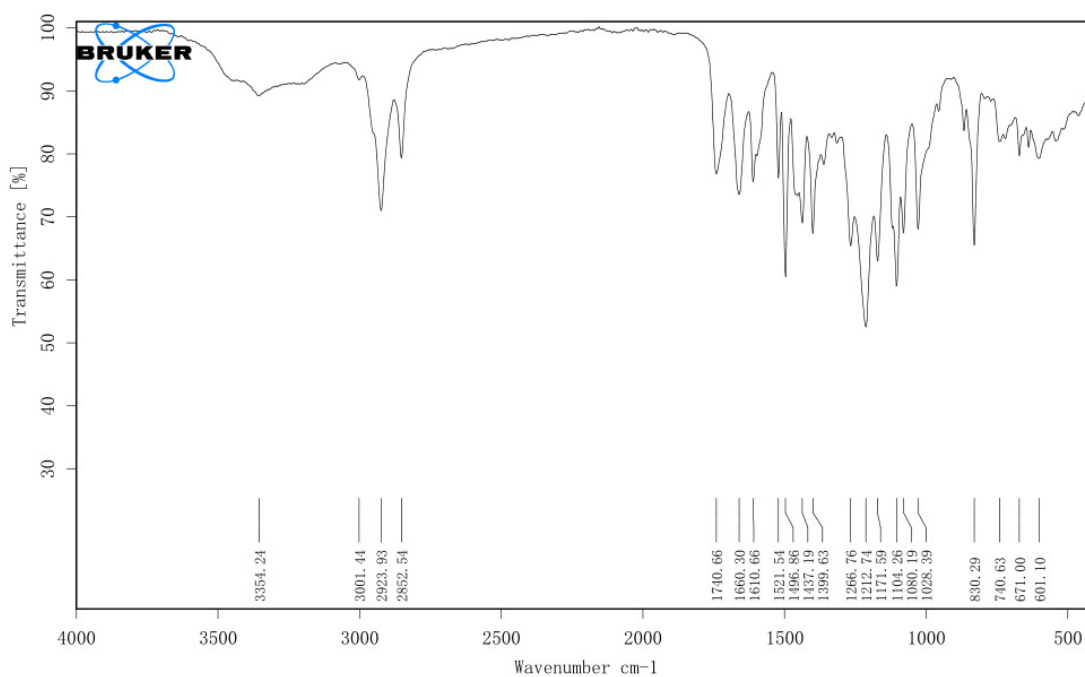

Figure S43. IR (film) of **18**

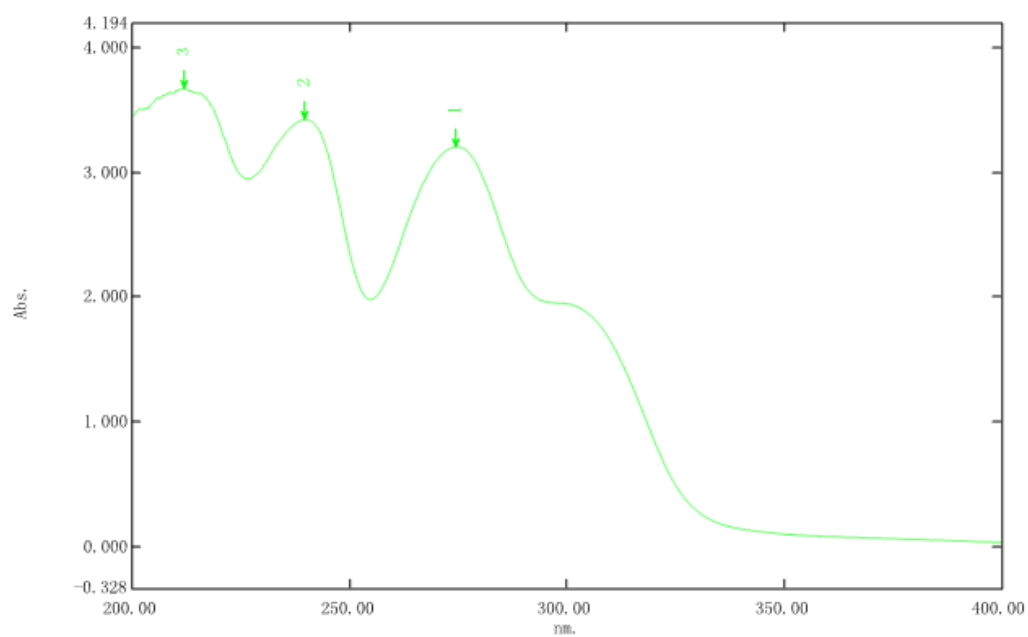

< 峰值检测表 >

| No. | P/V | 波长(nm) | Abs.  | 描述 |
|-----|-----|--------|-------|----|
| 1   |     | 274.60 | 3.209 |    |
| 2   |     | 239.60 | 3.425 |    |
| 3   |     | 211.80 | 3.674 |    |
| 4   |     | 254.80 | 1.982 |    |
| 5   |     | 226.60 | 2.946 |    |

Figure S44. UV of **18** in MeCN

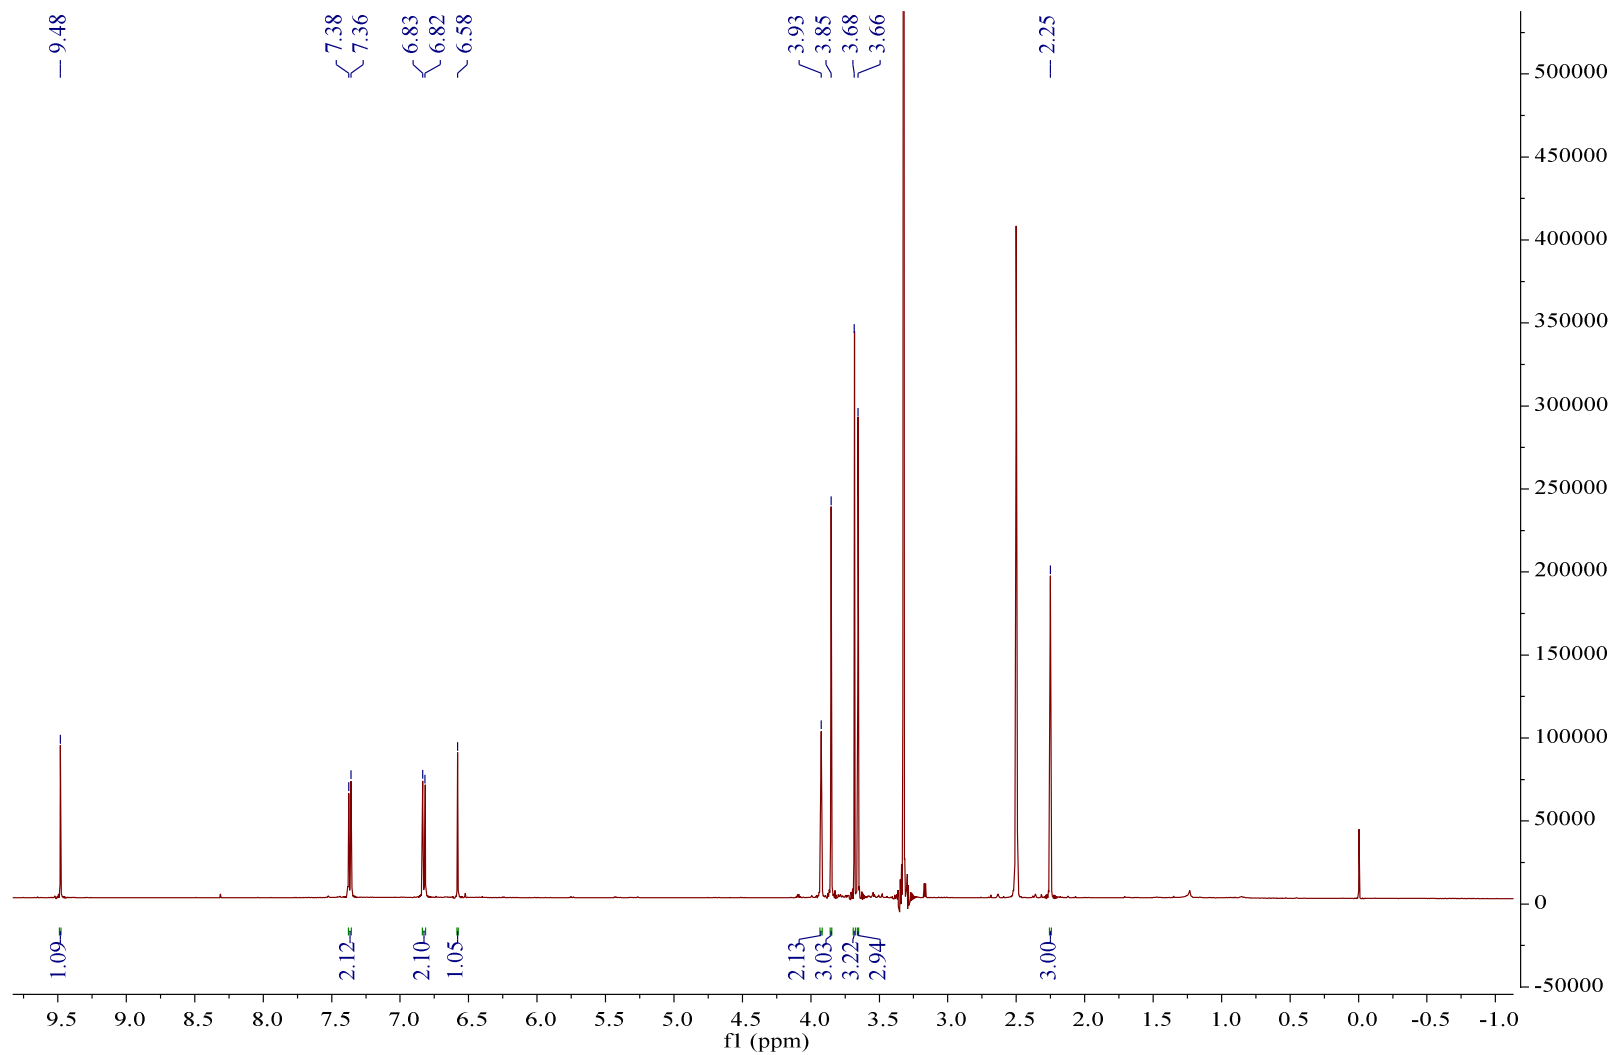

Figure S45. <sup>1</sup>H-NMR spectrum of **18** in DMSO at 500 MHz



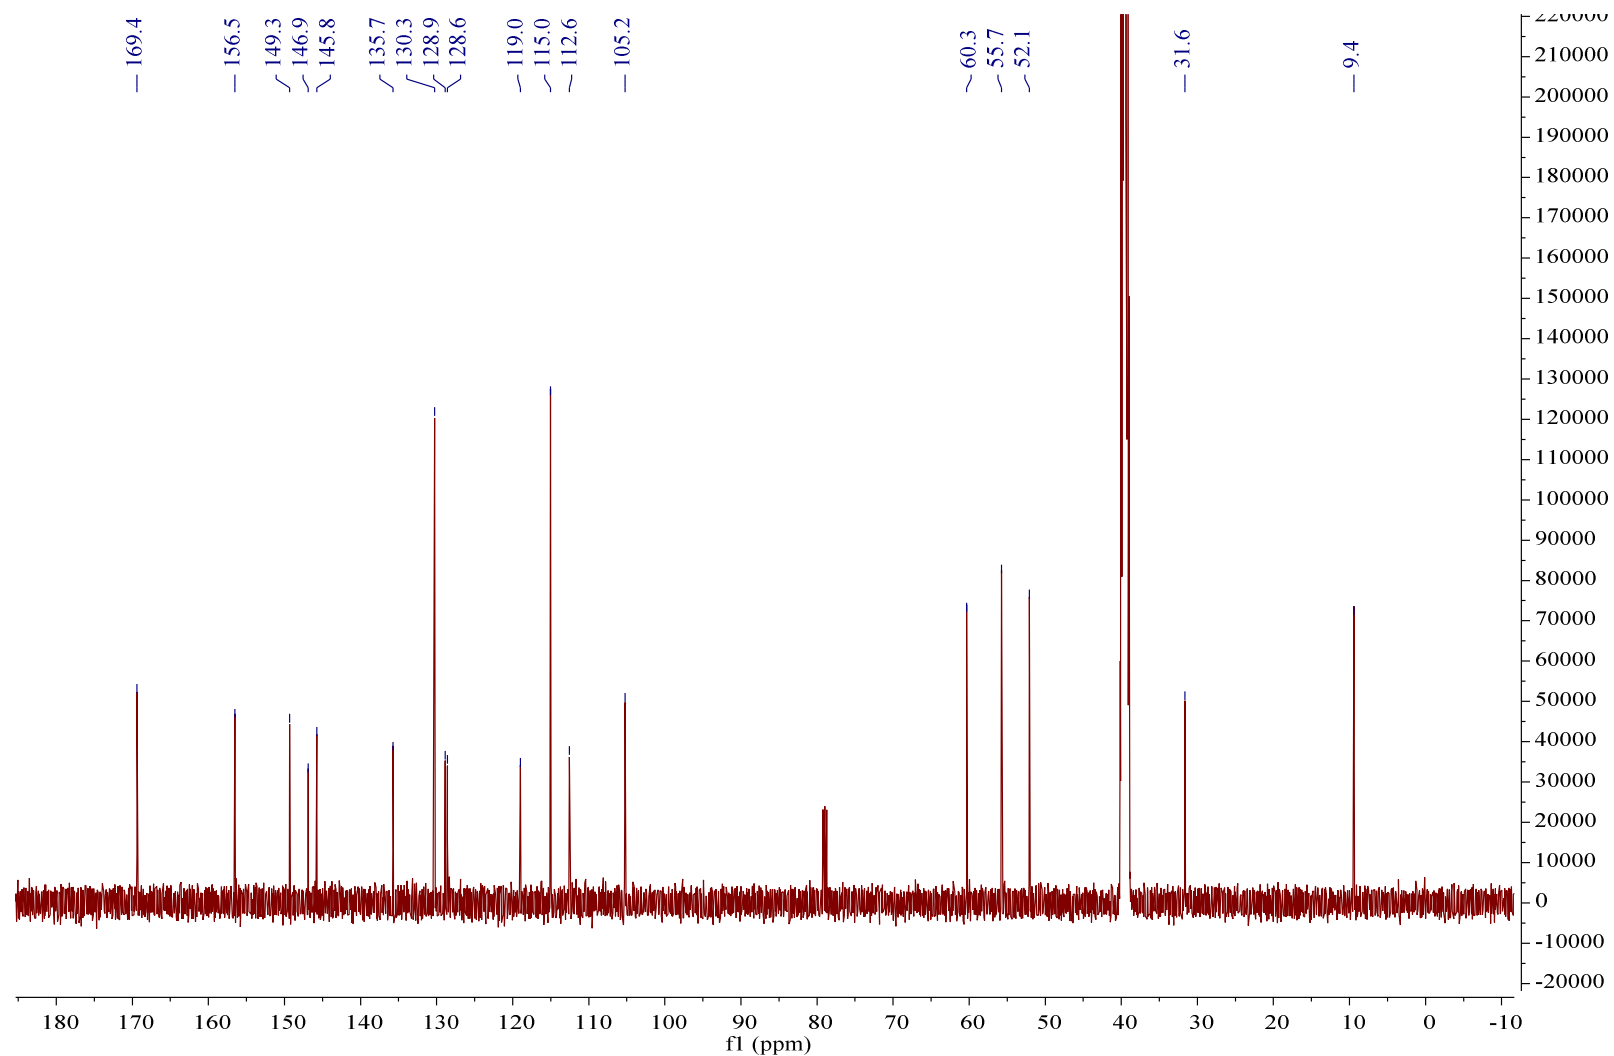

Figure S46.  $^{13}\text{C}$ -NMR spectrum of **18** in DMSO at 125 MHz

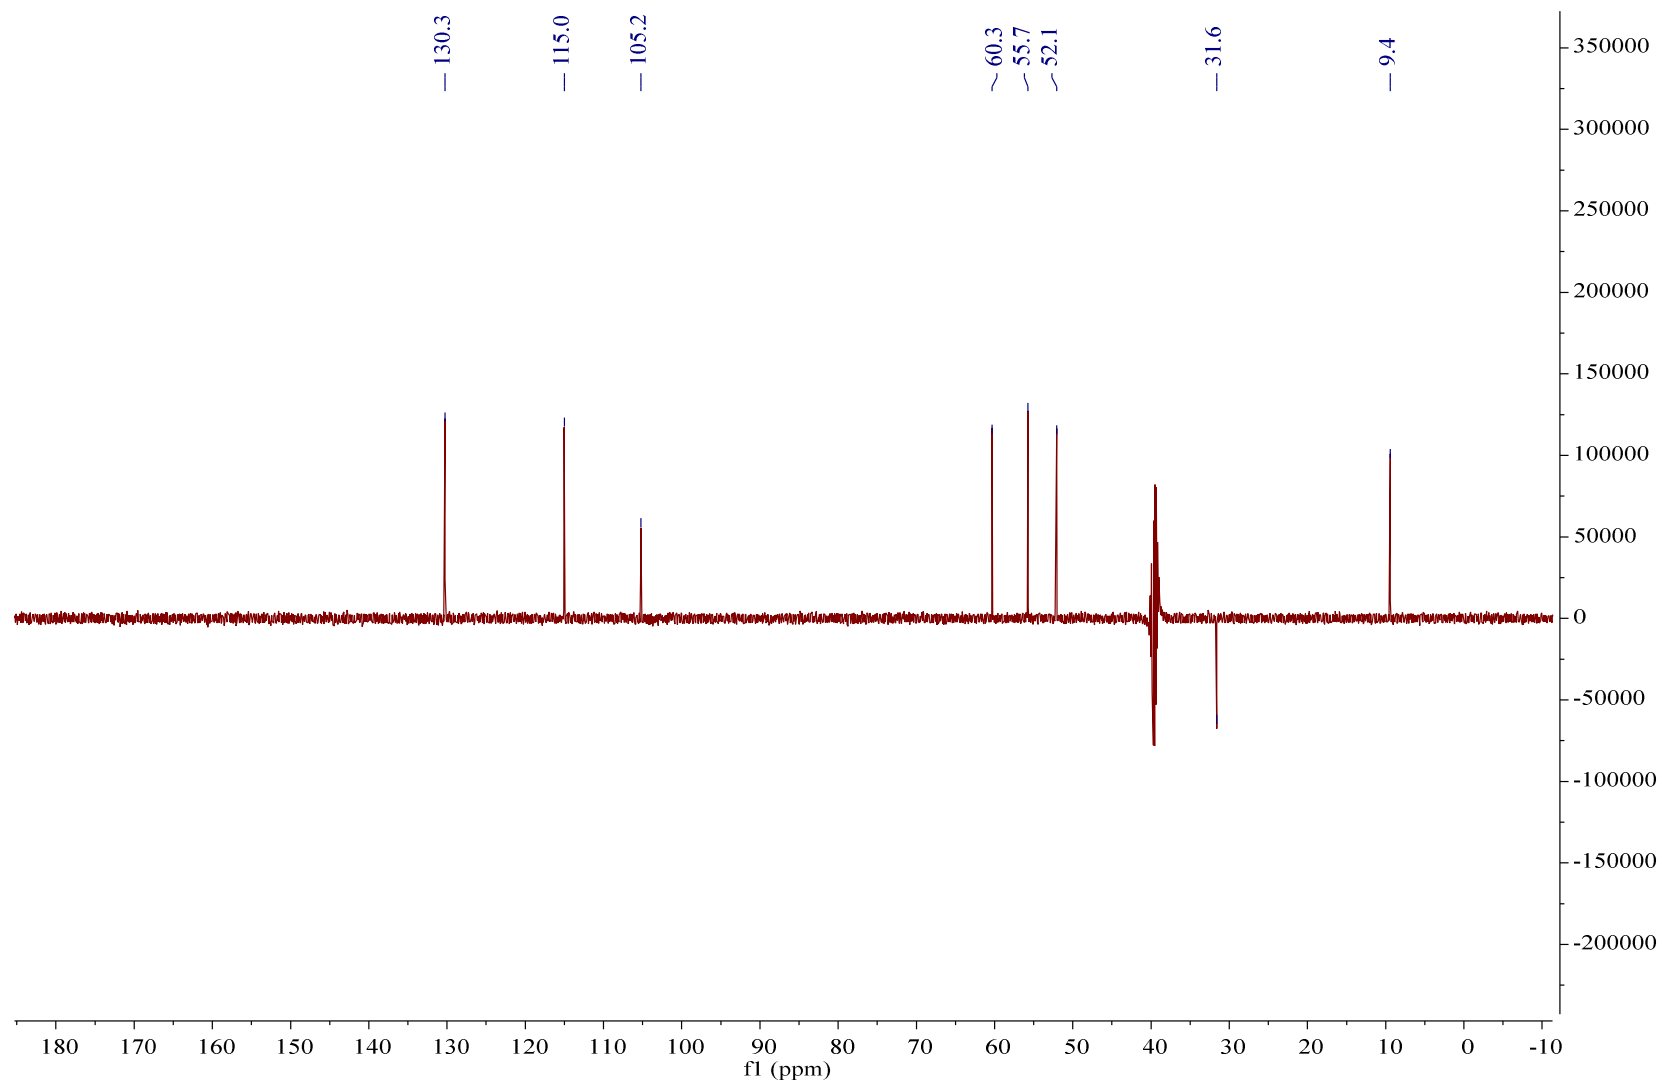

Figure S47. DEPT spectrum of **18** in DMSO at 125 MHz

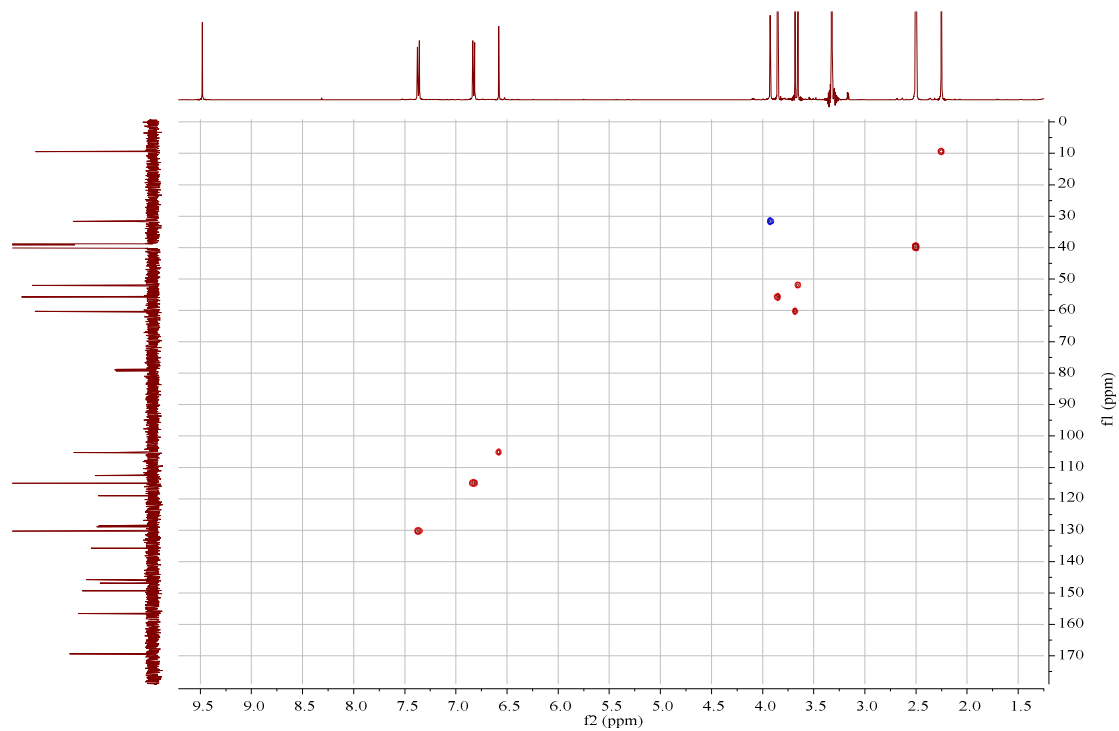

Figure S48. HSQC spectrum of **18** in DMSO

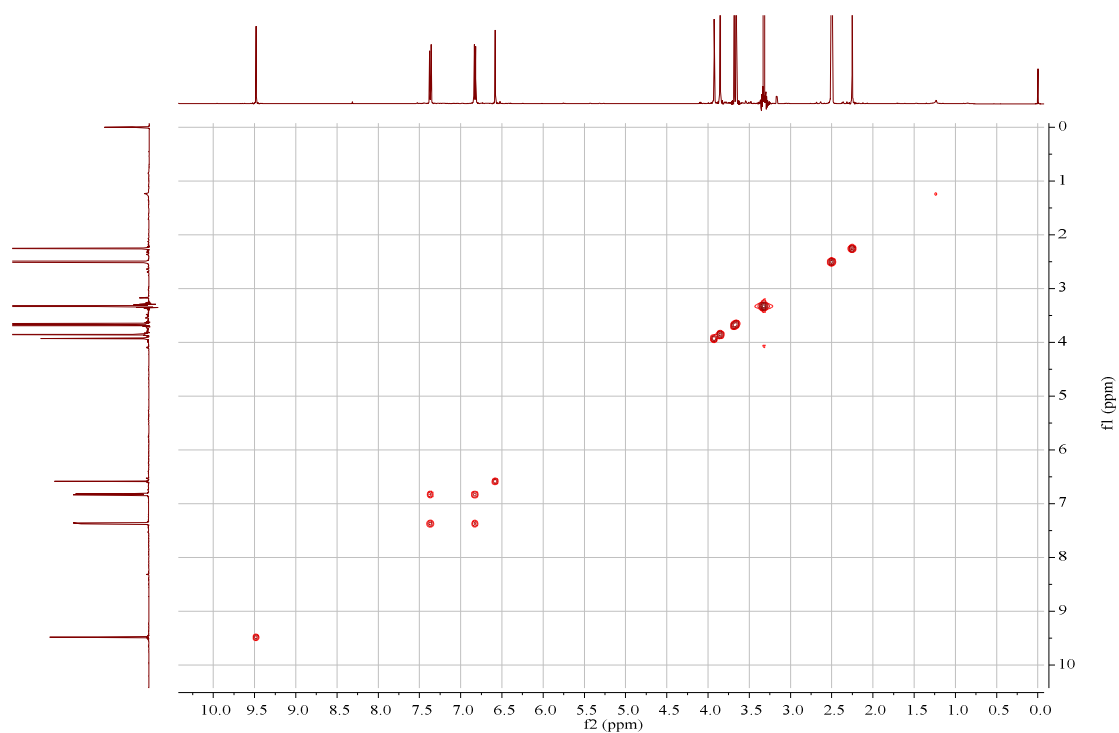

Figure S49. COSY spectrum of **18** in DMSO

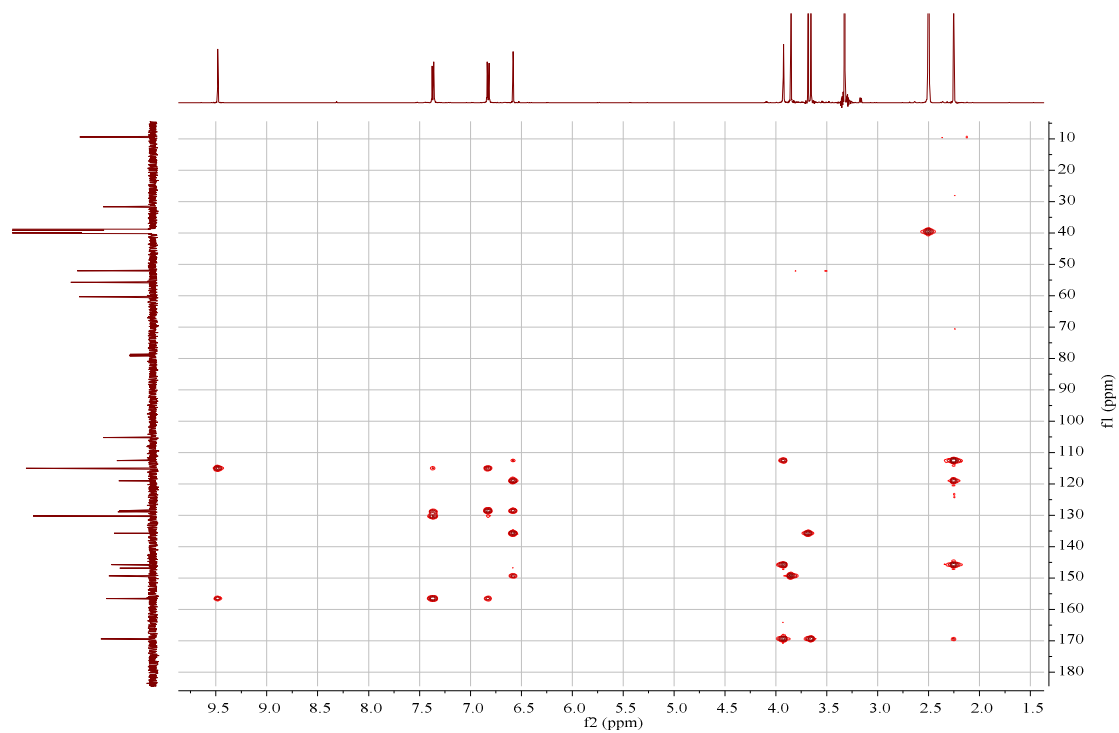

Figure S50. HMBC spectrum of **18** in DMSO

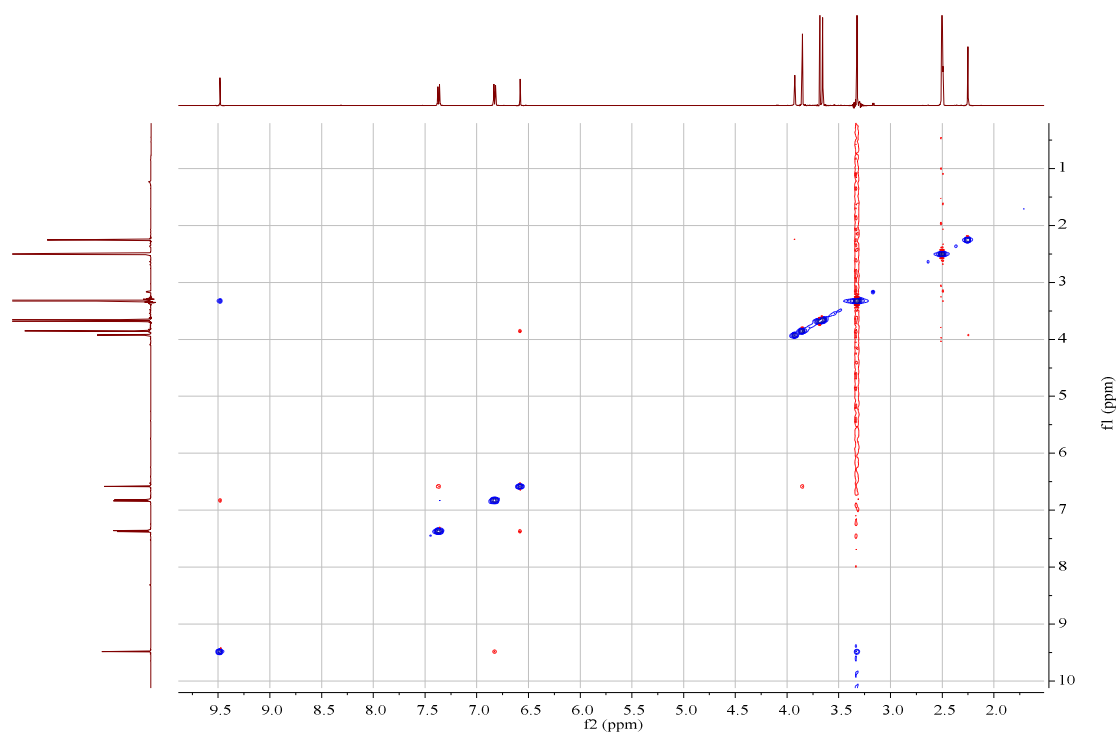

Figure S51. NOESY spectrum of **18** in DMSO

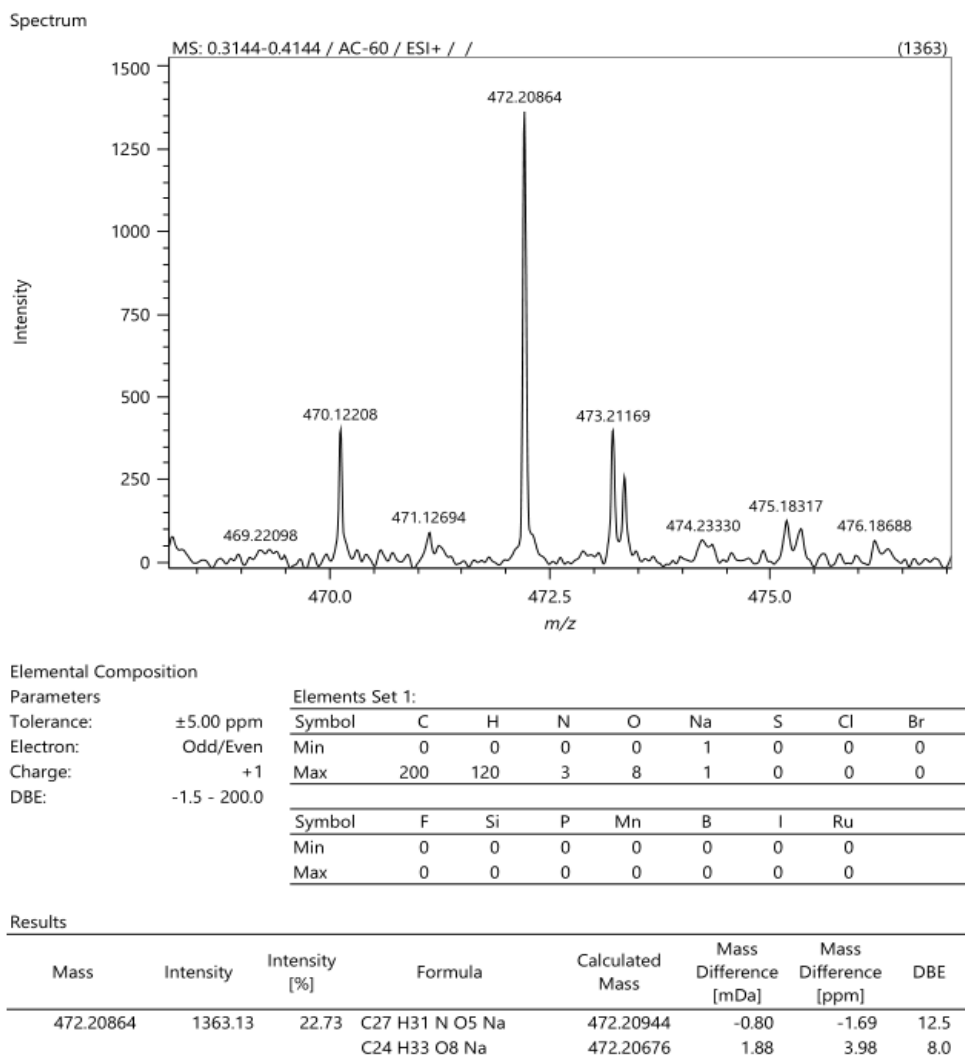

Figure S52. MS of **22**

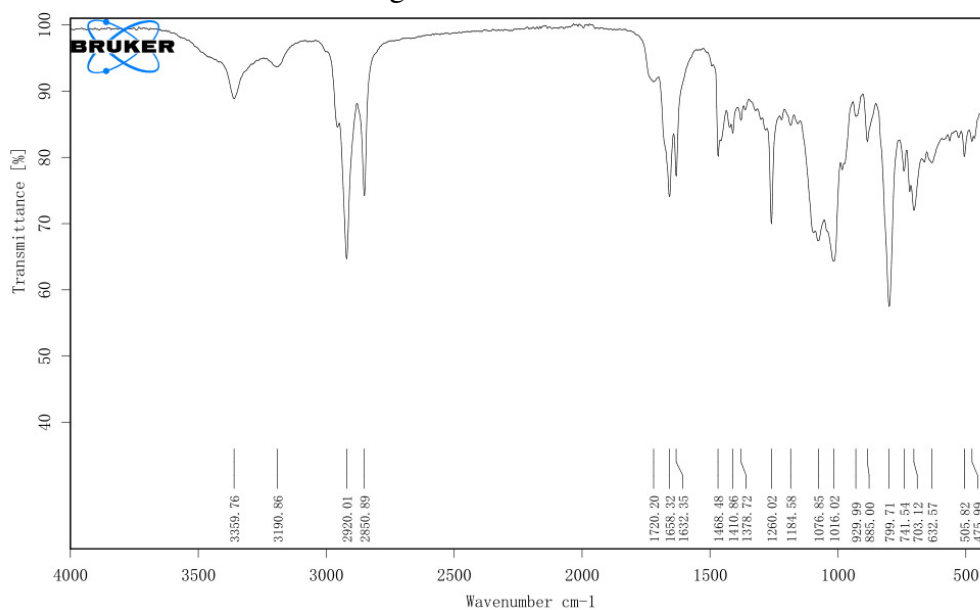

Figure S53. IR (film) of **22**

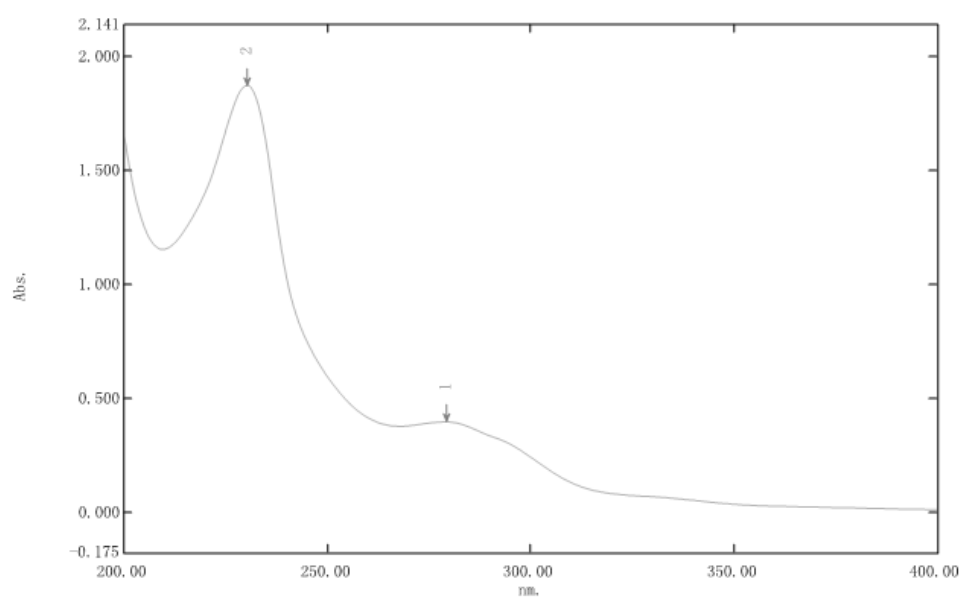

< 峰值检测表 >

| No. | P/V                                                                                | 波长 (nm) | Abs.  | 描述 |
|-----|------------------------------------------------------------------------------------|---------|-------|----|
| 1   |   | 279.40  | 0.397 |    |
| 2   |   | 230.40  | 1.875 |    |
| 3   |  | 268.20  | 0.377 |    |
| 4   |  | 209.60  | 1.154 |    |

Figure S54. UV of **22** in MeCN

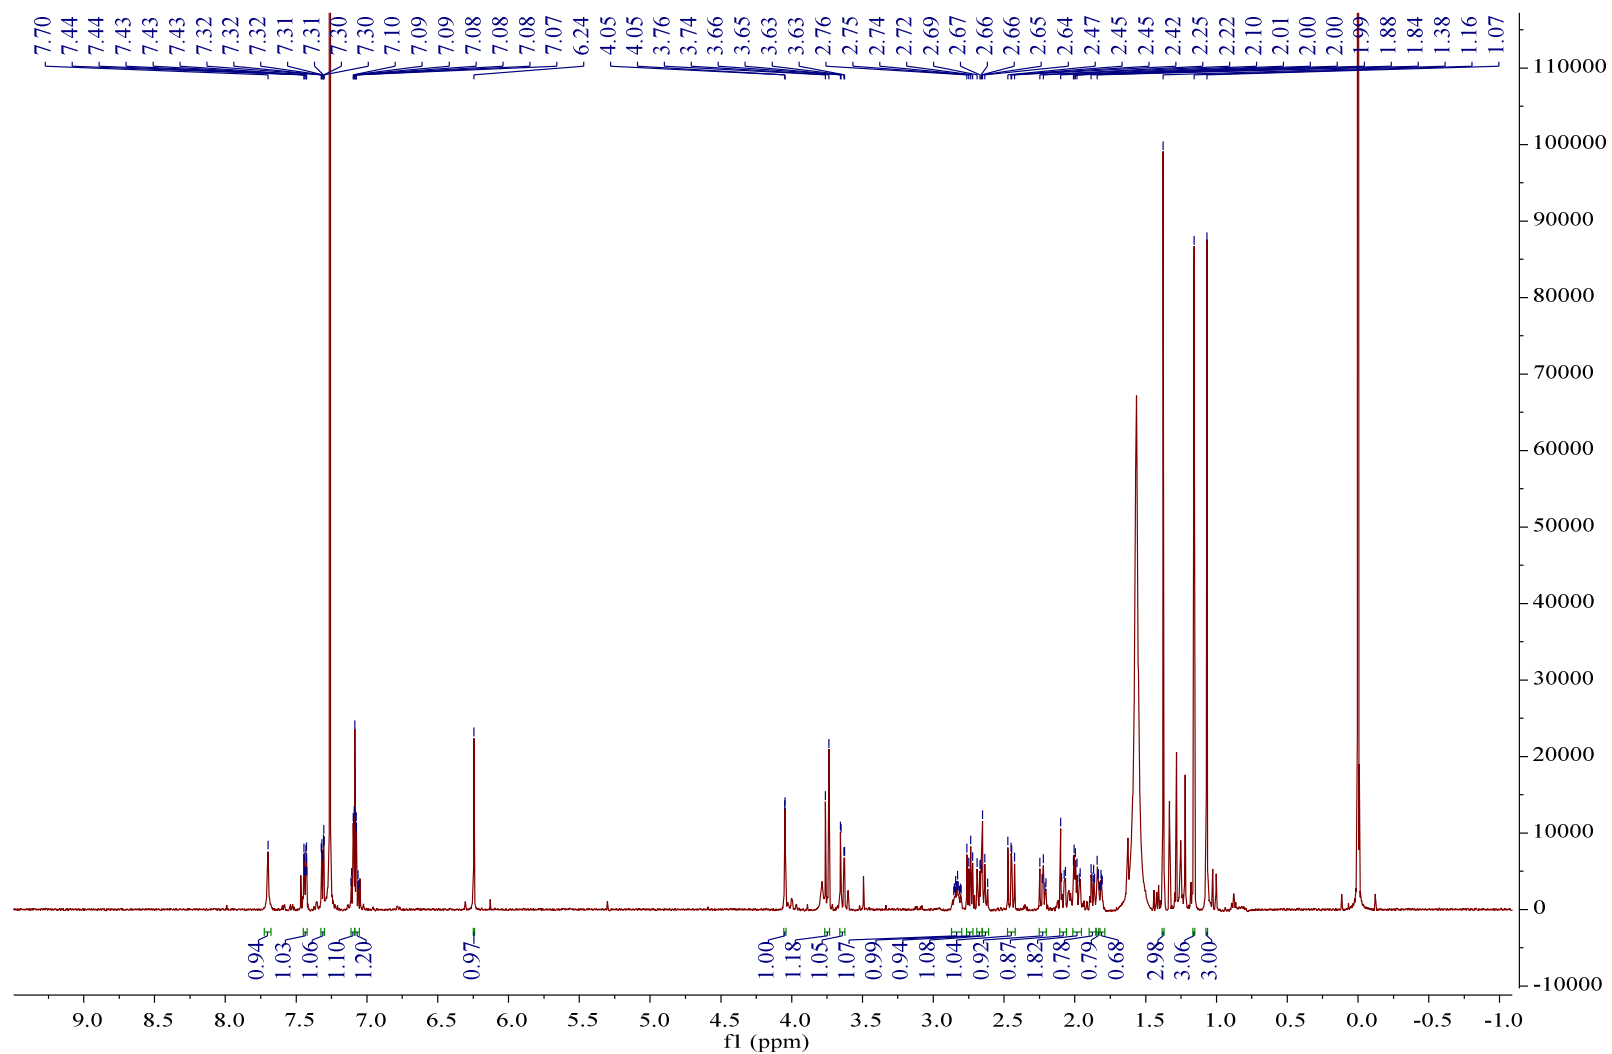

Figure S55.  $^1\text{H}$ -NMR spectrum of **22** in  $\text{CDCl}_3$  at 500 MHz

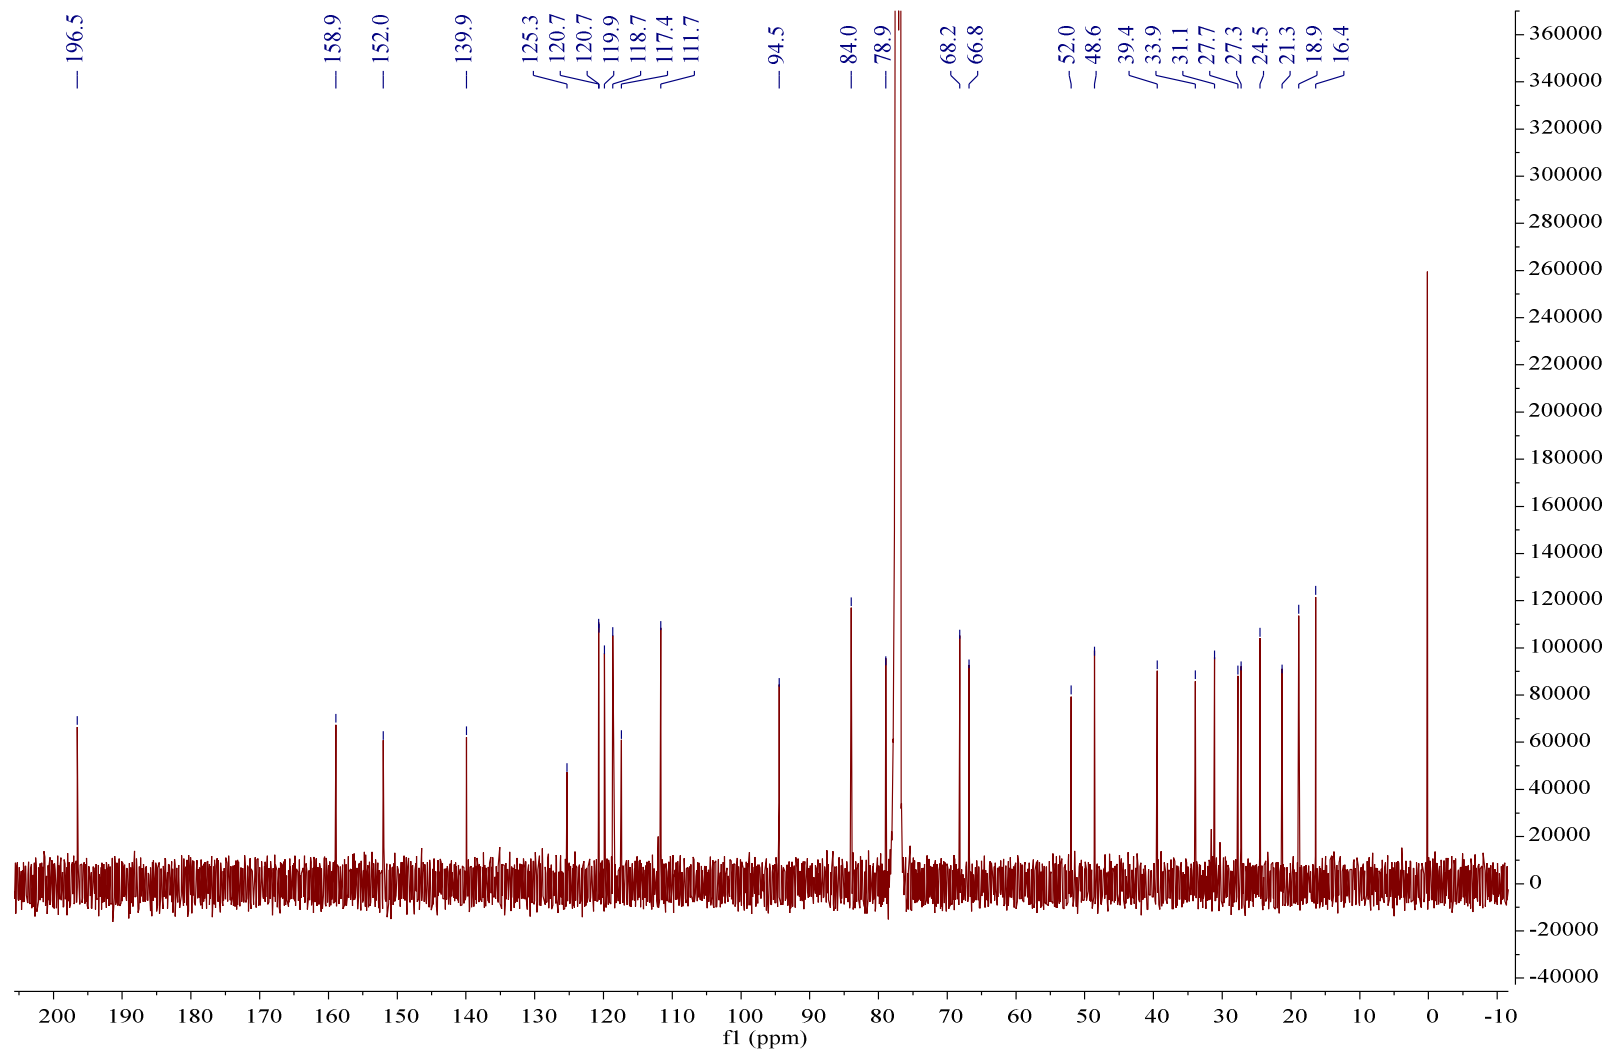

Figure S56.  $^{13}\text{C}$ -NMR spectrum of **22** in  $\text{CDCl}_3$  at 125 MHz



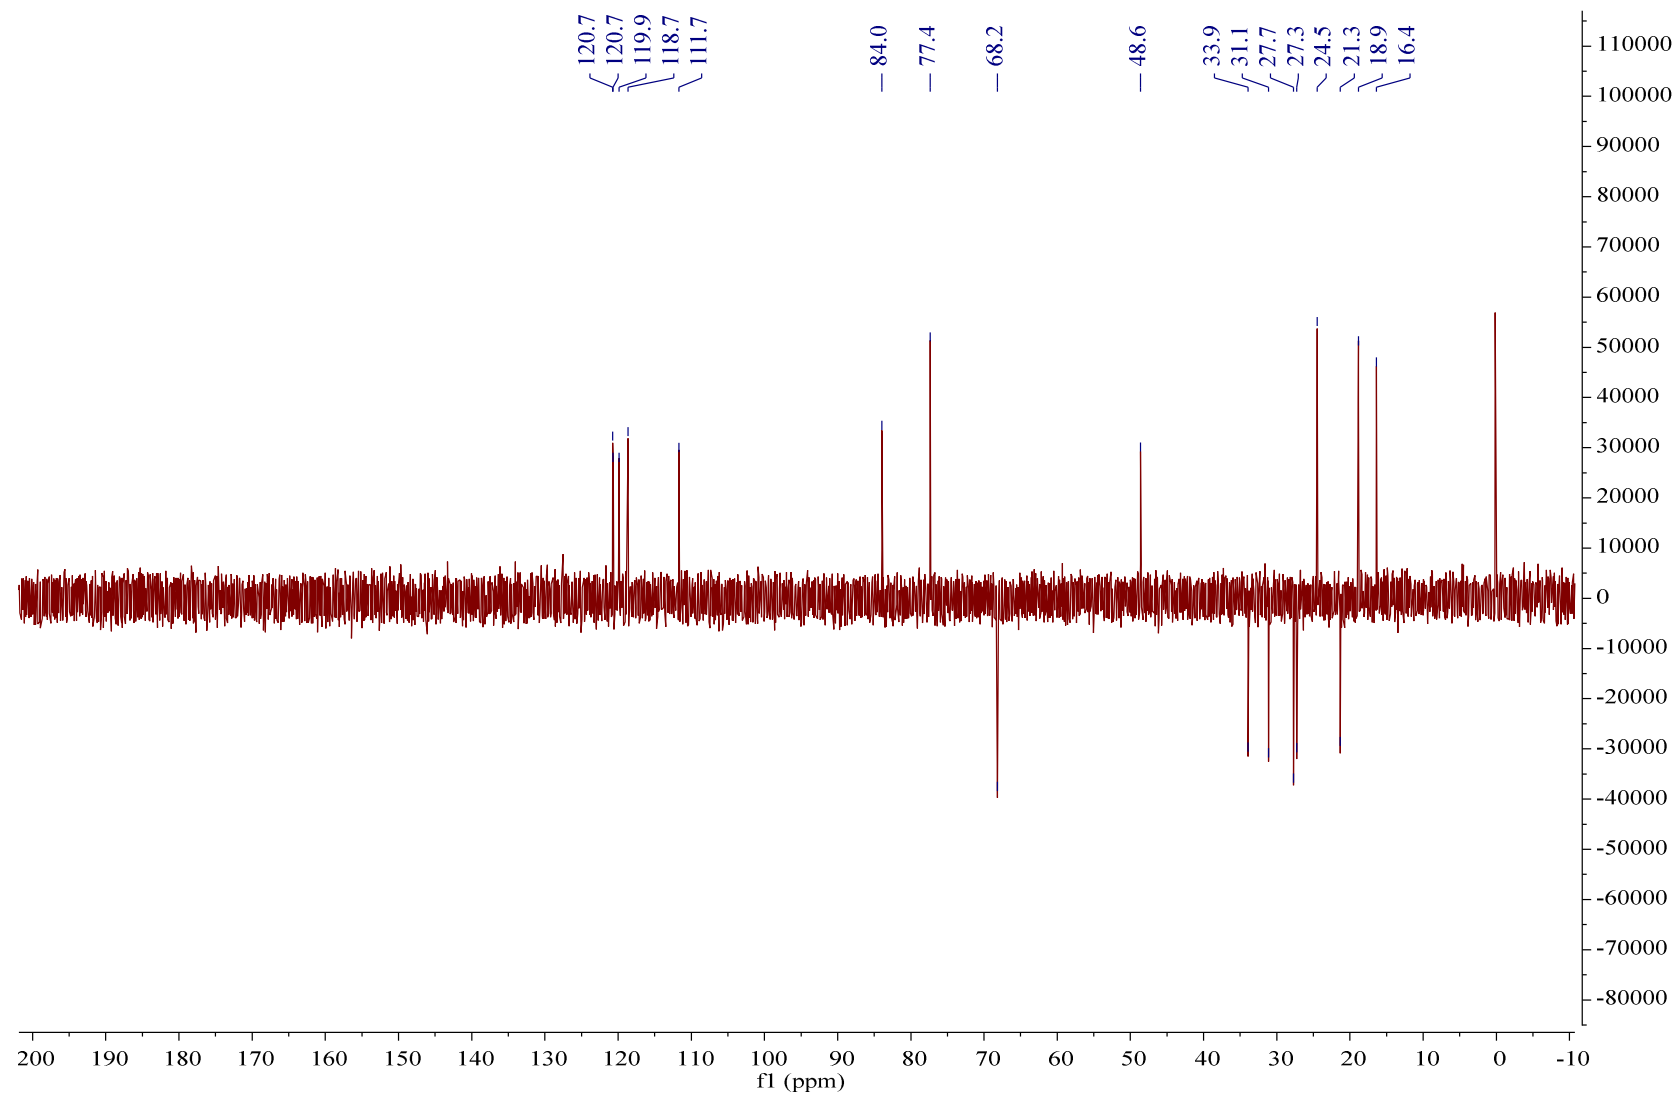

Figure S57. DEPT spectrum of **22** in CDCl<sub>3</sub> at 125 MHz

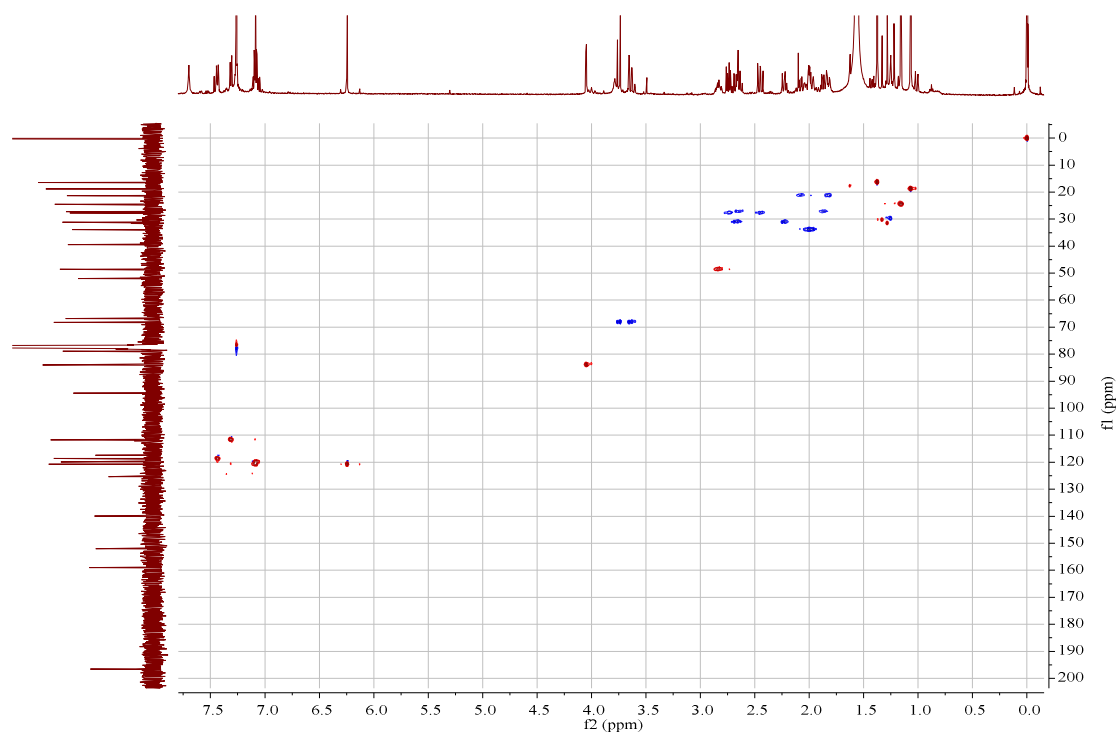

Figure S58. HSQC spectrum of **22** in CDCl<sub>3</sub>

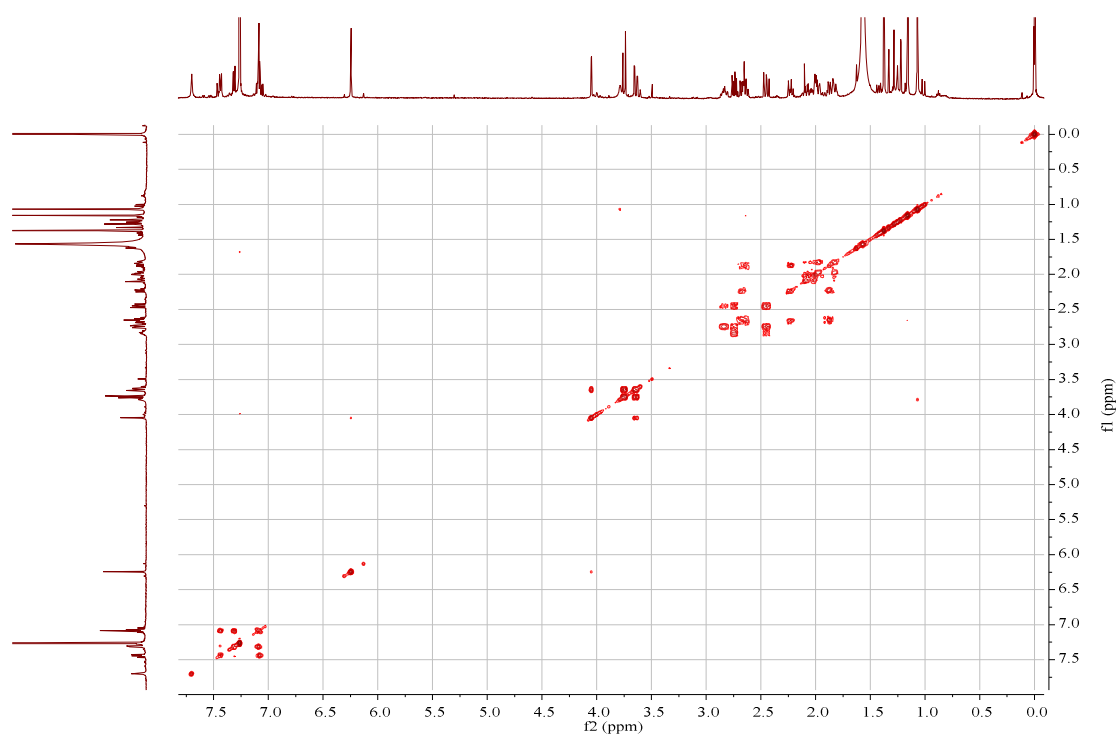

Figure S59. COSY spectrum of **22** in CDCl<sub>3</sub>

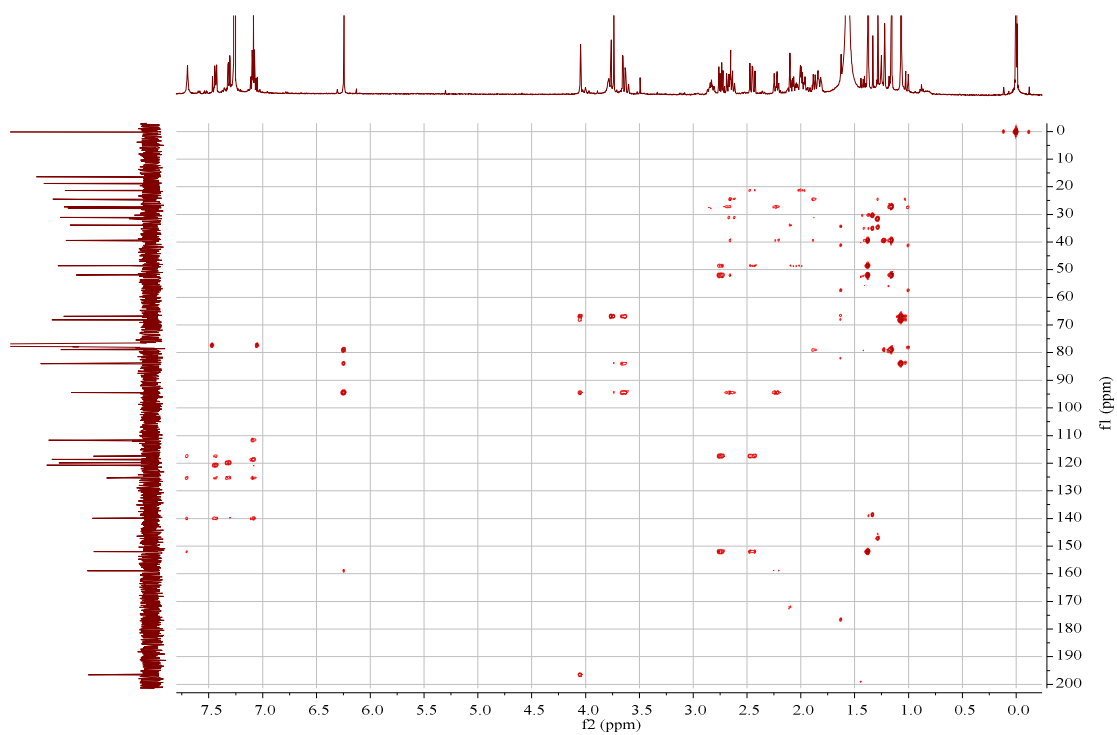

Figure S60. HMBC spectrum of **22** in CDCl<sub>3</sub>

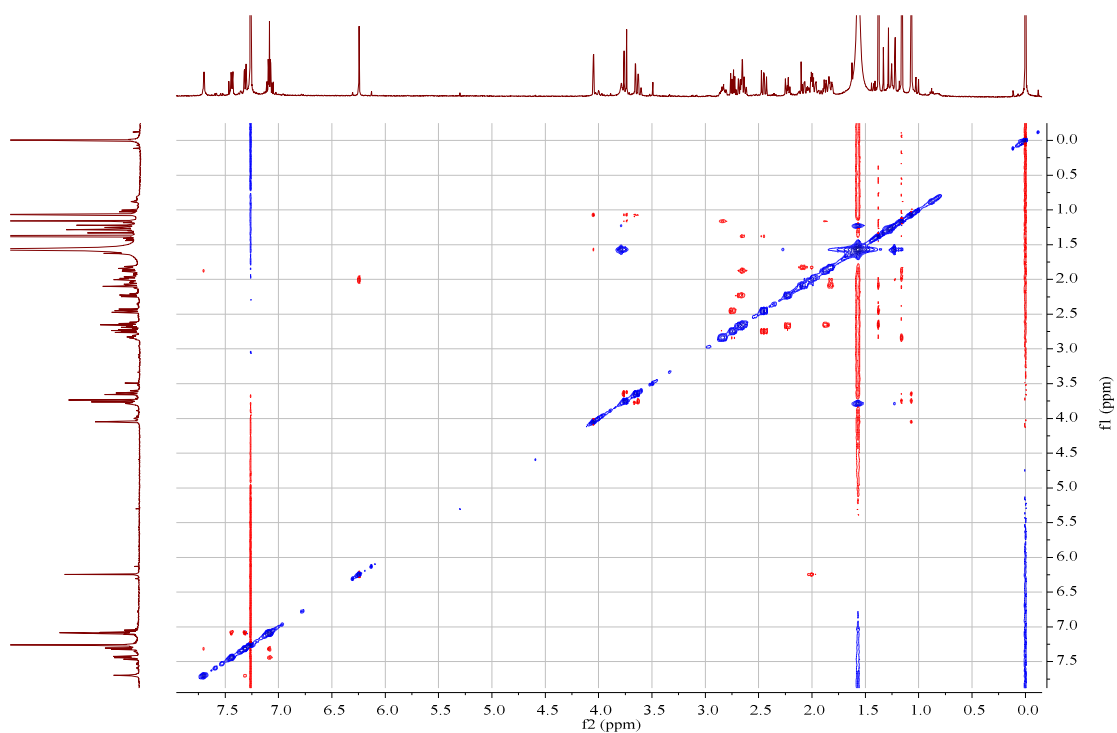

Figure S61. NOESY spectrum of **22** in CDCl<sub>3</sub>

# User Spectra

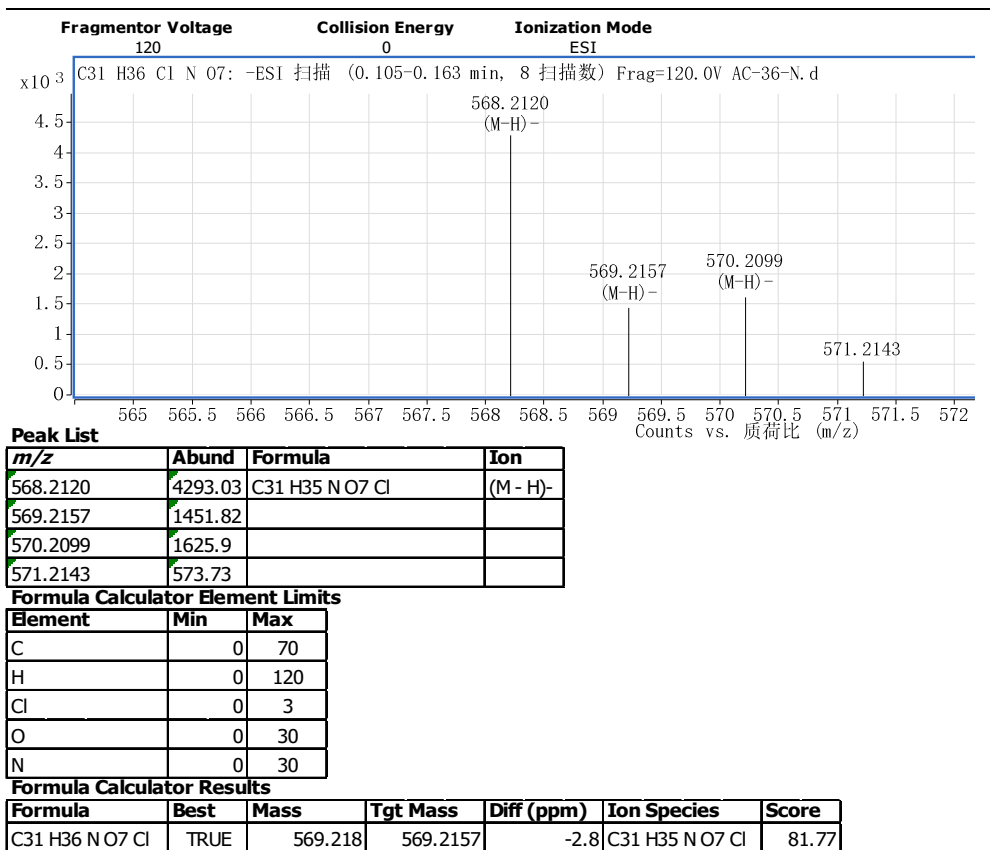

Figure S62. MS of **23**

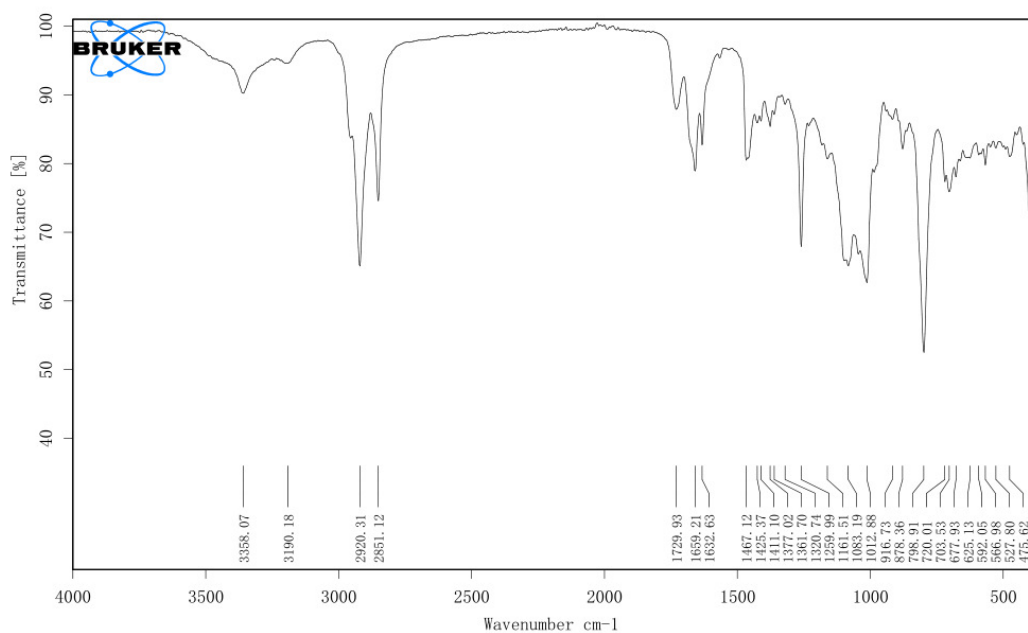

Figure S63. IR (film) of **23**

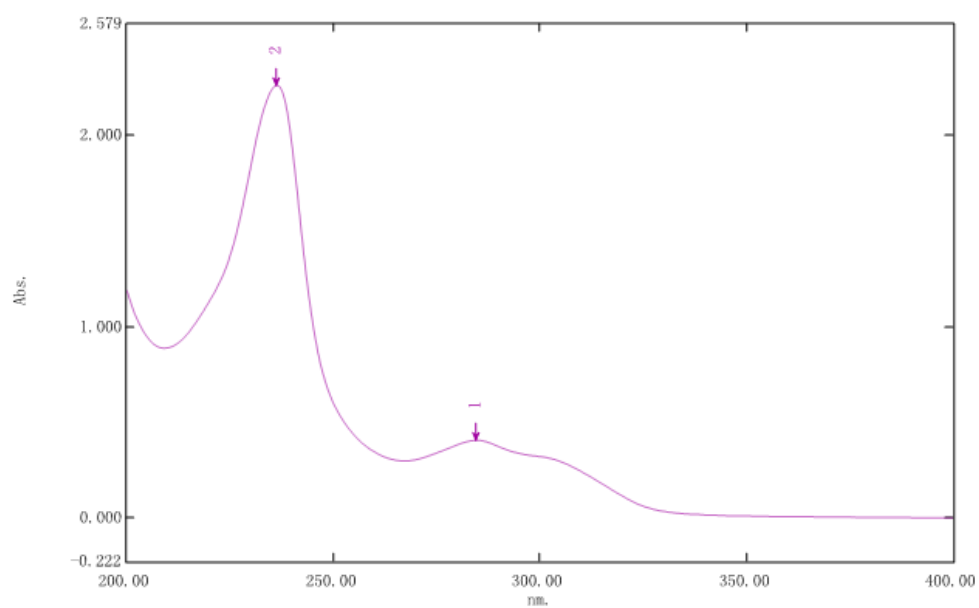

< 峰值检测表 >

| No. | P/V | 波长 (nm) | Abs.  | 描述 |
|-----|-----|---------|-------|----|
| 1   | ⬆️  | 284.80  | 0.407 |    |
| 2   | ⬆️  | 236.40  | 2.256 |    |
| 3   | ⬇️  | 267.40  | 0.300 |    |
| 4   | ⬇️  | 209.40  | 0.887 |    |

Figure S64. UV of **23** in MeCN

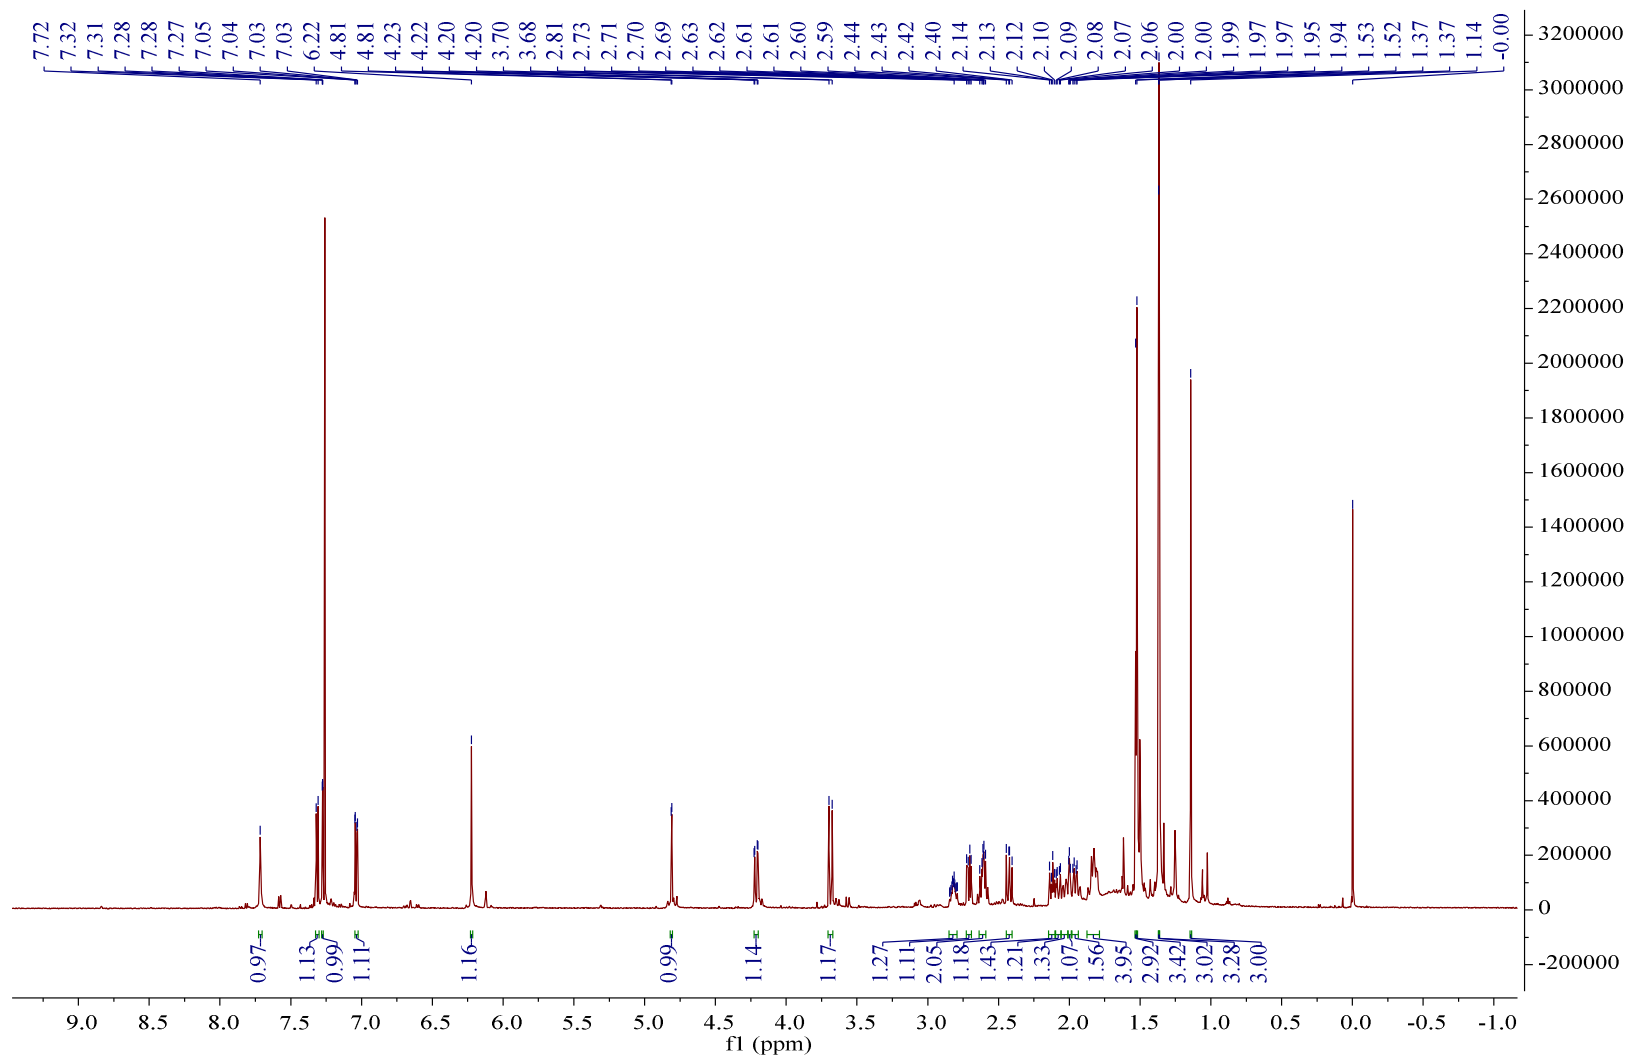

Figure S65. <sup>1</sup>H-NMR spectrum of **23** in CDCl<sub>3</sub> at 600 MHz

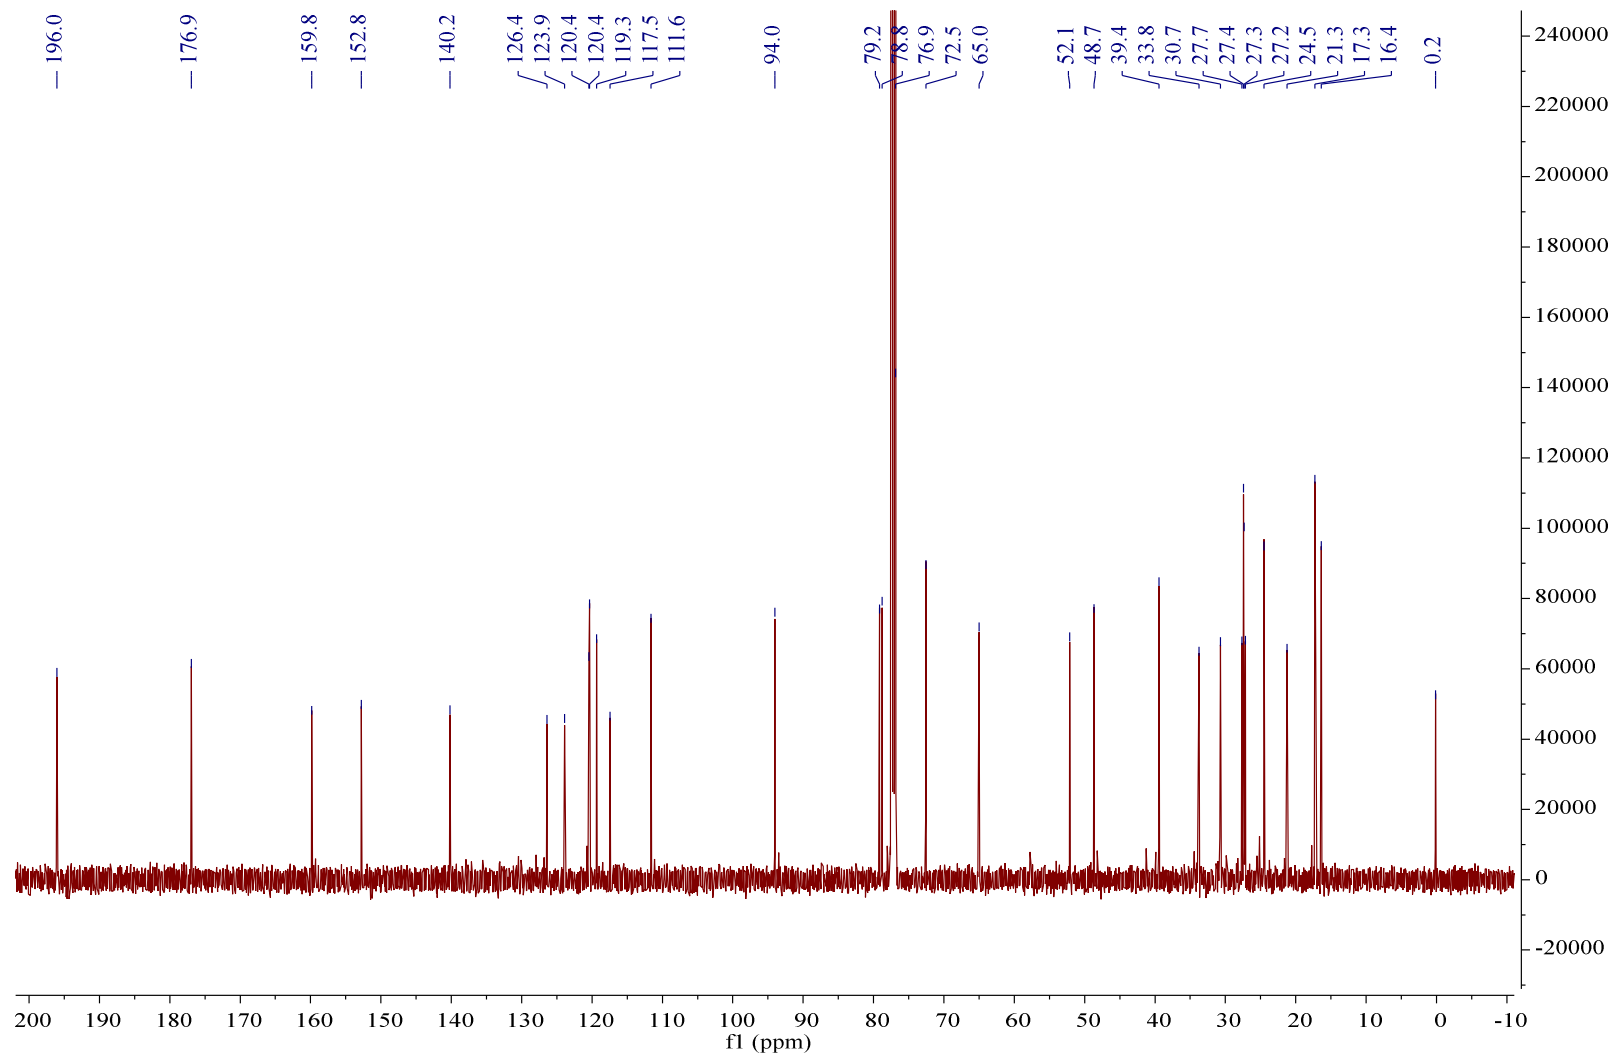

Figure S66.  $^{13}\text{C}$ -NMR spectrum of **23** in  $\text{CDCl}_3$  at 125 MHz

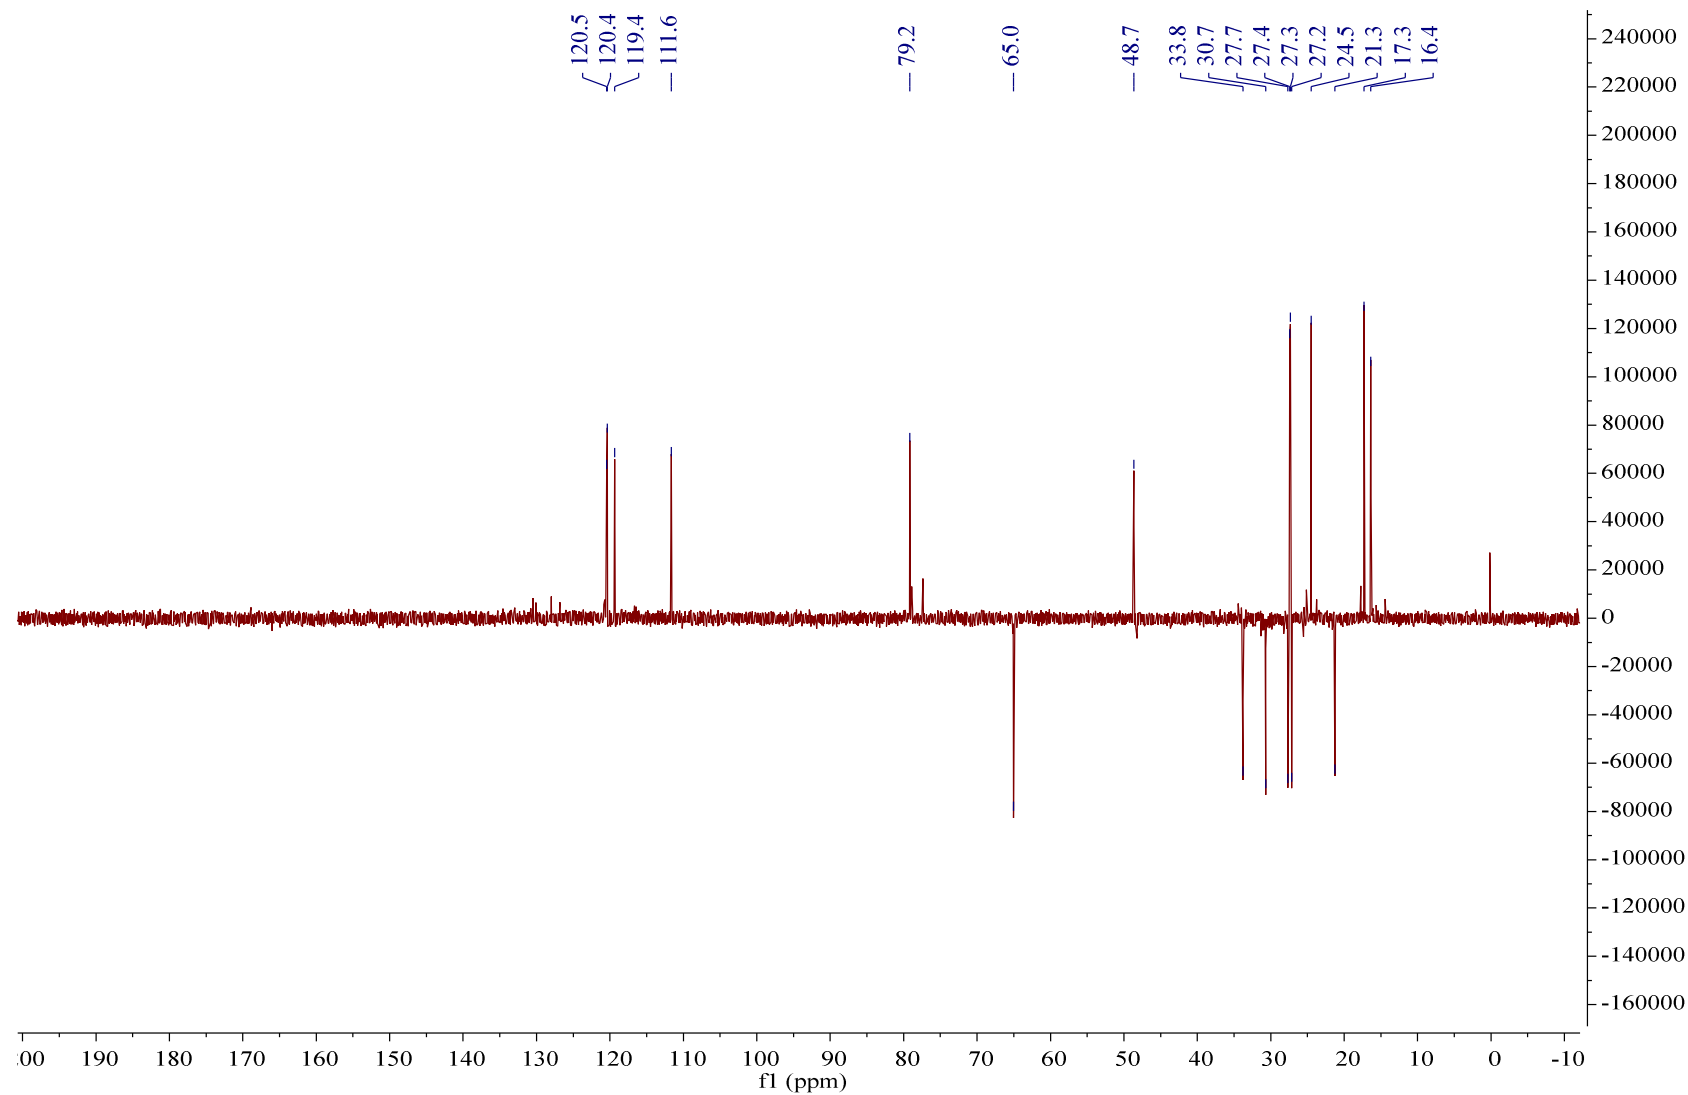

Figure S67. DEPT spectrum of **23** in  $\text{CDCl}_3$  at 125 MHz



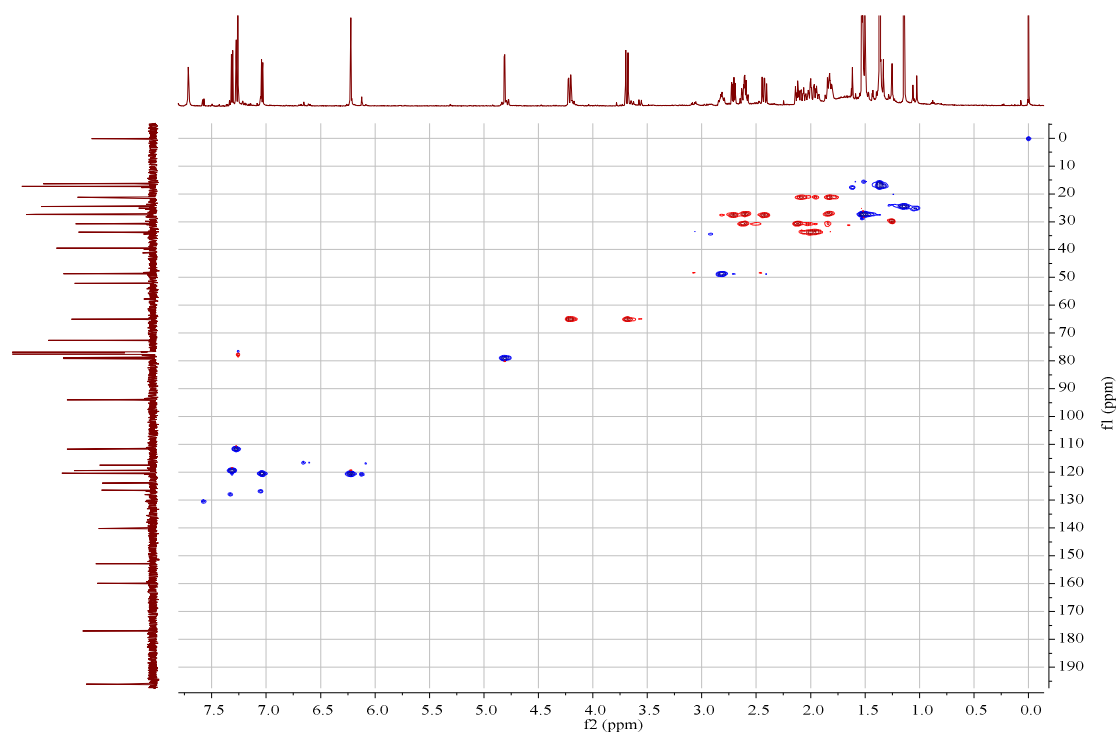

Figure S68. HSQC spectrum of **23** in CDCl<sub>3</sub>

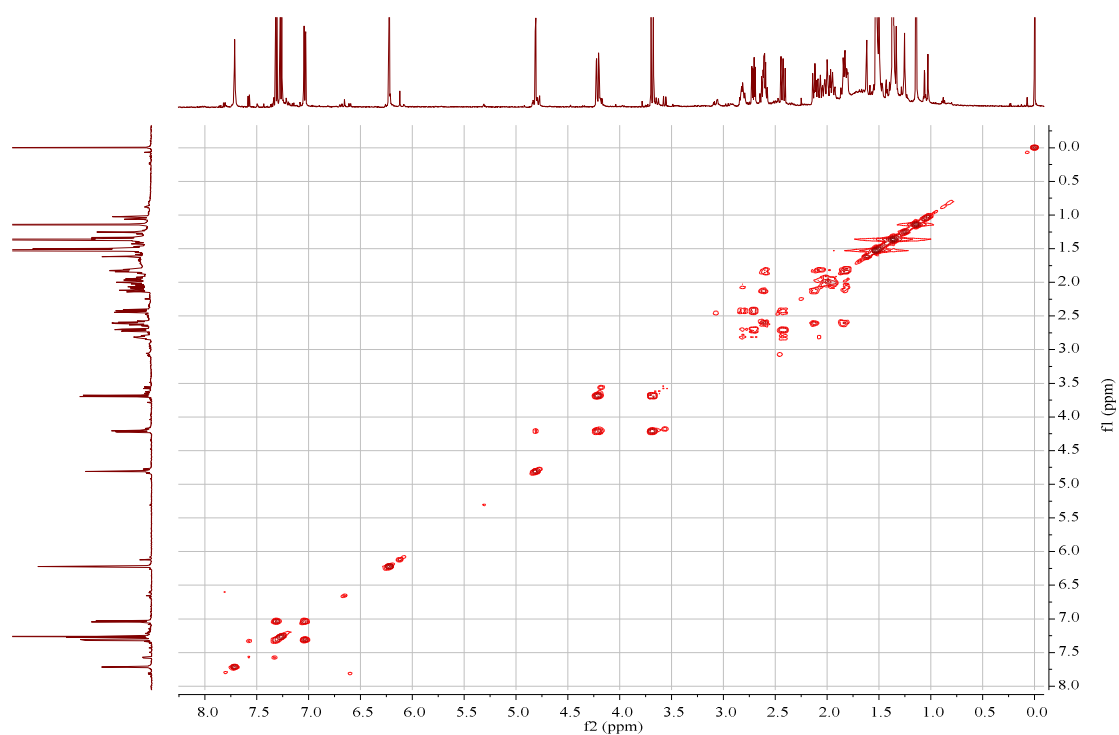

Figure S69. COSY spectrum of **23** in CDCl<sub>3</sub>

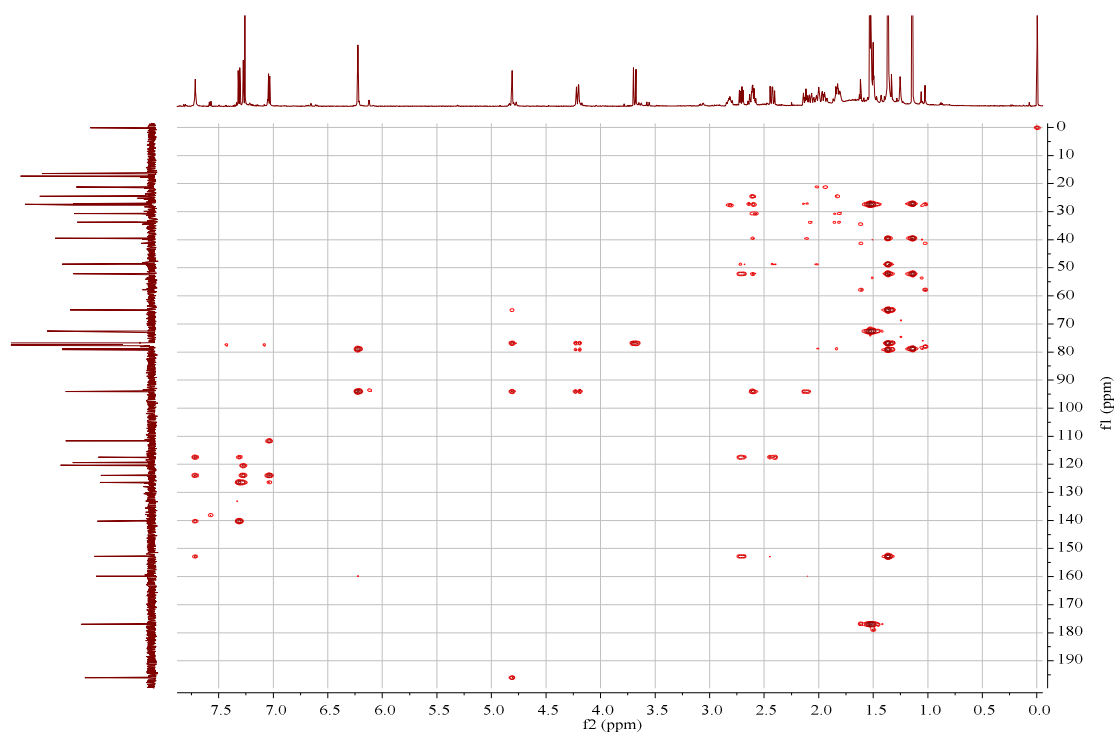

Figure S70. HMBC spectrum of **23** in  $\text{CDCl}_3$

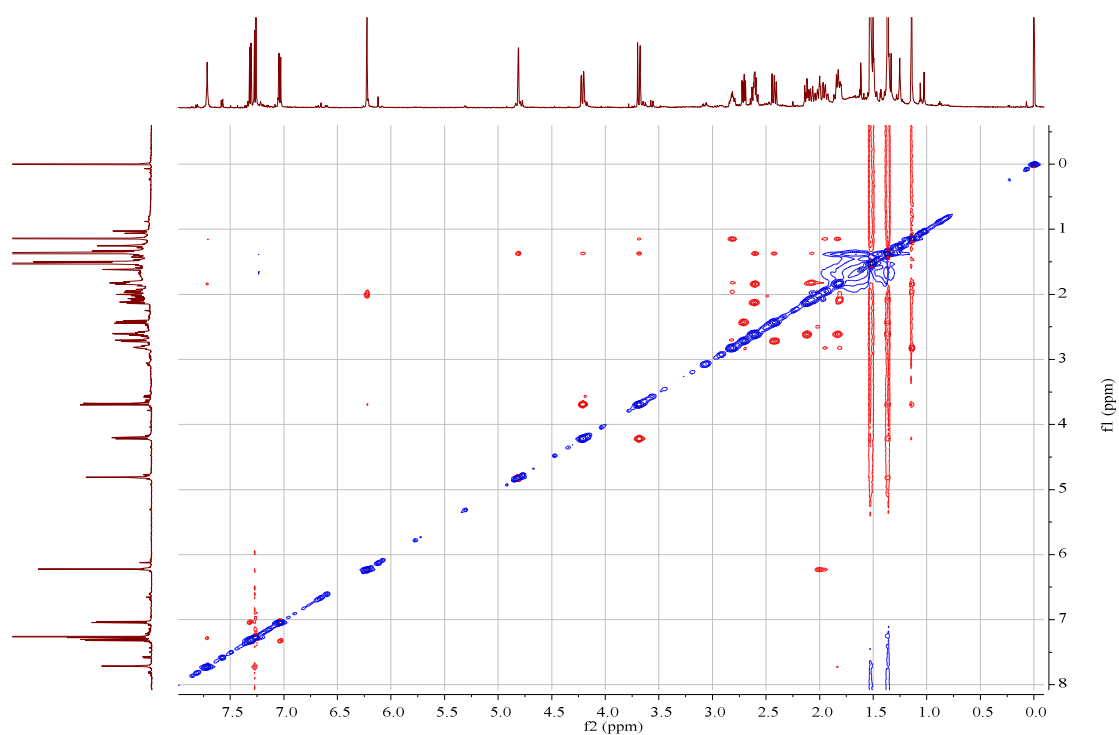

Figure S71. NOESY spectrum of **23** in  $\text{CDCl}_3$

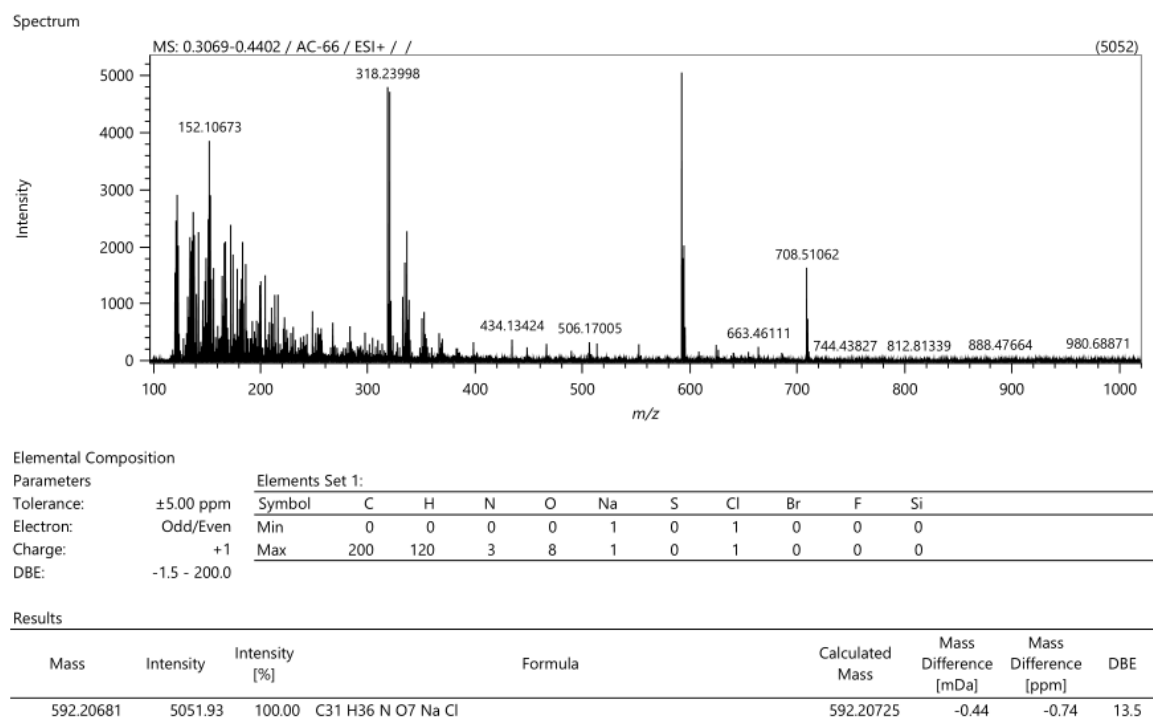

Figure S72. MS of **24**

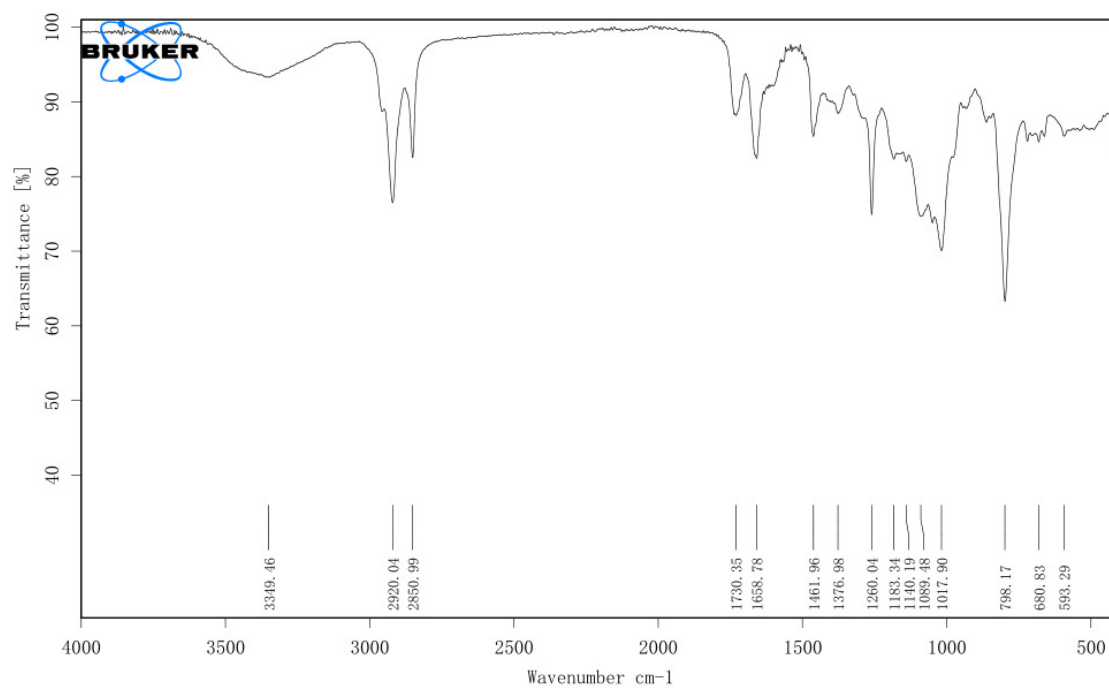

Figure S73. IR (film) of **24**

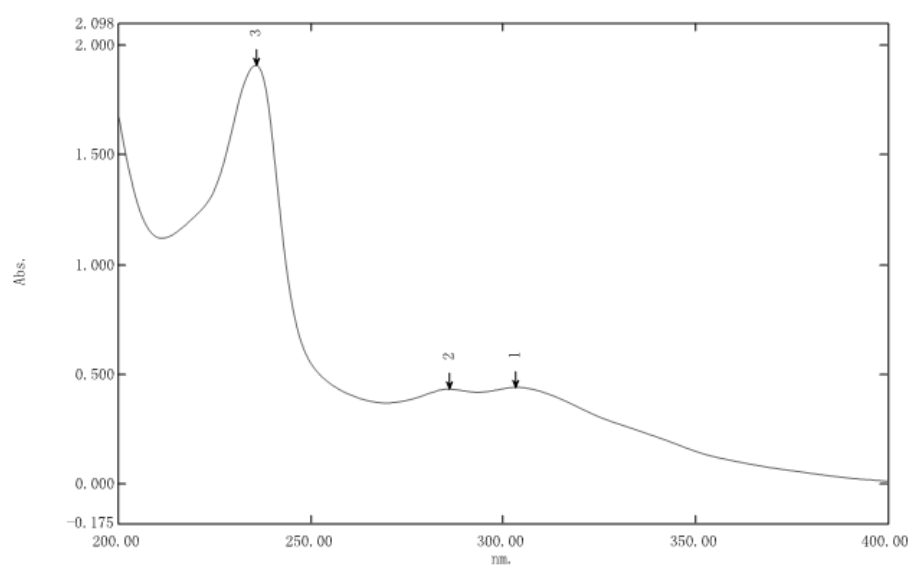

| No. | P/V | 波长 (nm) | Abs.  | 描述 |
|-----|-----|---------|-------|----|
| 1   |     | 303.40  | 0.442 |    |
| 2   |     | 286.20  | 0.434 |    |
| 3   |     | 235.80  | 1.909 |    |
| 4   |     | 293.20  | 0.419 |    |
| 5   |     | 270.00  | 0.370 |    |
| 6   |     | 211.20  | 1.121 |    |

Figure S74. UV of **24** in MeCN

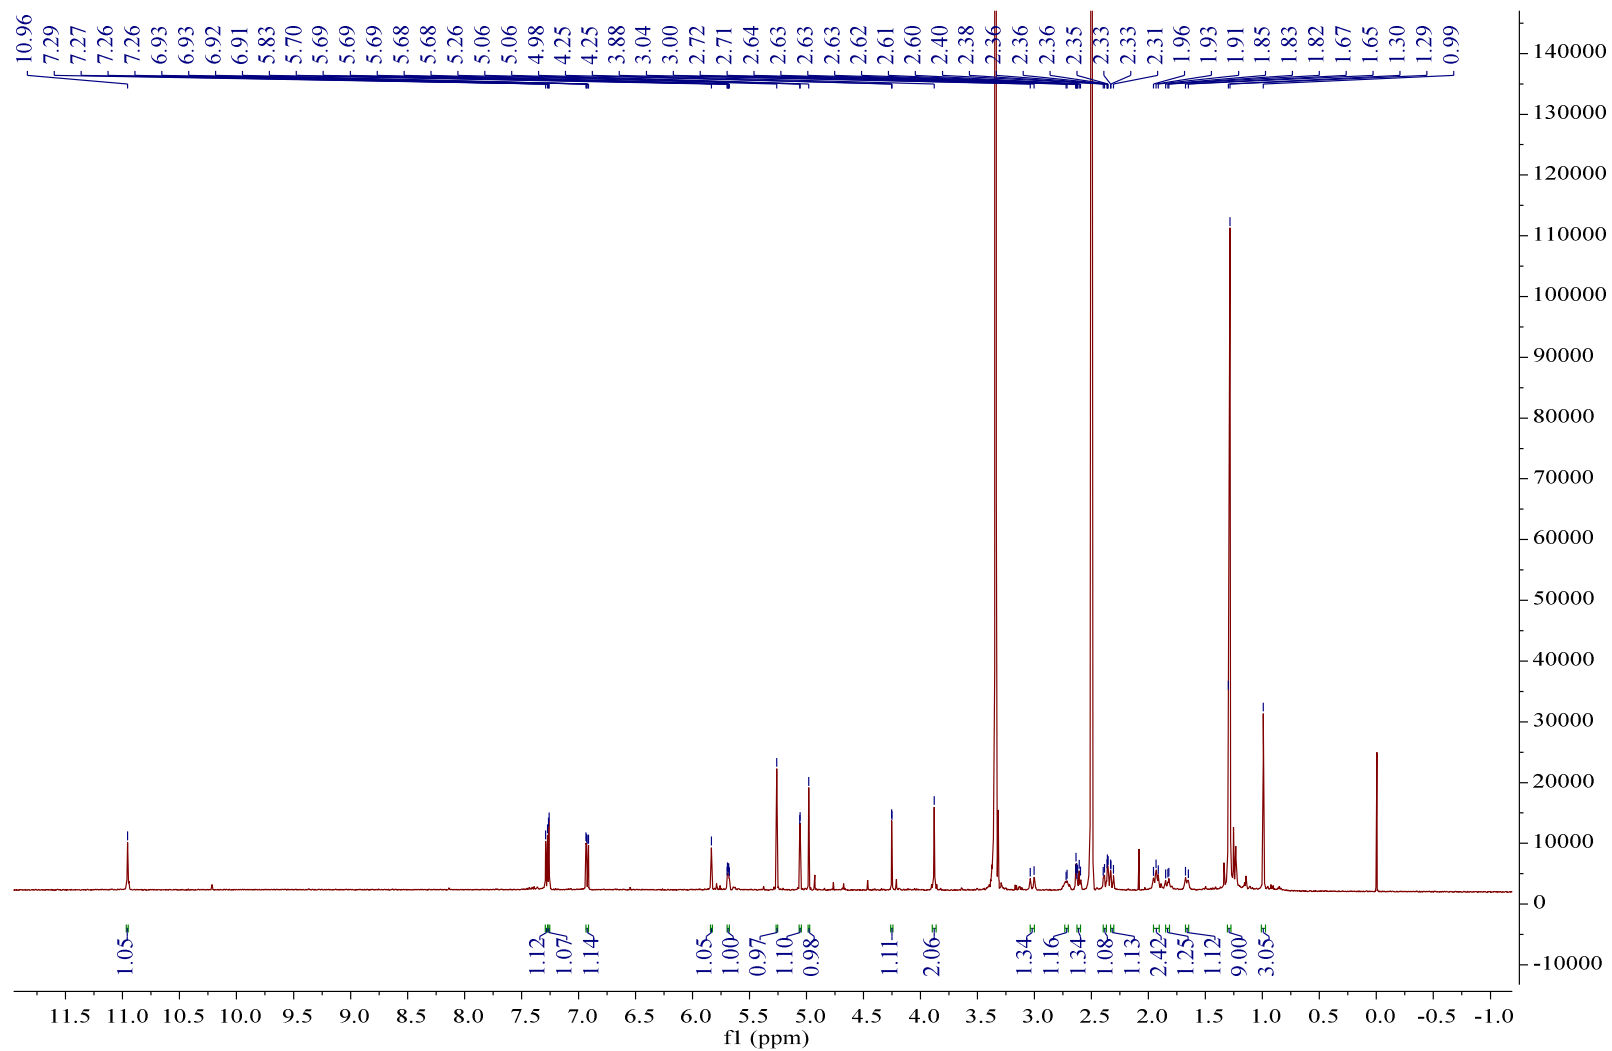

Figure S75. <sup>1</sup>H-NMR spectrum of **24** in DMSO at 500 MHz

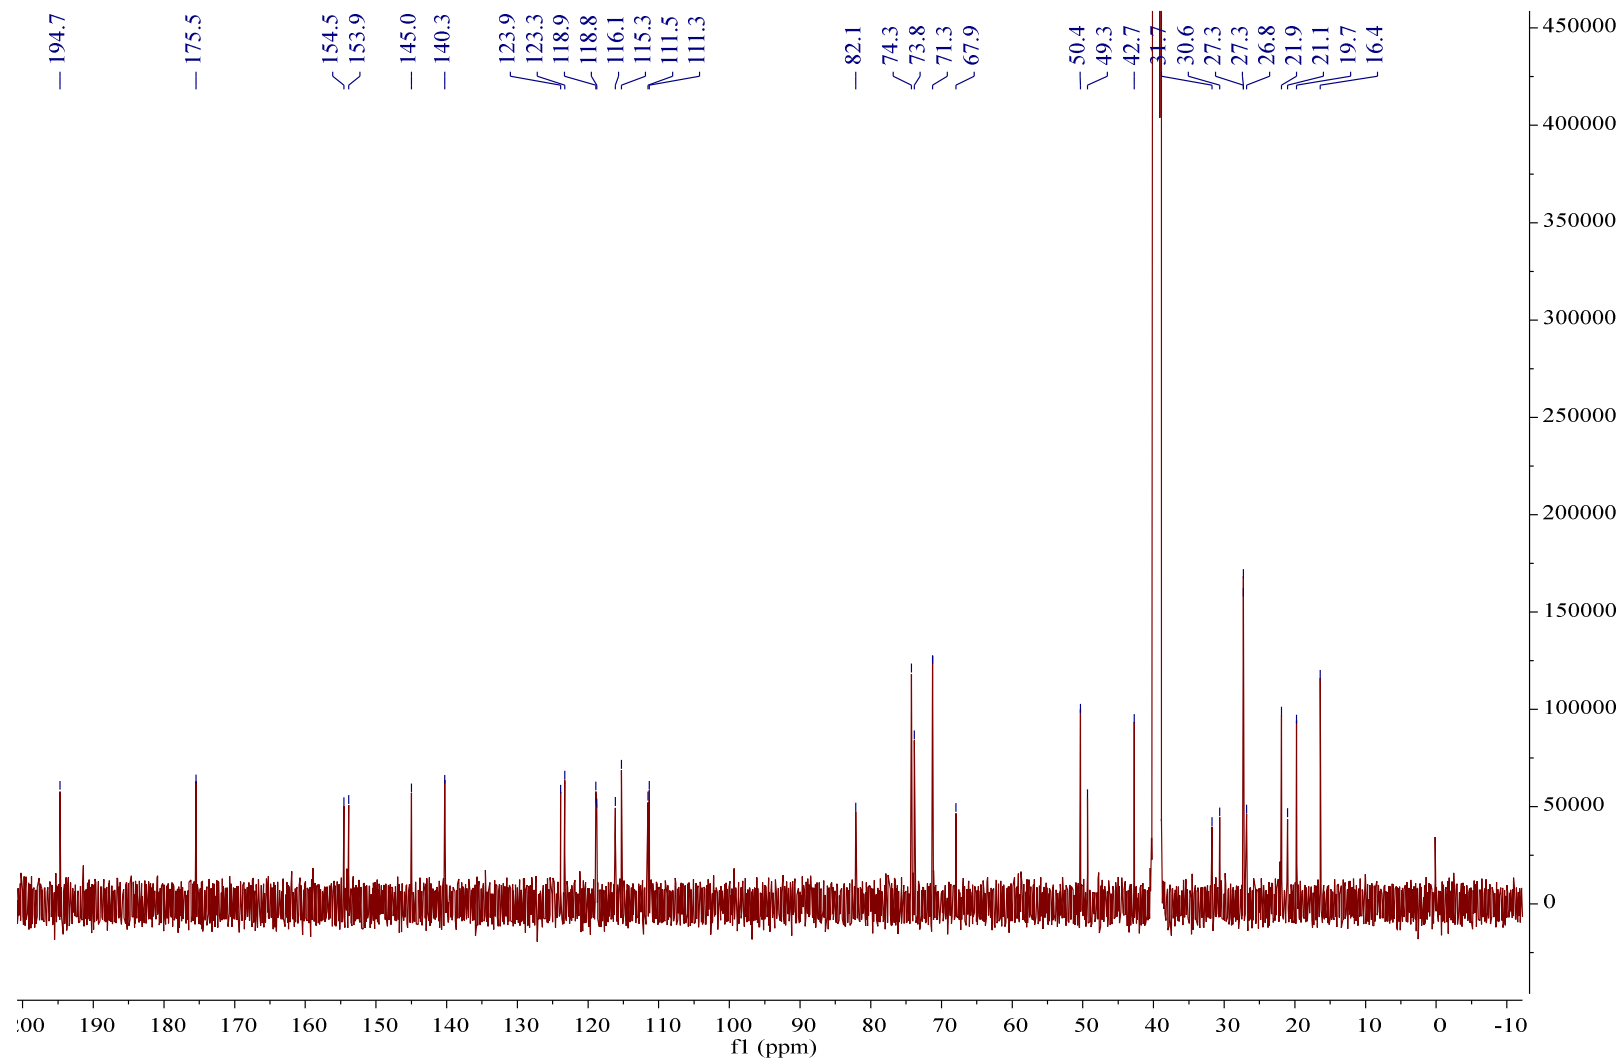

Figure S76.  $^{13}\text{C}$ -NMR spectrum of **24** in DMSO at 125 MHz

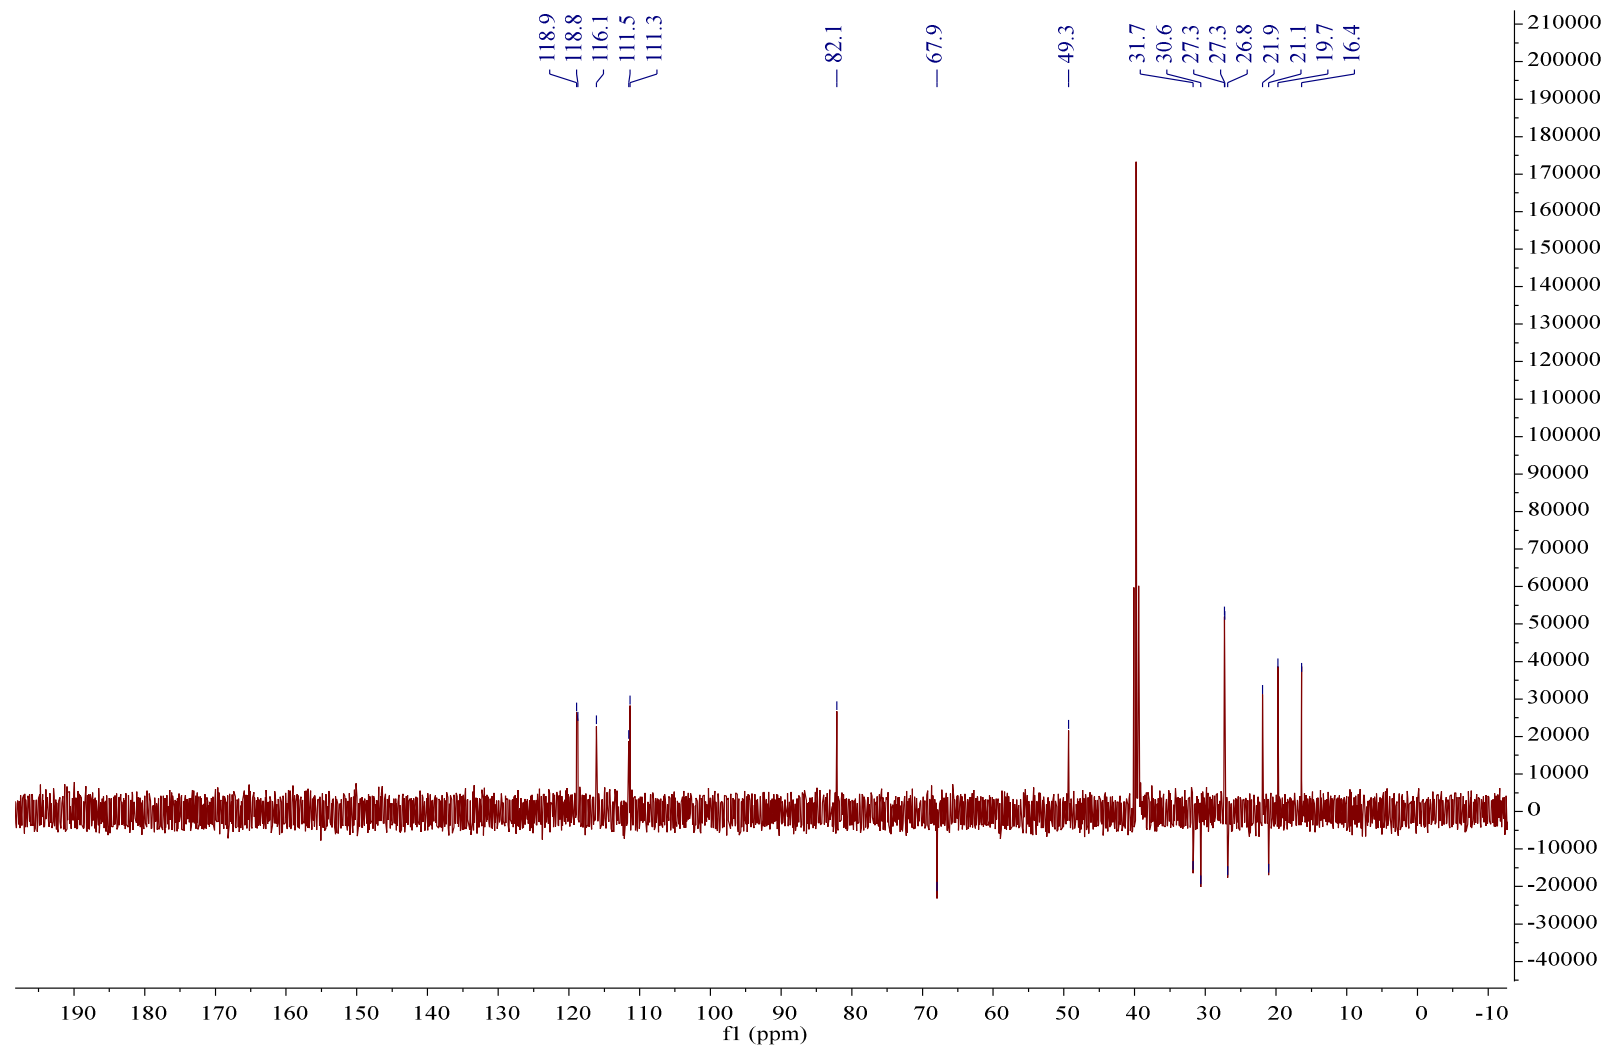

Figure S77. DEPT spectrum of **24** in DMSO at 125 MHz

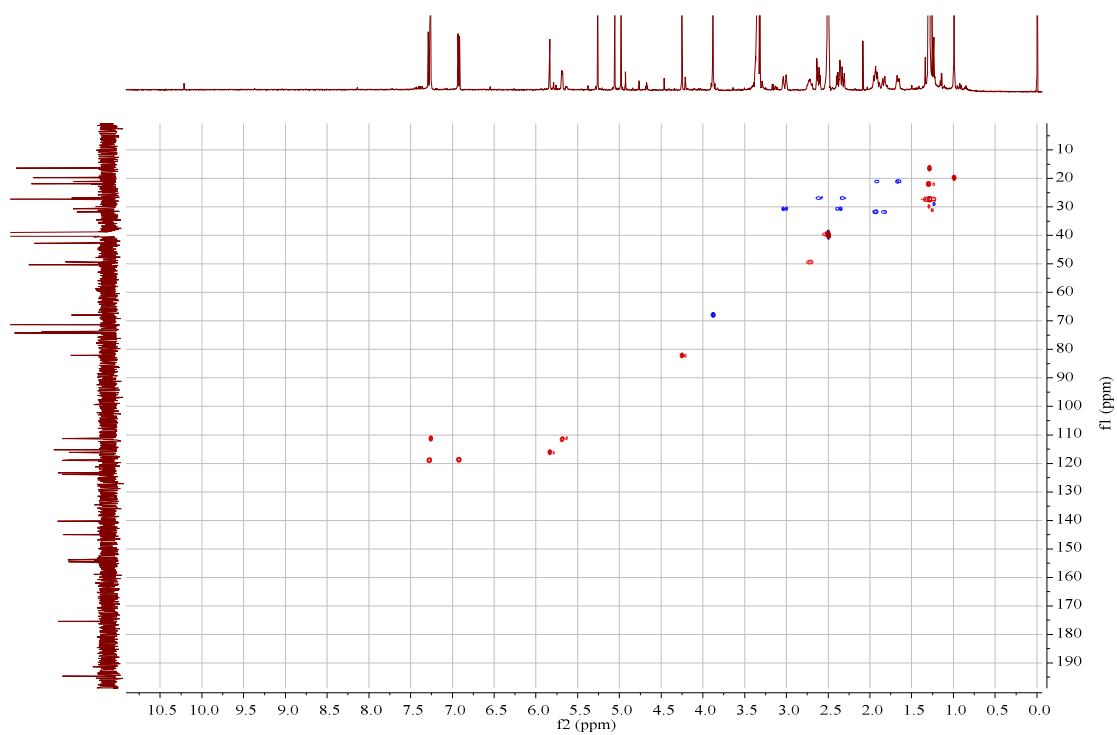

Figure S78. HSQC spectrum of **24** in DMSO

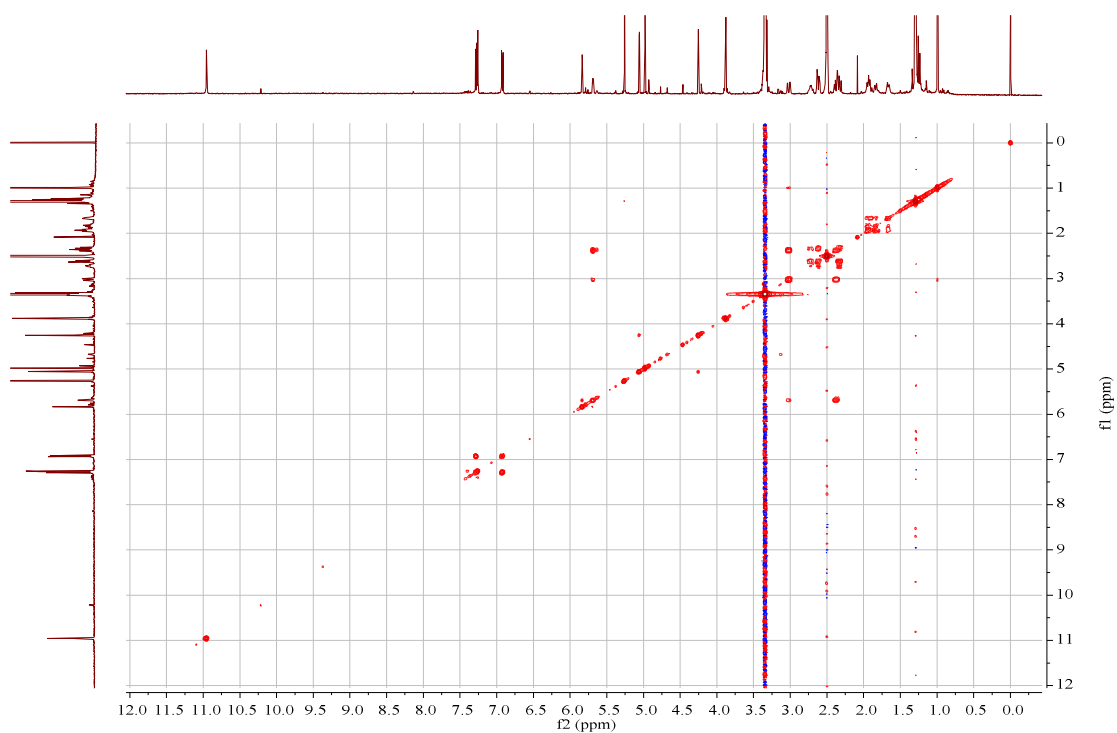

Figure S79. COSY spectrum of **24** in DMSO



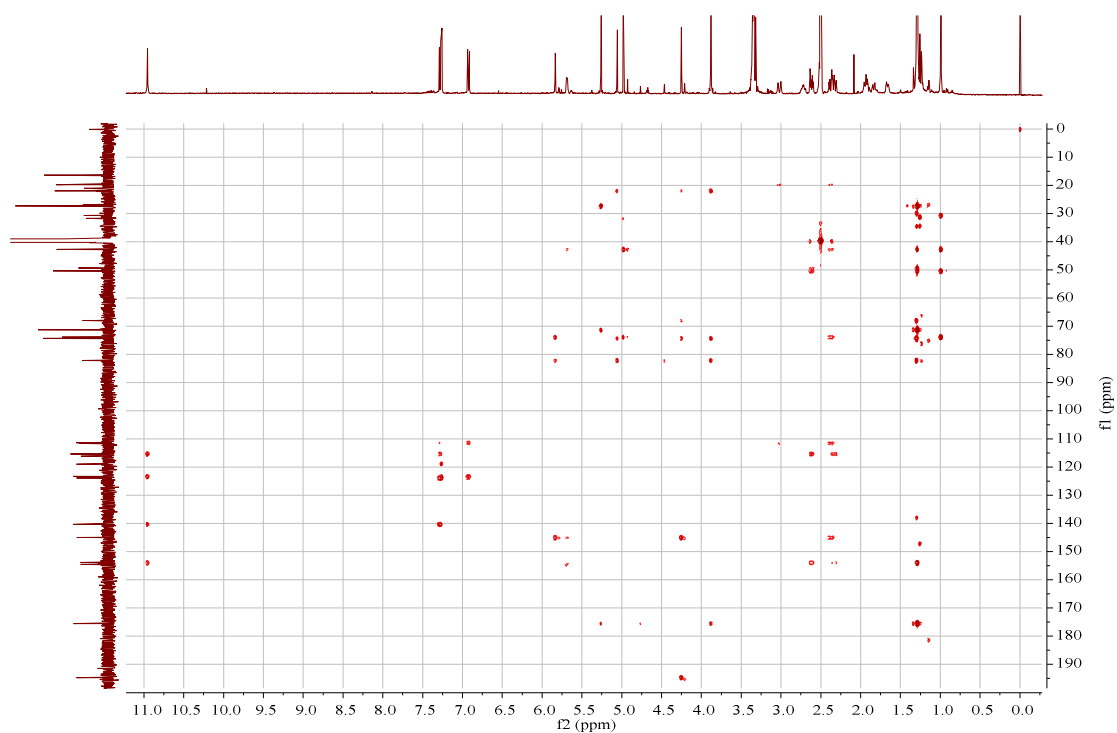

Figure S80. HMBC spectrum of **24** in DMSO

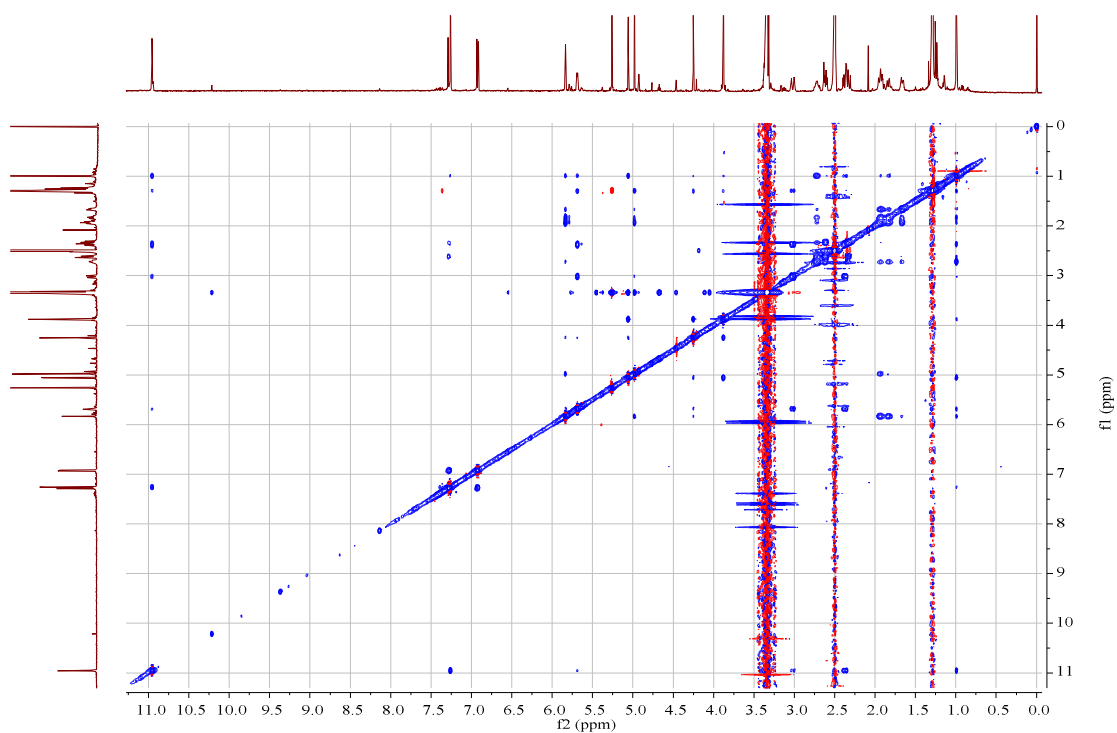

Figure S81. NOESY spectrum of **24** in DMSO

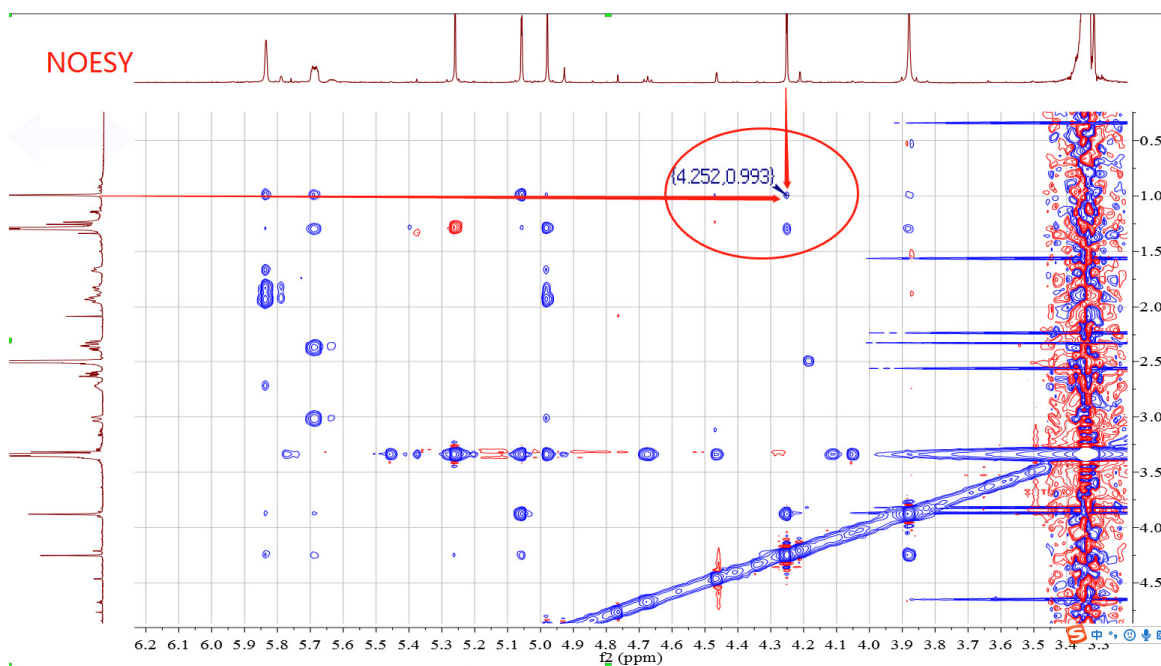

Figure S82. NOESY spectrum (enlarge) of **24** in DMSO

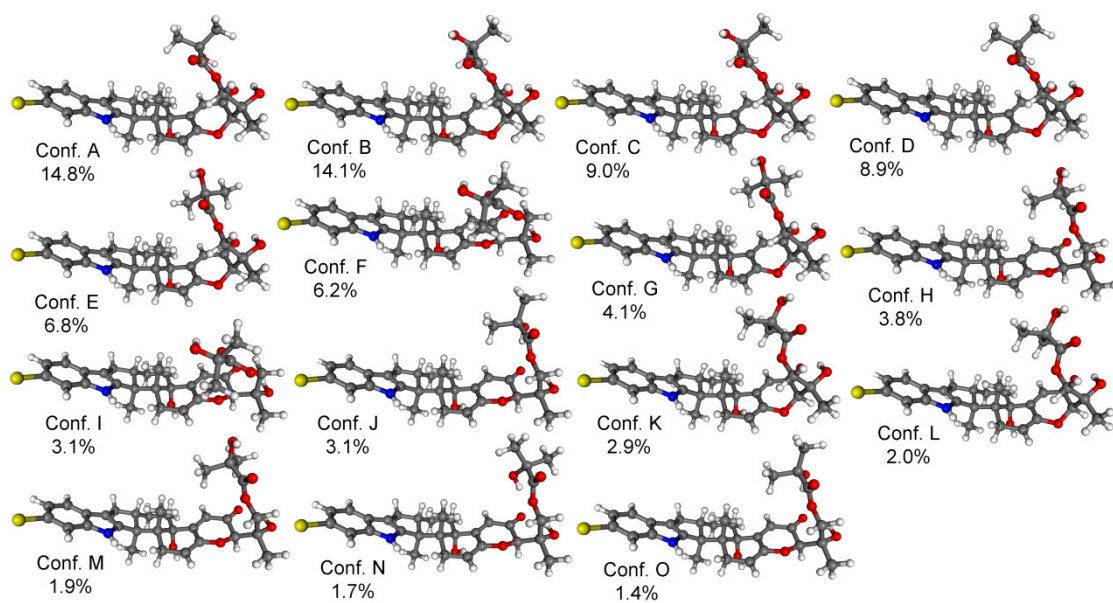

Figure S83. Structure and population of the low-energy  $\omega$ B97X/TZVP PCM/MeCN conformers ( $> 1\%$ ) of (3*S*,4*R*,9*R*,13*S*,16*S*,27*S*)-**24**.

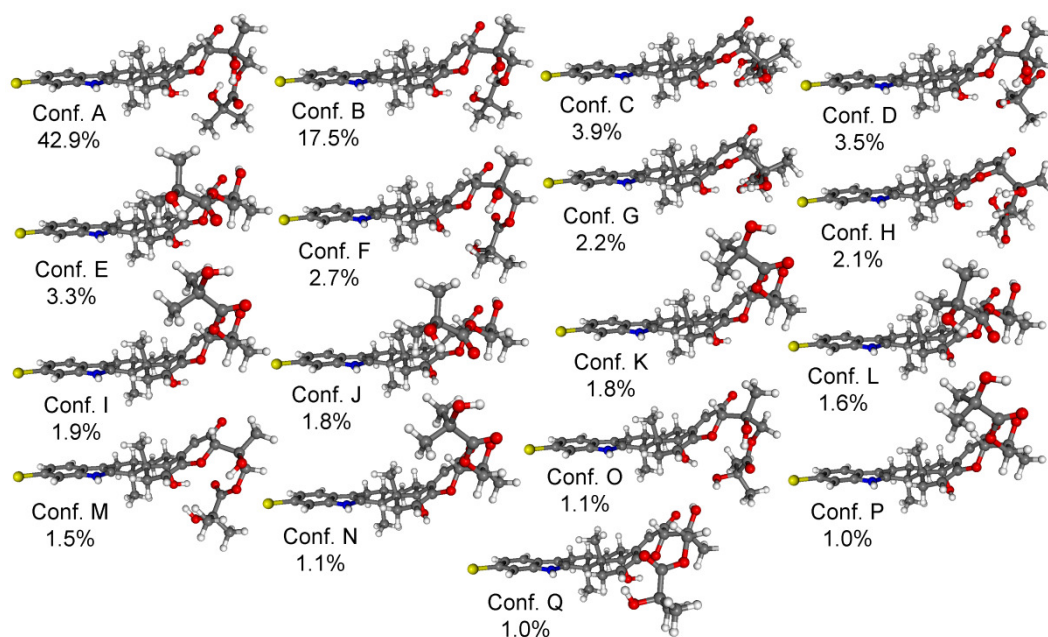

Figure S84. Structure and population of the low-energy  $\omega$ B97X/TZVP PCM/MeCN conformers (> 1%) of (3*S*,4*R*,9*S*,13*S*,16*S*,27*S*)-**24**.

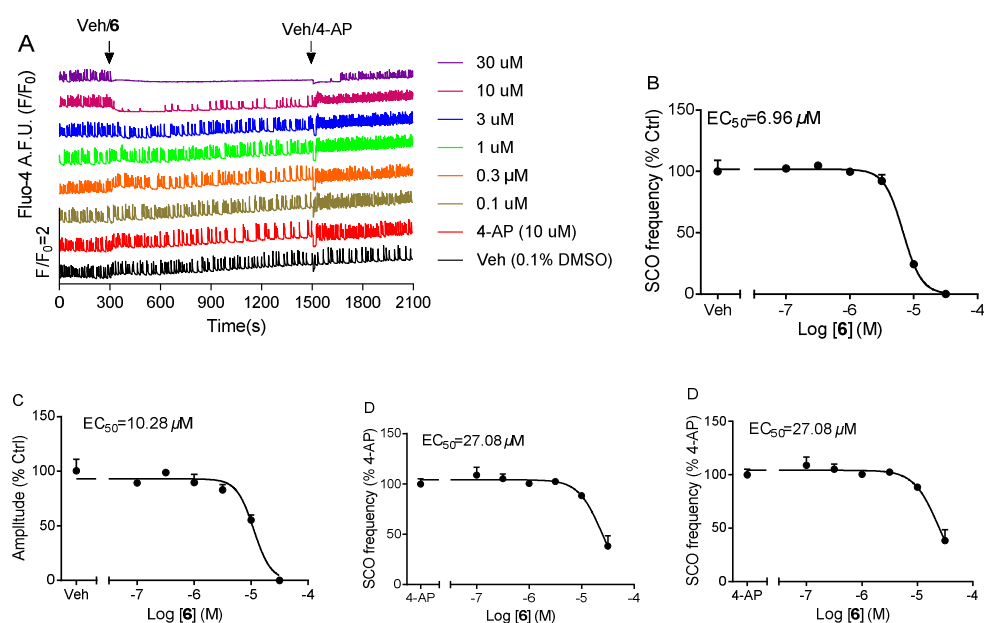

Figure S85. Effects of **6** on SCOs in primary cultured cortical neurons.

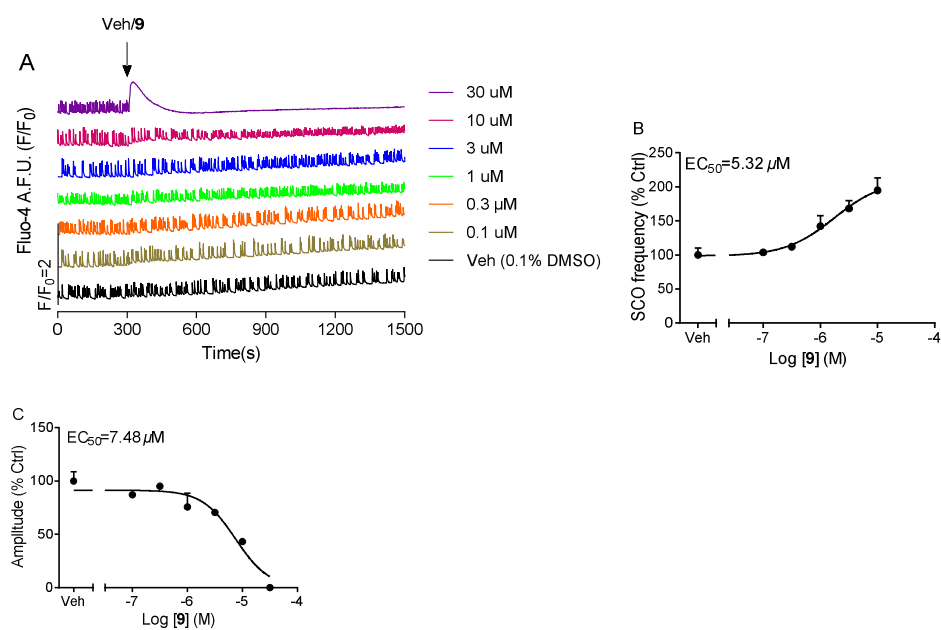

Figure S86. Effects of **9** on SCOs in primary cultured cortical neurons.

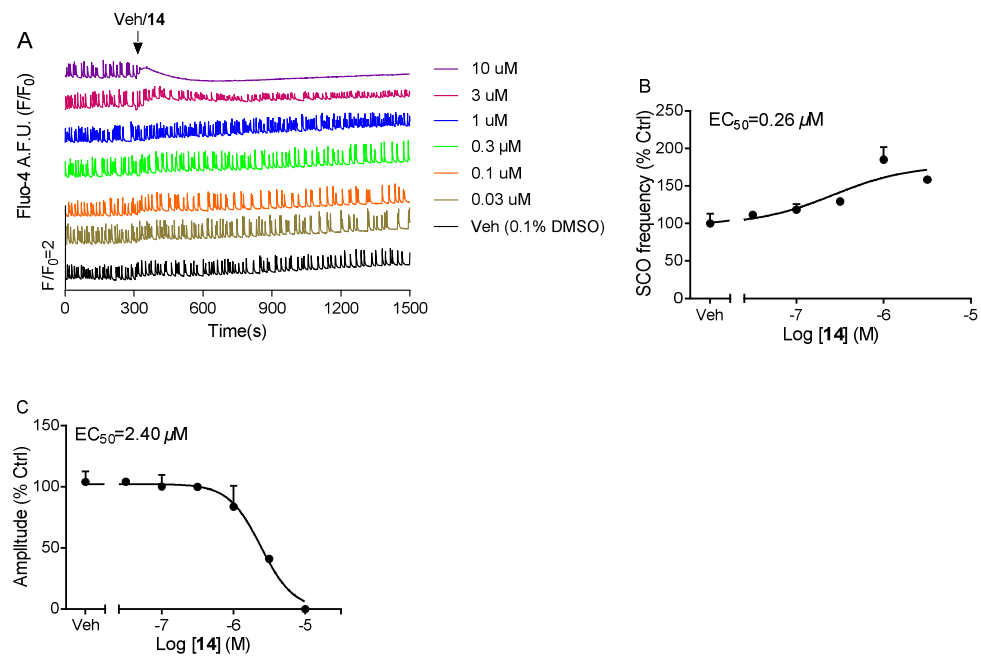

Figure S87. Effects of **14** on SCOs in primary cultured cortical neurons.

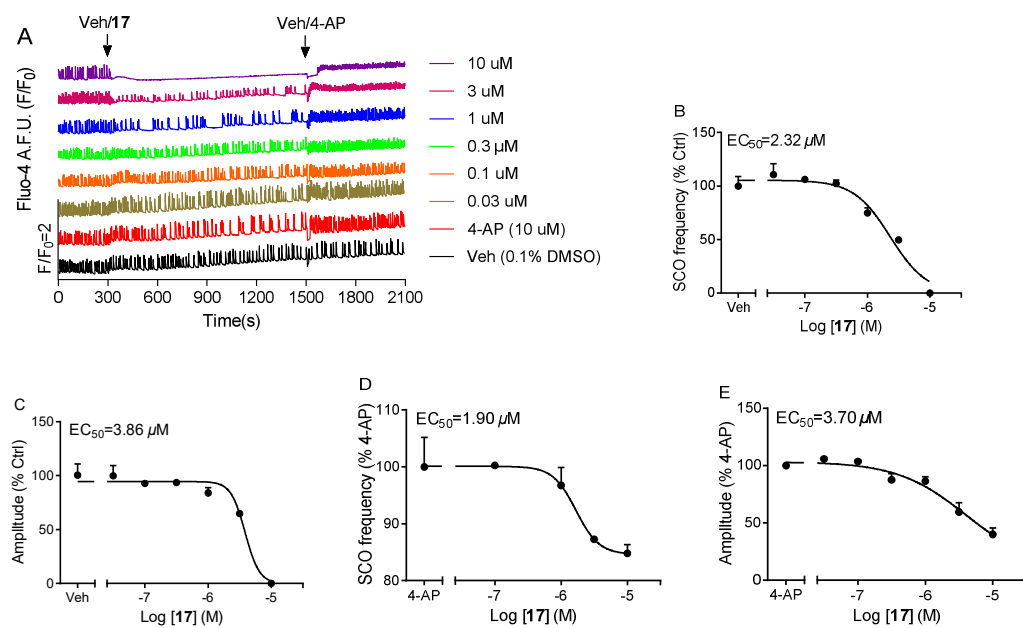

Figure S88. Effects of **17** on SCOs in primary cultured cortical neurons.

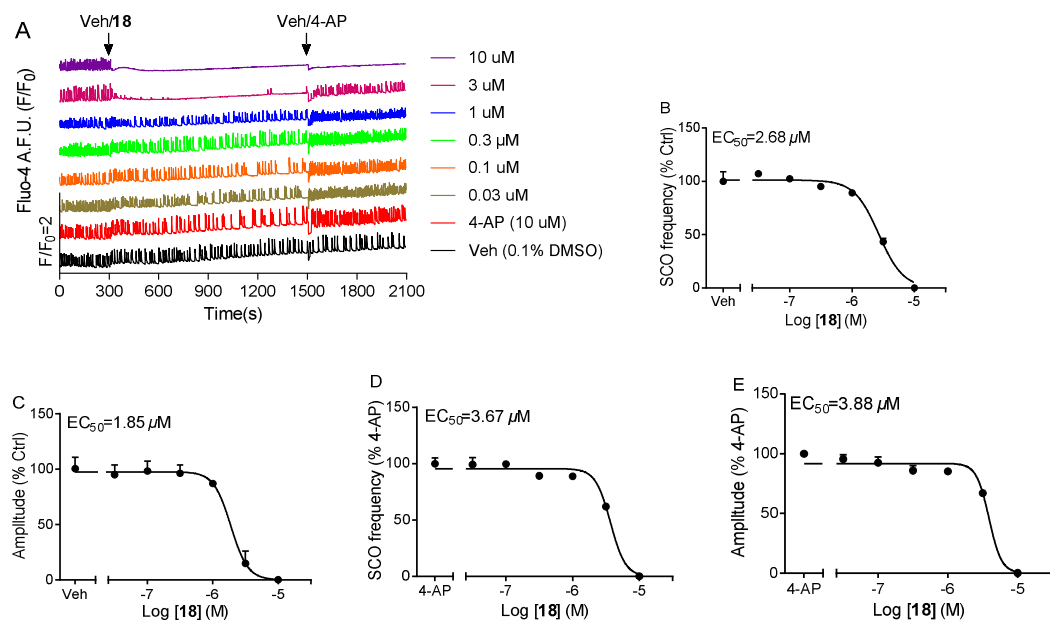

Figure S89. Effects of **18** on SCOs in primary cultured cortical neurons.

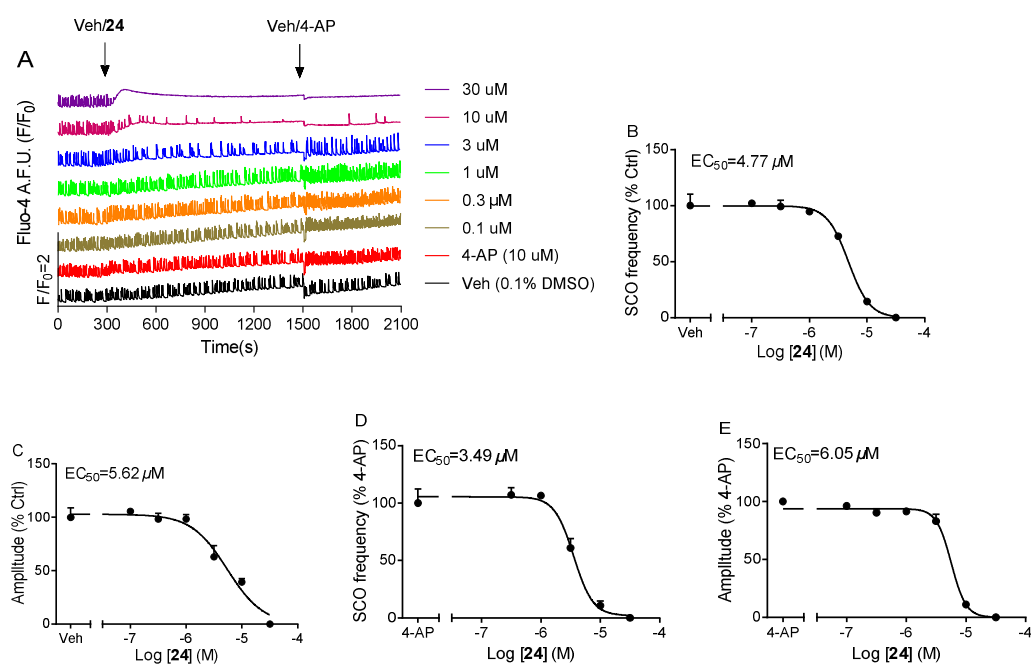

Figure S90. Effects of **24** on SCOs in primary cultured cortical neurons.

(A) Representative traces of compound suppression of SCOs before and after addition of Veh/4-AP to the cortical neurons. (B, C) Concentration-response relationships of compounds take effect on frequency and amplitude of SCOs. (D, E) Concentration-response relationships of compounds take effect on of 4-AP induced the frequency and amplitude of SCOs.
